# Supplementary material for: Access to 1,3-oxazine-2,4-diones/1,3-thiazine-2,4-diones via organocatalytic CO2/COS incorporation into allenamides
Source: Royal Society of Chemistry journal article supplement (doi:10.1039/c9ob02398d), 2019-12-30
Supplement: c9ob02398d1.pdf [file c9ob02398d1.pdf]

## Supporting Information for

# Access to 1,3-Oxazine-2,4-diones/1,3-thiazine-2,4-diones via Organocatalytic CO<sub>2</sub>/COS Incorporation into Allenamides

*Hui Zhou,\* Rui Wang, Hui Zhang, Wei Chen and Xiao-Bing Lu*

[E-mail: zhouhui@dlut.edu.cn](mailto:zhouhui@dlut.edu.cn)

### Table of Contents

|                                                                                                                                               |    |
|-----------------------------------------------------------------------------------------------------------------------------------------------|----|
| 1. General Procedure:.....                                                                                                                    | 1  |
| 2. Optimization of <b>4a</b> formation catalyzed by LB-COS adducts .....                                                                      | 1  |
| 3. Crystallography .....                                                                                                                      | 3  |
| 4. Experimental procedure for synthesis of 1, 3-oxazine-2, 4-dione ( <b>3a</b> ) and 1, 3-thiazine-2, 4-dione ( <b>4a</b> ) derivatives ..... | 4  |
| 5. Mechanistic studies .....                                                                                                                  | 7  |
| 6. NMR spectra .....                                                                                                                          | 20 |
| 7. References.....                                                                                                                            | 53 |

## 1. General Procedure:

All manipulations of oxygen- and/or moisture-sensitive materials were performed under an atmosphere of dry argon using standard Schlenk or dry box techniques. NHC-COS adducts, NHO-COS adducts and THPE-COS adducts were prepared according to the reported procedures.<sup>[S1-S3]</sup> Solvents were dried by standard methods and distilled under argon. <sup>1</sup>H, and <sup>13</sup>C NMR spectra were recorded on Varian Inova 500, Varian Inova 400 and Bruker 500 spectrometers.

## 2. Optimization of 4a formation catalyzed by LB-COS adducts

**Table S1.** Optimization of the reaction conditions<sup>a</sup>

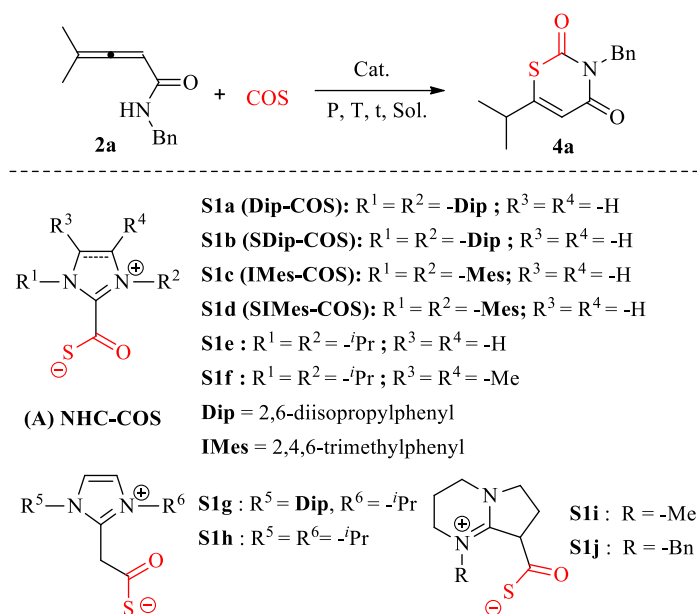

| Entry | Catalyst (5 mol %) | Solvent (0.5 mL) | P (MPa) | T (°C) | t (h) | Yield (%) <sup>a)</sup> |
|-------|--------------------|------------------|---------|--------|-------|-------------------------|
| 1     | <b>S1a</b>         | DMSO             | 1.0     | 60     | 4     | 14                      |
| 2     | <b>S1b</b>         | DMSO             | 1.0     | 60     | 4     | 9                       |
| 3     | <b>S1c</b>         | DMSO             | 1.0     | 60     | 4     | 4                       |
| 4     | <b>S1d</b>         | DMSO             | 1.0     | 60     | 4     | 1                       |
| 5     | <b>S1e</b>         | DMSO             | 1.0     | 60     | 4     | 19                      |
| 6     | <b>S1f</b>         | DMSO             | 1.0     | 60     | 4     | 5                       |
| 7     | <b>S1g</b>         | DMSO             | 1.0     | 60     | 4     | 21                      |
| 8     | <b>S1h</b>         | DMSO             | 1.0     | 60     | 4     | 5                       |

|    |            |                    |     |    |    |    |
|----|------------|--------------------|-----|----|----|----|
| 9  | <b>S1i</b> | DMSO               | 1.0 | 60 | 4  | 21 |
| 10 | <b>S1j</b> | DMSO               | 1.0 | 60 | 4  | 45 |
| 11 | <b>S1j</b> | DMSO               | 1.0 | 60 | 12 | 81 |
| 12 | <b>S1j</b> | DMSO               | 0.1 | 60 | 12 | 44 |
| 13 | <b>S1j</b> | DMSO               | 1.0 | 25 | 4  | 0  |
| 14 | <b>S1j</b> | DMF                | 1.0 | 60 | 4  | 43 |
| 15 | <b>S1j</b> | DCM                | 1.0 | 60 | 4  | 0  |
| 16 | <b>S1j</b> | CH <sub>3</sub> CN | 1.0 | 60 | 4  | 70 |
| 17 | <b>S1j</b> | CH <sub>3</sub> CN | 1.0 | 60 | 6  | 76 |
| 18 | <b>S1j</b> | CH <sub>3</sub> CN | 1.0 | 60 | 12 | 96 |
| 19 | -          | DMSO               | 1.0 | 60 | 4  | 0  |

<sup>a</sup> Reaction conditions: substrate **2a** (0.5 mmol), catalyst (5.0 mmol%). <sup>b</sup> Yields were determined by <sup>1</sup>H-NMR analysis.

We initially explored the annulation of COS with *N*-benzyl 4-methyl-2,3-pentadienamides (**2a**) as the model substrate using Lewis Base-COS adducts under 1.0 MPa COS. After considerable experimentation, we found that both NHC-COS adducts and NHO-COS adducts showed lower reactivity than THPE-COS adducts and especially **S1j** (5 mol%) as the catalyst in DMSO under 1 MPa COS at 60 °C for 4 h provided the best results, giving rise to 1,3-thiazine-2,4-dione (**4a**) in 45% yield (Table S1, entries 1-10). As expected, when a Lewis base-COS adduct was not added, no product was obtained (Table S1, entry 19). Some other typical results under different conditions are summarized in Table 1. Based on these results, we also examined the effect of pressure and found that the yield of the target product decreased significantly when the pressure of COS decreased (Table S1, entry 12). Then, the effect of temperature was investigated and found no product formation at 25 °C (Table S1, entry 13). Other solvents such as DMF, DCM, CH<sub>3</sub>CN were also tested; CH<sub>3</sub>CN were the most efficient than others (Table S1, entries 14-16). An enhancement in yield was observed when the reaction time prolonged to 12 h (Table S1, entry 18), which was defined to be our standard reaction conditions for further study.

### 3. Crystallography

Single crystals of complexes **4h** suitable for X-ray structural analysis were obtained from acetone solution at room temperature. Diffraction data were collected at 220 K on a Bruker SMART-CCD diffractometer using graphite-monochromated Mo K $\alpha$  radiation ( $\lambda = 0.71073 \text{ \AA}$ ). The structures were solved by direct methods<sup>[S4]</sup> and refined by full-matrix least squares on F<sup>2</sup>. All nonhydrogen atoms were refined anisotropically, and the hydrogen atoms were included in idealized positions. All calculations were performed using the SHELXTL<sup>[S5]</sup> crystallographic software packages. CCDC: 1859584 (**4h**) contain supplementary crystallographic data for this paper. These data can be obtained free of charge from The Cambridge Crystallographic Data Centre via [www.ccdc.cam.ac.uk/data\\_request/cif](http://www.ccdc.cam.ac.uk/data_request/cif).

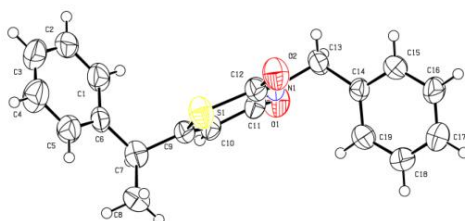

**Figure S1.** ORTEP Single Crystal X-Ray Diffraction of **4h**

**Table S2.** Crystal data and structure refinement for **4h**

|                        |                                          |                                 |                         |
|------------------------|------------------------------------------|---------------------------------|-------------------------|
| Bond precision:        | C-C = 0.0071 Å                           | Wavelength=0.71073              |                         |
| Cell:                  | a=5.5128(6)<br>alpha=90                  | b=14.1945(18)<br>beta=90        | c=20.649(3)<br>gamma=90 |
| Temperature:           | 296 K                                    |                                 |                         |
|                        | Calculated                               | Reported                        |                         |
| Volume                 | 1615.8(4)                                | 1615.8(3)                       |                         |
| Space group            | P 21 21 21                               | P2(1)2(1)2(1)                   |                         |
| Hall group             | P 2ac 2ab                                | ?                               |                         |
| Moiety formula         | C19 H17 N O2 S                           | ?                               |                         |
| Sum formula            | C19 H17 N O2 S                           | C19 H17 N O2 S                  |                         |
| Mr                     | 323.40                                   | 323.40                          |                         |
| Dx, g cm <sup>-3</sup> | 1.329                                    | 1.329                           |                         |
| Z                      | 4                                        | 4                               |                         |
| Mu (mm <sup>-1</sup> ) | 0.209                                    | 0.209                           |                         |
| F000                   | 680.0                                    | 680.0                           |                         |
| F000'                  | 680.77                                   |                                 |                         |
| h, k, lmax             | 7, 18, 26                                | 7, 18, 26                       |                         |
| Nref                   | 3723[ 2171]                              | 3680                            |                         |
| Tmin, Tmax             | 0.970, 0.979                             | 0.600, 0.746                    |                         |
| Tmin'                  | 0.967                                    |                                 |                         |
| Correction method= #   | Reported T Limits: Tmin=0.600 Tmax=0.746 |                                 |                         |
| AbsCorr =              | MULTI SCAN                               |                                 |                         |
| Data completeness=     | 1.70/0.99                                | Theta(max)= 27.520              |                         |
| R(reflections)=        | 0.0643( 1611)                            | wR2(reflections)= 0.1734( 3680) |                         |
| S =                    | 0.964                                    | Npar= 208                       |                         |

#### 4. Experimental procedure for synthesis of 1, 3-oxazine-2, 4-dione (3a) and 1, 3-thiazine-2, 4-dione (4a) derivatives

##### 3-benzyl-1-(2-hydroxyethyl)-6-isopropylpyrimidine-2, 4-dione (5)

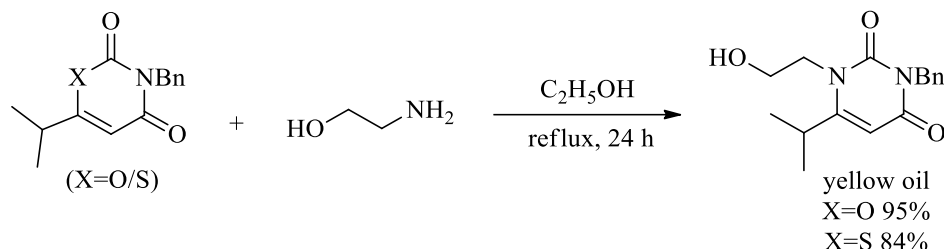

The obtained product **3a** (252 mg, 1.03 mmol) and ethanol (4.0 mL) were sequentially added to a 10 mL round bottom flask, followed by dropwise addition of ethanolamine (160 mg, 2.62 mmol) to the reaction mixture. The mixture was refluxed for 24 h. The solvents were evaporated under vacuum and the residue was purified by column chromatography (silica gel, dichloromethane/methanol = 20:1) to afford the desired product ( $R_f = 0.40$ ) as yellow liquid (0.28 g, 95%). **<sup>1</sup>H NMR** (400 MHz, CDCl<sub>3</sub>)  $\delta$  7.44 (d,  $J = 6.7$  Hz, 2H), 7.27 (dt,  $J = 12.1, 6.9$  Hz, 3H), 5.66 (s, 1H), 5.07 (s, 2H), 4.03 (t,  $J = 5.3$  Hz, 2H), 3.82 (dd,  $J = 10.1, 5.0$  Hz, 2H), 3.28 – 2.85 (m, 2H), 1.19 (d,  $J = 6.8$  Hz, 6H). **<sup>13</sup>C NMR** (101 MHz, CDCl<sub>3</sub>)  $\delta$  162.9, 162.2, 152.9, 136.8, 129.1, 128.4, 127.6, 97.8, 60.9, 46.2, 44.5, 29.3, 21.8. **HRMS(ESI)**: calcd for C<sub>16</sub>H<sub>20</sub>N<sub>2</sub>O<sub>3</sub>: 289.1547 [M+H]<sup>+</sup>. Found: 289.1546 [M+H]<sup>+</sup>. **IR**: 3433, 2972, 2879, 1698, 1651, 1609, 1496, 1448, 1400, 1348, 1218, 1062, 827, 769, 727, 708, 613, 525 cm<sup>-1</sup> (vs).

##### 1-amino-3-benzyl-6-isopropylthiazine-2, 4-dione (6)

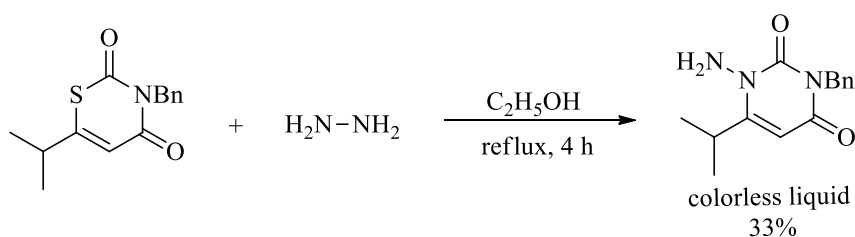

The obtained product **4a** (166 mg, 0.64 mmol) and ethanol (2.0 mL) were sequentially added to a 10 mL round bottom flask, followed by dropwise addition of hydrazine (200 mg, 6.24 mmol) to the reaction mixture. The mixture was refluxed for 4 h. The solvents were evaporated under vacuum and the residue was purified by

column chromatography (silica gel, dichloromethane/methanol = 40:1) to afford the desired product ( $R_f = 0.80$ ) as colorless liquid (54 mg, 33%).  **$^1\text{H}$  NMR** (400 MHz,  $\text{CDCl}_3$ )  $\delta$  7.48 (d,  $J = 6.9$  Hz, 2H), 7.36 – 7.22 (m, 3H), 5.60 (s, 1H), 5.11 (s, 2H), 4.35 (s, 2H), 3.46 – 3.26 (m, 1H), 1.20 (d,  $J = 6.8$  Hz, 6H).  **$^{13}\text{C}$  NMR** (126 MHz,  $\text{CDCl}_3$ )  $\delta$  163.2, 162.4, 153.5, 136.9, 129.3, 128.5, 127.8, 96.6, 44.9, 29.0, 21.2. **HRMS(ESI)**: calcd for  $\text{C}_{14}\text{H}_{17}\text{N}_3\text{O}_2$ : 260.1394  $[\text{M}+\text{H}]^+$ . Found: 260.1392  $[\text{M}+\text{H}]^+$ . **IR**: 3326, 3217, 1703, 1662, 1495, 1440, 1399, 1346, 1237, 1196, 1180, 1132, 1076, 1041, 823, 756, 711, 698, 611, 522  $\text{cm}^{-1}$  (vs).

***N*-benzyl-3-(benzylamino)-*N*-(benzylcarbamoyl)-4-methylpent-2-enamide (7a) and 1,3-dibenzyl-6-isopropylpyrimidine-2,4-dione (7b)**

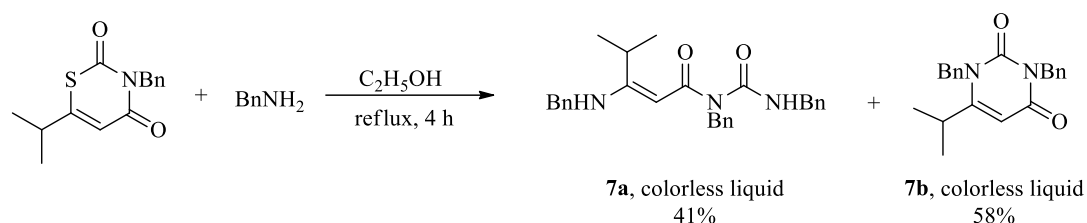

The obtained product **4a** (170 mg, 0.65 mmol) and ethanol (4.0 mL) were sequentially added to a 10 mL round bottom flask, followed by dropwise addition of benzylamine (280 mg, 2.60 mmol) to the reaction mixture. The mixture was refluxed for 22 h at 100 °C. The solvents were evaporated under vacuum and the residue was purified by column chromatography (silica gel, PE/EtOAc = 5:1) to afford the desired product **7a** ( $R_f = 0.60$ , 121 mg, 41%) and **7b** ( $R_f = 0.40$ , 391 mg, 58%) as colorless liquid. **7a.  $^1\text{H}$  NMR** (400 MHz,  $\text{CDCl}_3$ )  $\delta$  10.05 (s, 2H), 7.45 – 7.09 (m, 15H), 5.06 (s, 2H), 4.73 (s, 1H), 4.55 (d,  $J = 5.6$  Hz, 2H), 4.38 (d,  $J = 6.3$  Hz, 2H), 2.65 – 2.47 (m, 1H), 0.87 (d,  $J = 6.8$  Hz, 6H).  **$^{13}\text{C}$  NMR** (101 MHz,  $\text{CDCl}_3$ )  $\delta$  173.6, 173.3, 157.0, 139.3, 139.1, 138.2, 128.8, 128.5, 128.5, 127.5, 127.5, 127.0, 126.7, 126.7, 126.3, 80.8, 47.8, 46.0, 44.5, 29.0, 21.4. **HRMS(ESI)**: calcd for  $\text{C}_{28}\text{H}_{31}\text{N}_3\text{O}_2$ : 442.2489  $[\text{M}+\text{H}]^+$ . Found: 442.2500  $[\text{M}+\text{H}]^+$ . **IR**: 3236, 3063, 3030, 2970, 2932, 2872, 1684, 1605, 1581, 1514, 1453, 1371, 1298, 1275, 1235, 1206, 1181, 1148, 1079, 1056, 1030, 934, 781, 733, 699  $\text{cm}^{-1}$  (vs). **7b.  $^1\text{H}$  NMR** (400 MHz,  $\text{CDCl}_3$ )  $\delta$  7.53 (d,  $J = 7.3$  Hz, 2H), 7.43 – 7.23 (m, 6H), 7.12 (d,  $J = 7.4$  Hz, 2H), 5.77 (s, 1H), 5.20 (s, 4H), 2.93 – 2.60 (m, 1H), 1.16 (d,  $J = 6.8$  Hz, 6H).  **$^{13}\text{C}$  NMR** (101 MHz,  $\text{CDCl}_3$ )  $\delta$  162.6, 161.7,

152.7, 137.0, 136.5, 129.0, 129.0, 128.4, 127.6, 127.5, 125.7, 98.3, 47.0, 44.6, 29.5, 22.0. **HRMS(ESI)**: calcd for C<sub>21</sub>H<sub>22</sub>N<sub>2</sub>O<sub>2</sub>: 335.1754 [M+H]<sup>+</sup>. Found: 335.1756 [M+H]<sup>+</sup>. **IR**: 3088, 3063, 3032, 2972, 2877, 1703, 1656, 1614, 1496, 1442, 1395, 1351, 1218, 1182, 1074, 1026, 932, 826, 763, 730, 698, 606, 529 cm<sup>-1</sup> (vs).

#### 6-isopropyl-1,3-thiazine-2,4-dione (8)

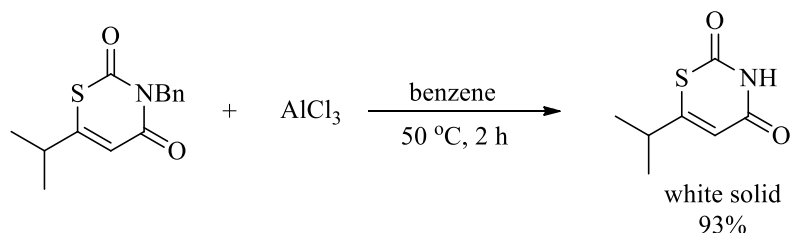

In a glove box, a 25 mL Schlenk flask, equipped with a magnetic stir bar, is charged successively with **4a** (224 mg, 0.86 mmol) and benzene (5.0 mL), followed by addition of aluminum chloride (1.1 g, 8.25 mmol) to the reaction mixture with continuous stirring. The reaction mixture was heated to 50 °C for 2 hours. Water was added and the reaction mixture was extracted with DCM (3 × 20 mL). The collected organic layers were dried over anhydrous Na<sub>2</sub>SO<sub>4</sub> and the solvents were evaporated under vacuum. Flash chromatography of the crude (silica gel, PE/EtOAc = 5:1) gave the pure product (R<sub>f</sub> = 0.25) as a white solid (136 mg, 92%). **<sup>1</sup>H NMR** (400 MHz, CDCl<sub>3</sub>) δ 9.83 (s, 1H), 6.38 (s, 1H), 3.20 – 2.43 (hept, 1H), 1.28 (d, *J* = 6.9 Hz, 6H). **<sup>13</sup>C NMR** (101 MHz, CDCl<sub>3</sub>) δ 165.3, 164.8, 163.8, 113.3, 113.0, 35.7, 21.8. **HRMS(ESI)**: calcd for C<sub>7</sub>H<sub>9</sub>N<sub>2</sub>O<sub>2</sub>S: 172.0427 [M+H]<sup>+</sup>. Found: 172.0427 [M+H]<sup>+</sup>. **IR**: 3150, 3051, 2971, 2934, 2852, 1766, 1691, 1595, 1463, 1442, 1367, 1290, 1260, 1225, 1129, 993, 967, 862, 749, 695, 643, 606, 574, 545, 485 cm<sup>-1</sup> (vs).

#### 6-isopropyl-1,3-oxazine-2,4-dione (9)

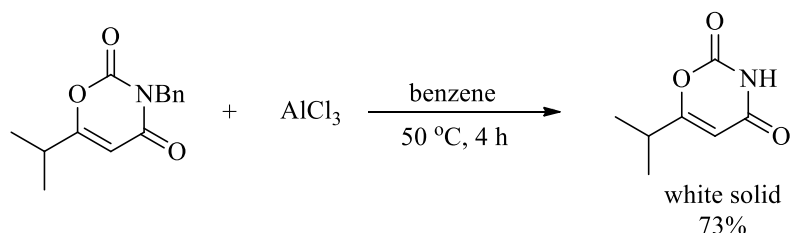

In a glove box, a 25 mL Schlenk flask, equipped with a magnetic stir bar, is charged successively with **3a** (224 mg, 0.86 mmol) and benzene (5.0 mL), followed

by addition of aluminum chloride (1.1 g, 8.25 mmol) to the reaction mixture with continuous stirring. The reaction mixture was heated to 50 °C for 4 hours. Water was added and the reaction mixture was extracted with DCM (3 × 20 mL). The collected organic layers were dried over anhydrous Na<sub>2</sub>SO<sub>4</sub> and the solvents were evaporated under vacuum. Flash chromatography of the crude (silica gel, PE/EtOAc = 5:1) gave the pure product (*R*<sub>f</sub> = 0.25) as a white solid (116 mg, 73%). <sup>1</sup>H NMR (400 MHz, CDCl<sub>3</sub>) δ 8.93 (s, 1H), 5.74 (s, 1H), 2.85 – 2.52 (m, 1H), 1.25 (d, *J* = 6.9 Hz, 6H). <sup>13</sup>C NMR (126 MHz, CDCl<sub>3</sub>) δ 175.02, 162.25, 147.77, 98.31, 32.25, 19.30. HRMS(ESI): calcd for C<sub>7</sub>H<sub>10</sub>NO<sub>3</sub>: 154.0504 [M-H]<sup>-</sup>. Found: 154.0508 [M-H]<sup>-</sup>. IR ν<sub>C=O</sub>: 1727, 1650 cm<sup>-1</sup> (vs).

## 5. Mechanistic studies

### 5.1 Control Experiments

In order to clarify the detailed reaction mechanism, several control experiments were carried out (Scheme S1). Firstly, a stoichiometric reaction involving one equivalent of LB-CO<sub>2</sub> adduct **1k** and one equivalent of allenamide **2a** was carried out in the absence of CO<sub>2</sub> (Scheme S1, I). No desired product **3a** was generated, and allenamide **2a** was totally decomposed to unknown chemicals from the crude <sup>1</sup>H-NMR. Under ambient conditions (25 °C, and 0.1 MPa CO<sub>2</sub>), the use of <sup>13</sup>C labelled **1k** and equivalent **2a** resulted in the formation of **3a** with 49% <sup>13</sup>C label determined by HRMS spectra (Scheme S1, II; Figure S3). When increasing the reaction temperature to 60 °C and CO<sub>2</sub> pressure to 2.0 MPa, **3a** with 40% <sup>13</sup>C label could also be detected (Scheme S1, II; Figure S4). For COS system, a stoichiometric reaction could carry out in the absence of COS, and the desired thiazine-2, 4-dione **4b** was obtained in 14% yield (Scheme S1, III). When introducing free COS (1.0 MPa) into isotope labeling experiment, **4b** with only 18% <sup>13</sup>C label was obtained (Scheme S1, IV; Figure S6), which preferentially comes from free COS rather than COS moiety in THPE-COS adducts. When introducing free CO<sub>2</sub> (1.0 MPa) into stoichiometric reaction involving one equivalent of LB-COS adduct **S1j** and one equivalent of allenamide **2b**, **4b** was obtained in 2% yield and **3b** was obtained in 90% yield (Scheme S1, V).



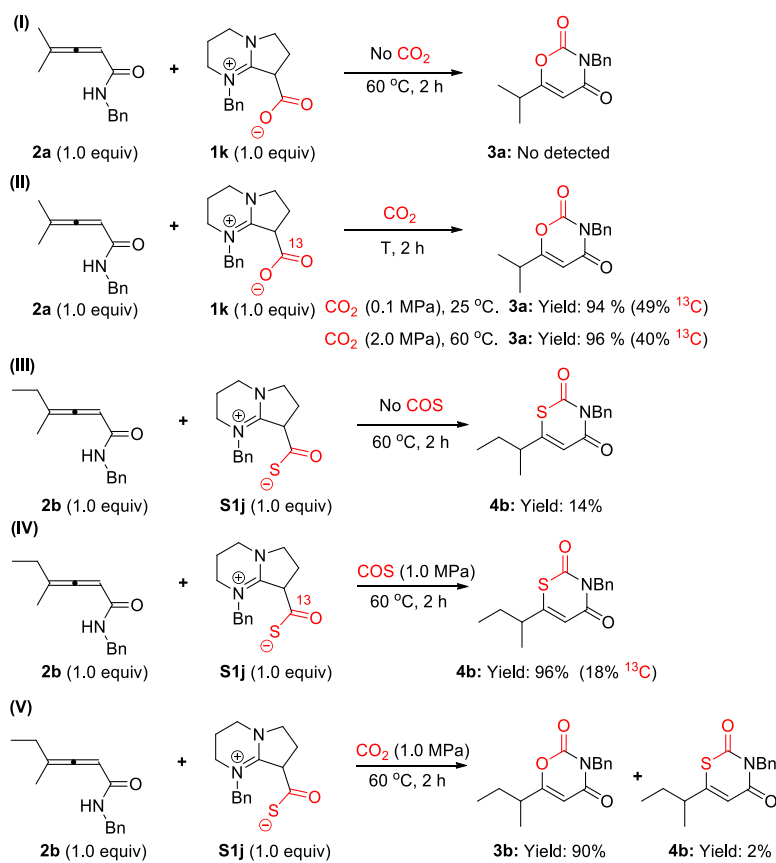

**Scheme S1.** Preliminary mechanistic studies

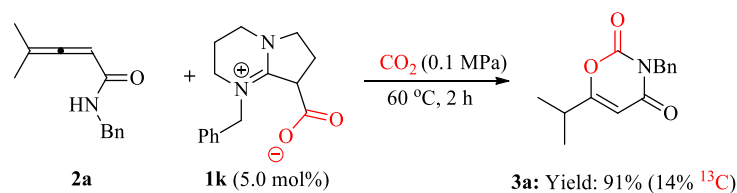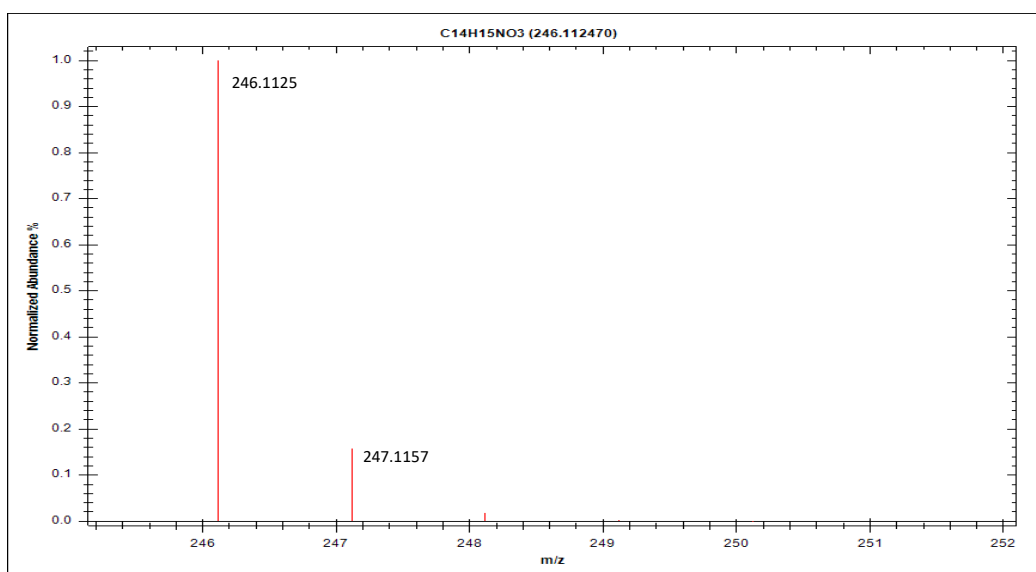

**Figure S2.** Enlarged HRMS Spectra of Product **3a**

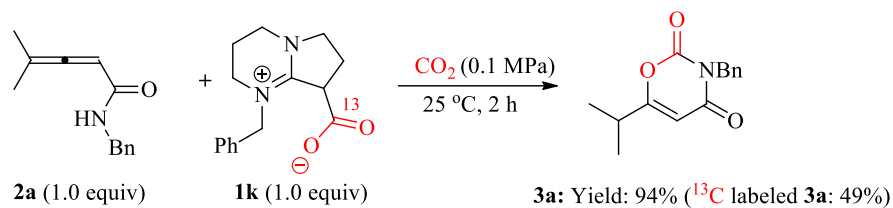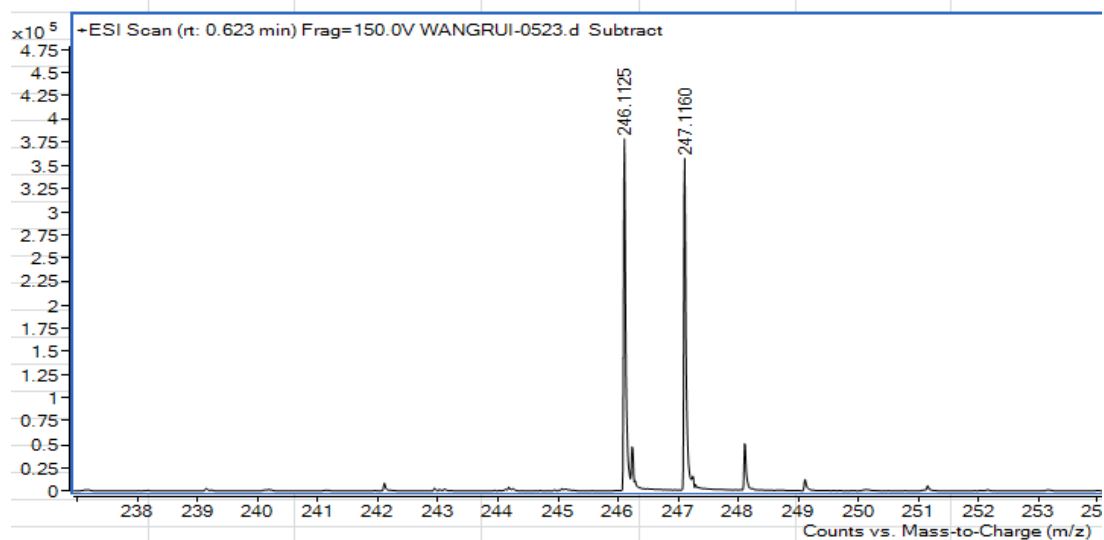

**Figure S3.** Enlarged HRMS Spectra of Scheme 3 (II)

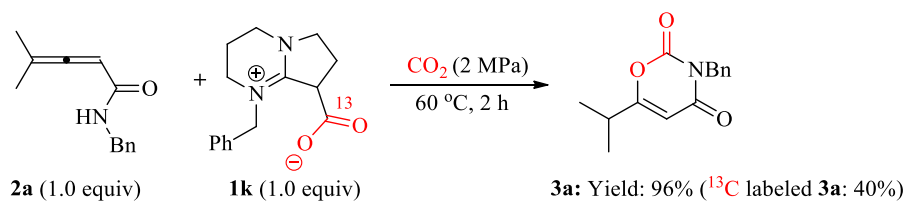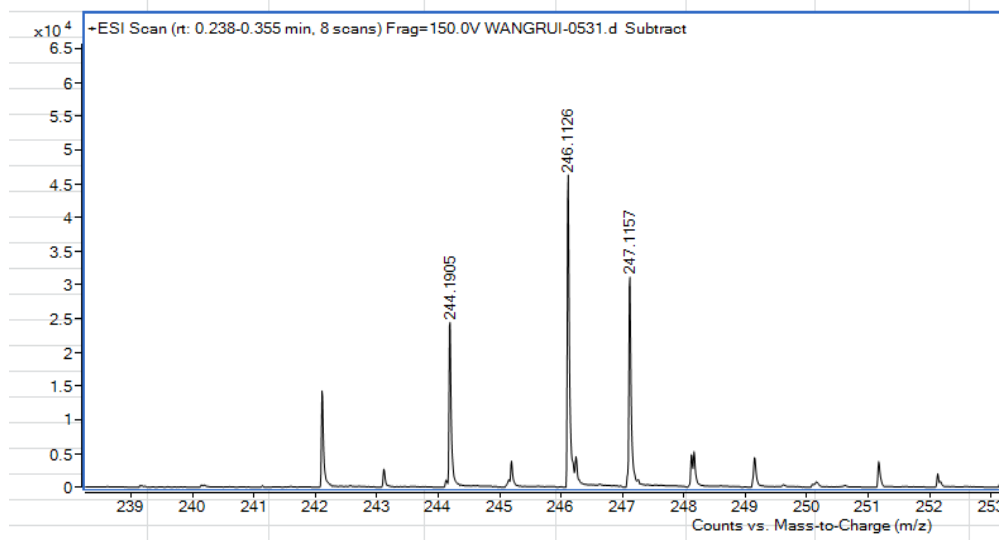

**Figure S4.** Enlarged HRMS Spectra of Scheme 3 (II)

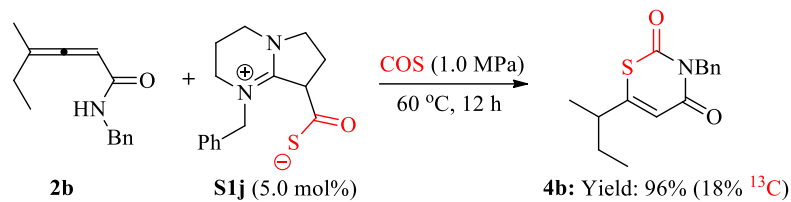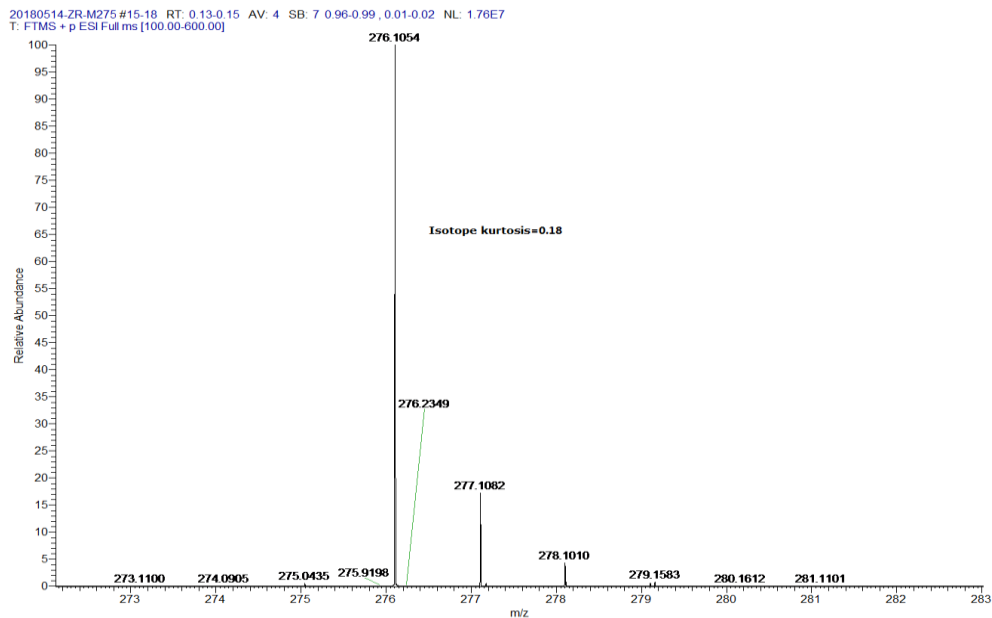

**Figure S5. Enlarged HRMS Spectra of Product 4b**

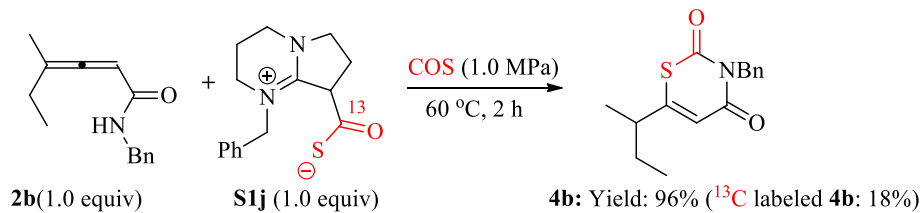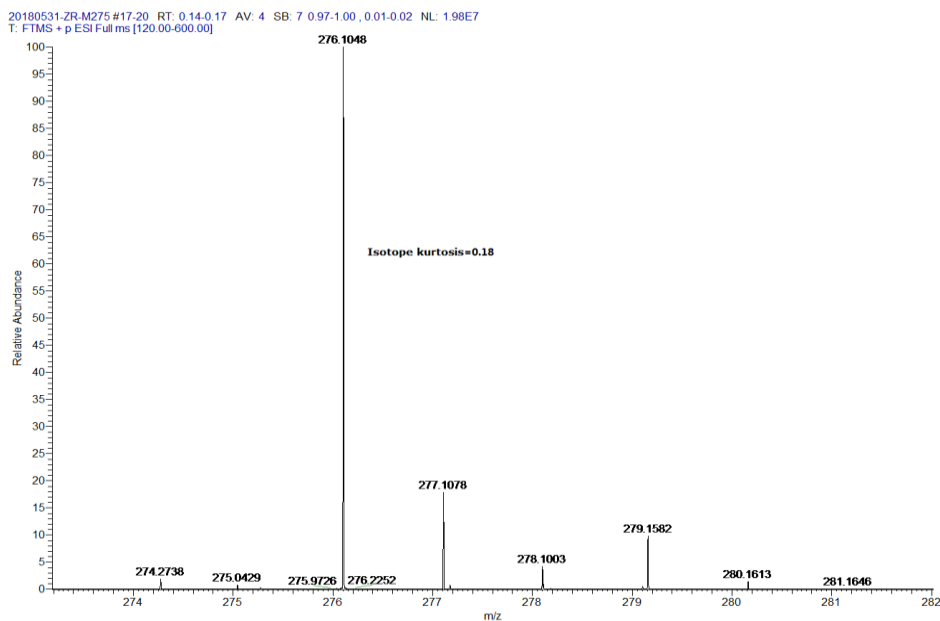

**Figure S6. Enlarged HRMS Spectra of Scheme 3 (IV)**

## 5.2 Exchange Experiments

In order to further understand the reaction mechanism, we further systematically investigated the exchange reaction of THPE- $^{13}\text{COX}$  adducts with free COX by means of HRMS. First, in the glove box, a 10 mL Schlenk flask equipped with a magnetic stir bar was charged with THPE- $^{13}\text{CO}_2$  adduct (0.5 mmol) and DMSO (0.5 mL), successively. The flask was then evacuated and filled with  $\text{CO}_2$  with a balloon and the reaction was stirred at 25 °C for 2 hours. We found that there was an exchange phenomenon between THPE- $^{13}\text{CO}_2$  adduct and free  $\text{CO}_2$  in the absence of the substrate (Figure S8). This exchange process also occurs when the reaction temperature rises to 60 °C (Figure S9). In addition, we also found that the exchange process proceeded very quickly, and a large amount of THPE- $\text{CO}_2$  was detected within five minutes of reaction (Figure S10). Furthermore, the exchange process between THPE- $\text{CO}_2$  and free  $^{13}\text{CO}_2$  can also proceed smoothly under reaction conditions, which indicates that exchange behavior is reversible (Figure S12). Moreover, we investigated the exchange process between THPE- $^{13}\text{COS}$  and free COS in the absence of the substrate in the same way. Unlike the exchange of THPE- $\text{CO}_2$  adduct and free  $\text{CO}_2$ , THPE- $^{13}\text{COS}$  is very stable in the presence  $\text{COS}$  atmosphere at room temperature (Figure S14). However, most of THPE- $^{13}\text{COS}$  were transformed to THPE- $\text{COS}$  under high temperature (Figure S15) and high pressure (Figure S16).

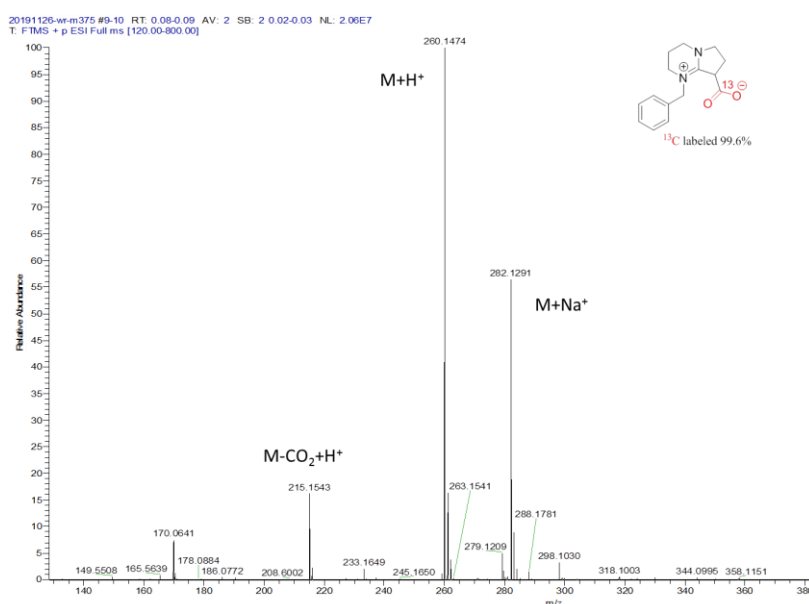

**Figure S7.** Enlarged HRMS Spectra of THPE- $^{13}\text{CO}_2$

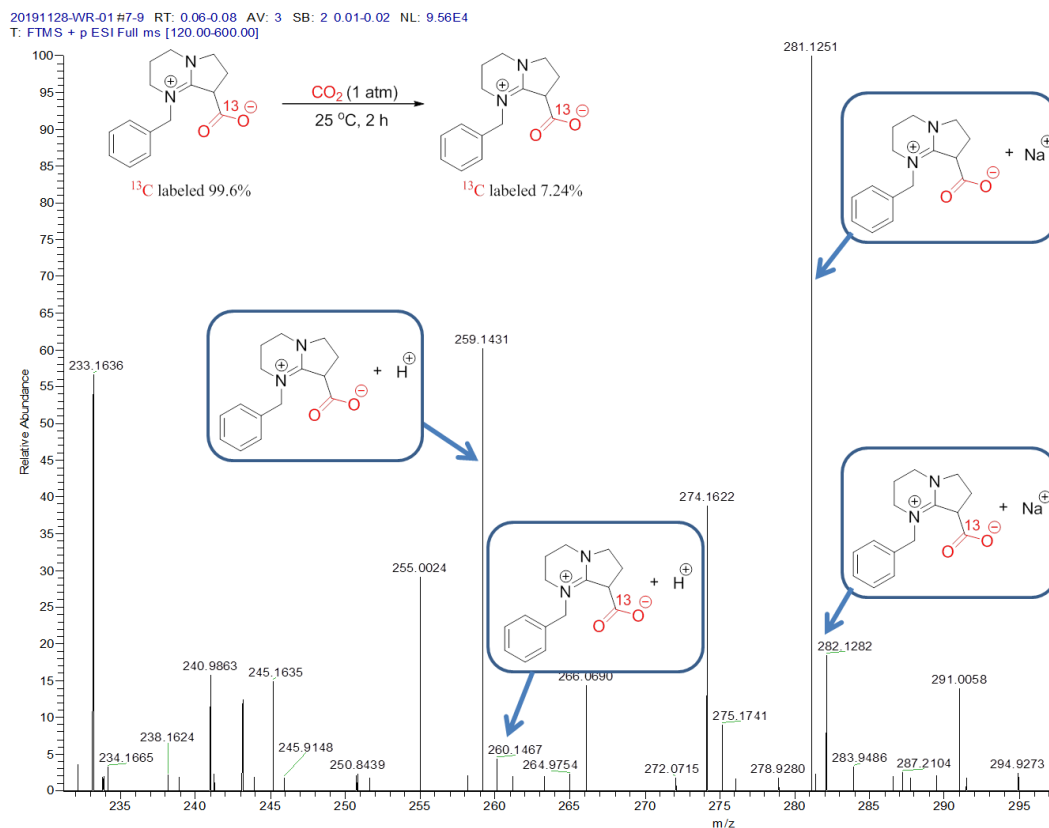

**Figure S8.** HRMS Spectra of the exchange process between THPE-<sup>13</sup>CO<sub>2</sub> and free CO<sub>2</sub> at 25 °C for 2 hours

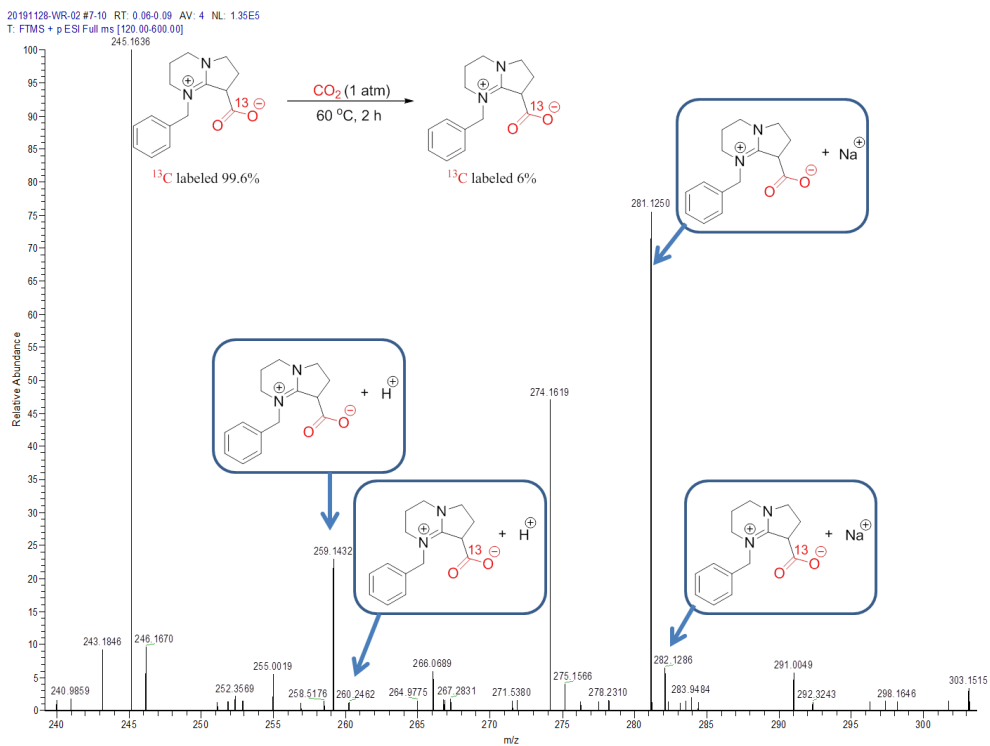

**Figure S9.** HRMS Spectra of the exchange process between THPE-<sup>13</sup>CO<sub>2</sub> and free CO<sub>2</sub> at 60 °C for 2 hours

20191204-wr-01 #6-7 RT: 0.04-0.05 AV: 2 NL: 2.51E5  
T: FTMS + p ESI Full ms [120.00-600.00]

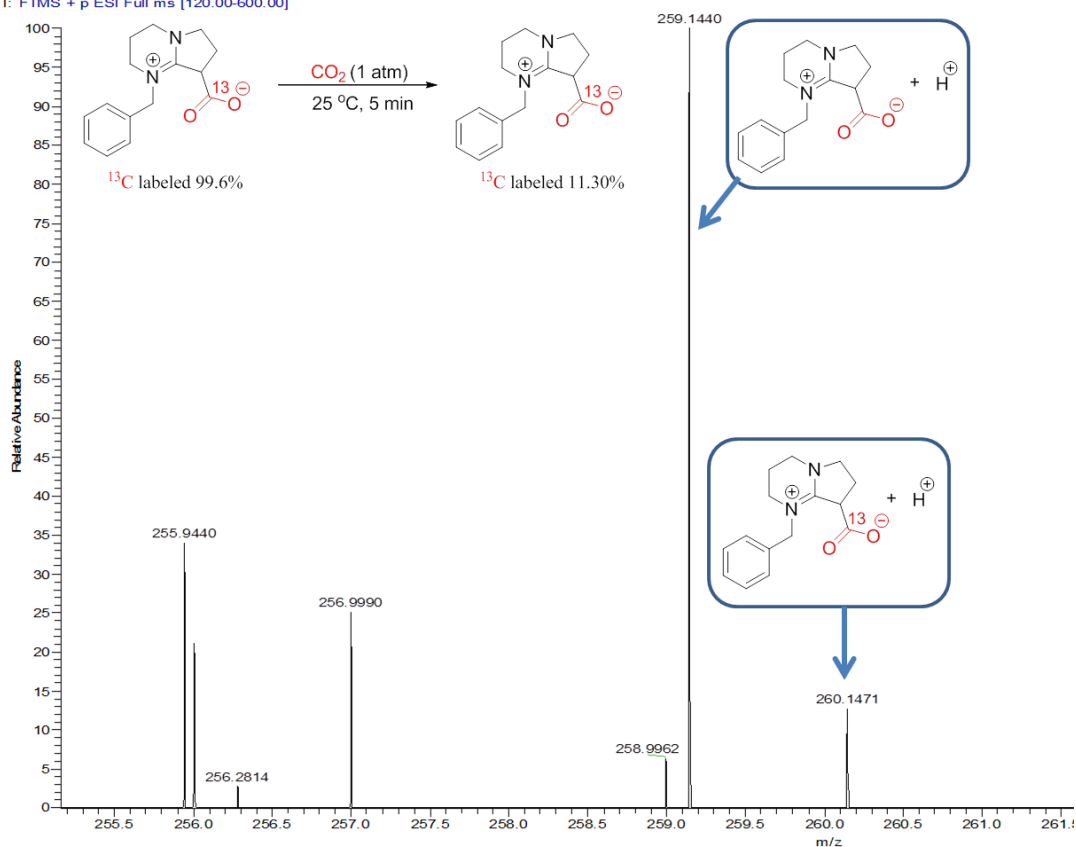

**Figure S10.** HRMS Spectra of the exchange process between THPE-<sup>13</sup>CO<sub>2</sub> and free CO<sub>2</sub> at 25 °C for 5 min

20191202-wr-01 #7-9 RT: 0.06-0.08 AV: 3 SB: 1 0.02 NL: 4.75E6  
T: FTMS + p ESI Full ms [120.00-600.00]

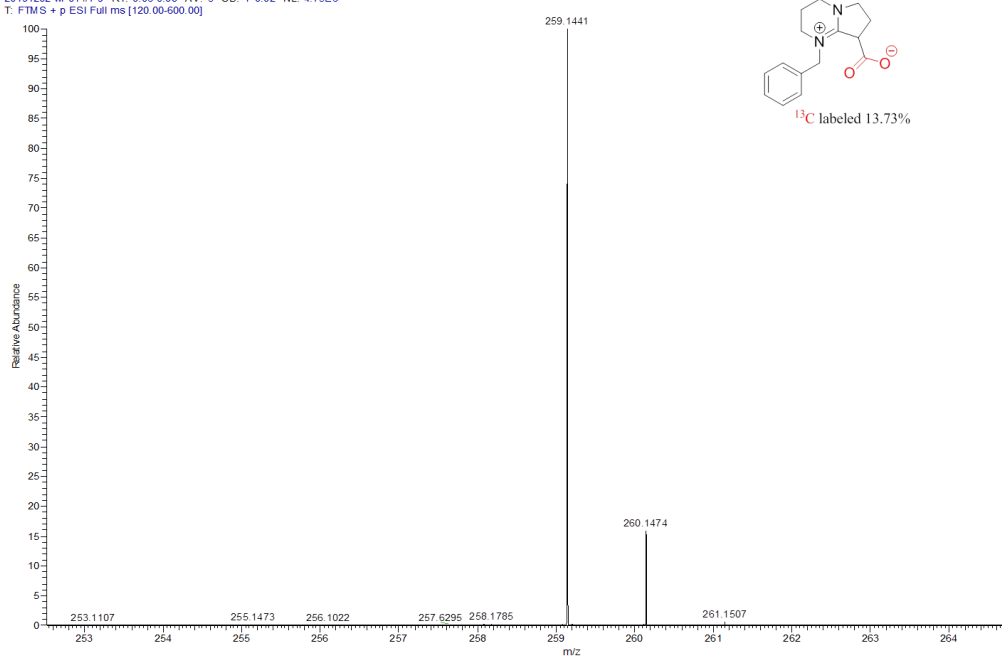

**Figure S11.** Enlarged HRMS Spectra of THPE-CO<sub>2</sub>

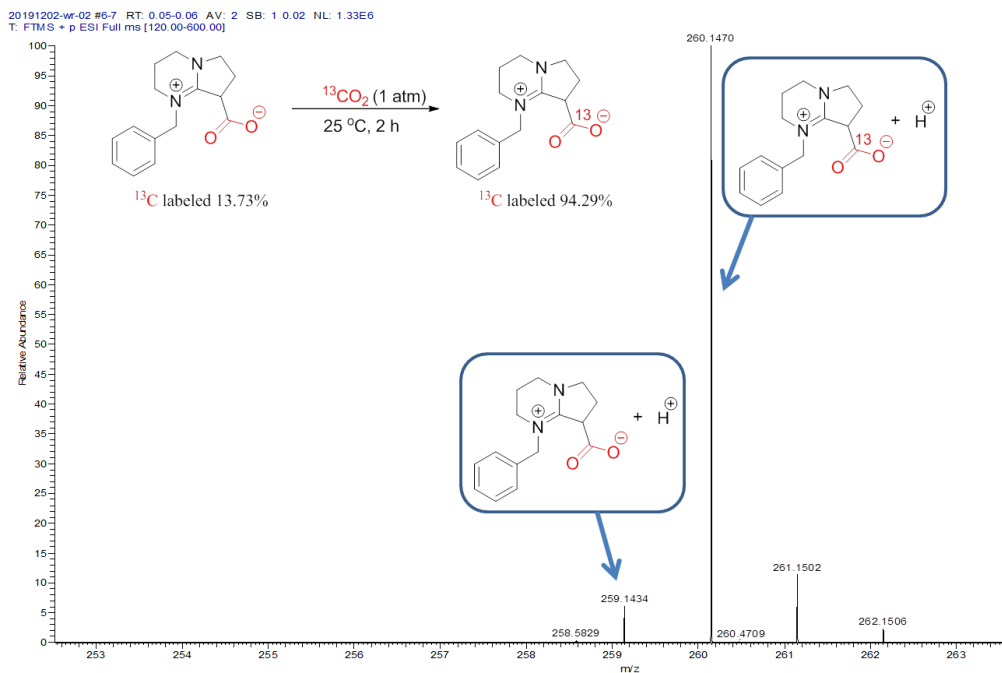

**Figure S12.** HRMS Spectra of the exchange process between THPE- $\text{CO}_2$  and free  $^{13}\text{CO}_2$  at 25 °C for 2 hours

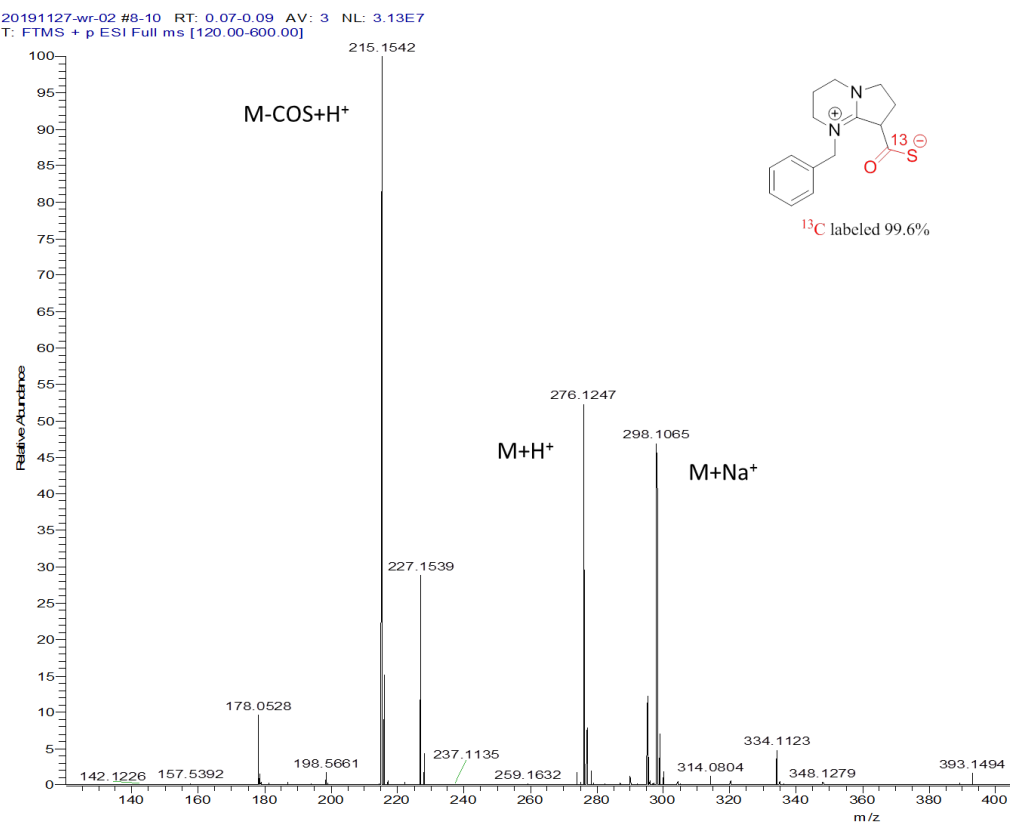

**Figure S13.** Enlarged HRMS Spectra of THPE- $^{13}\text{COS}$

20191127-wr-02 #8-10 RT: 0.07-0.09 AV: 3 NL: 3.13E7  
T: FTMS + p ESI Full ms [120.00-600.00]

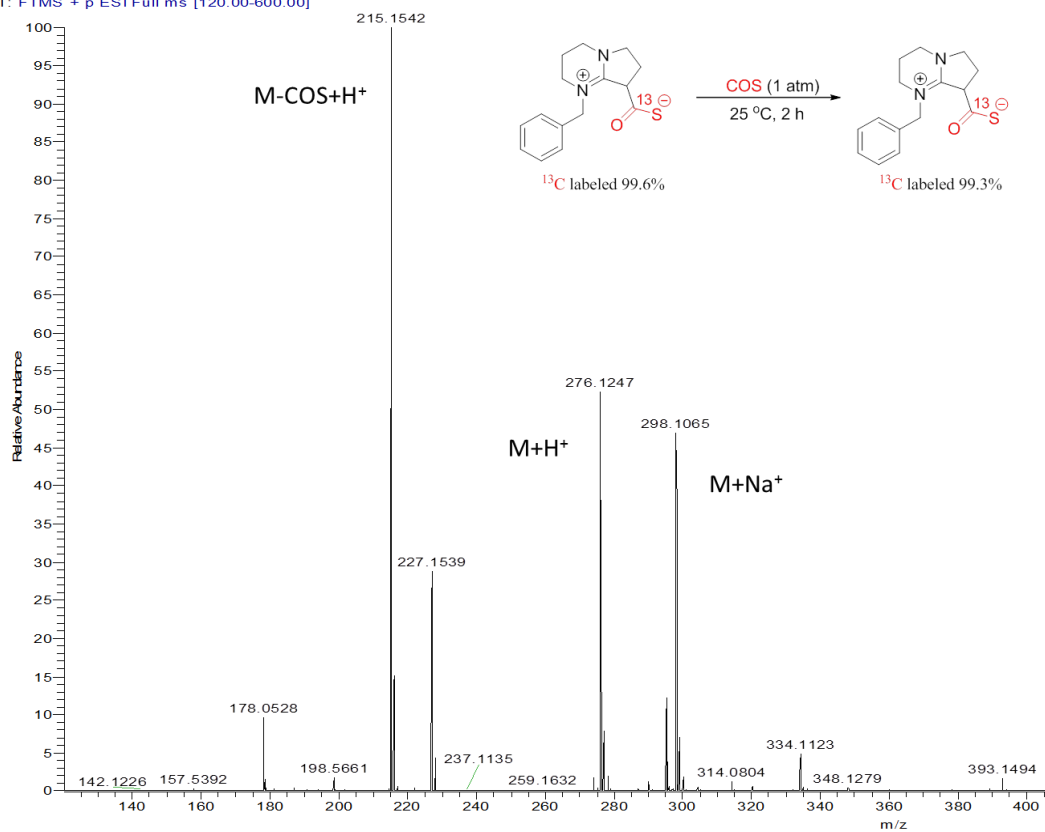

**Figure S14.** HRMS Spectra of the exchange process between THPE-<sup>13</sup>COS and free COS at 25 °C for 2 hours

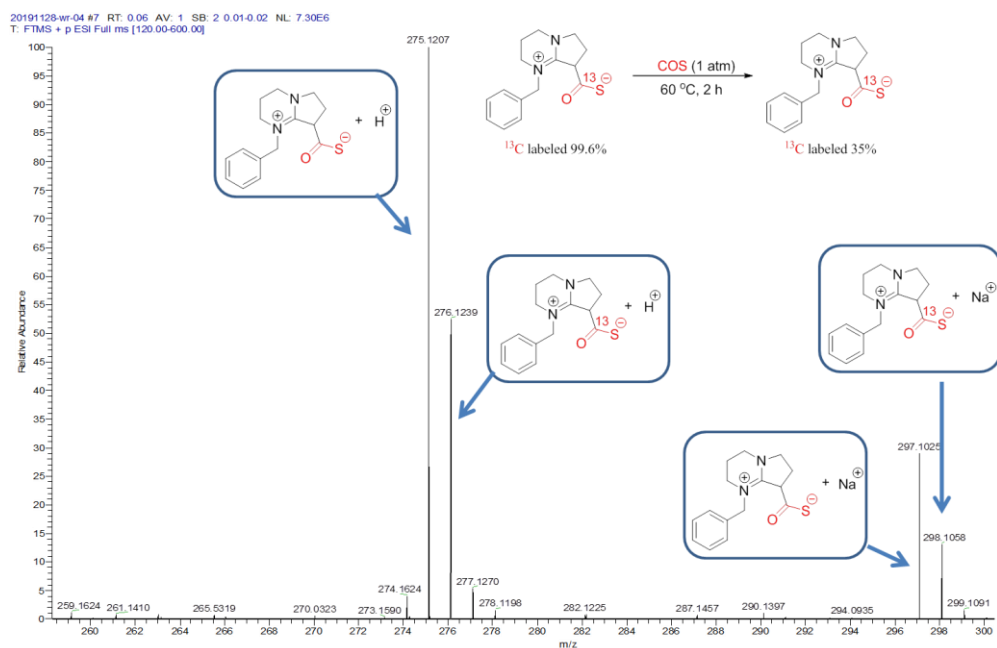

**Figure S15.** HRMS Spectra of the exchange process between THPE-<sup>13</sup>COS and free COS at 60 °C for 2 hours



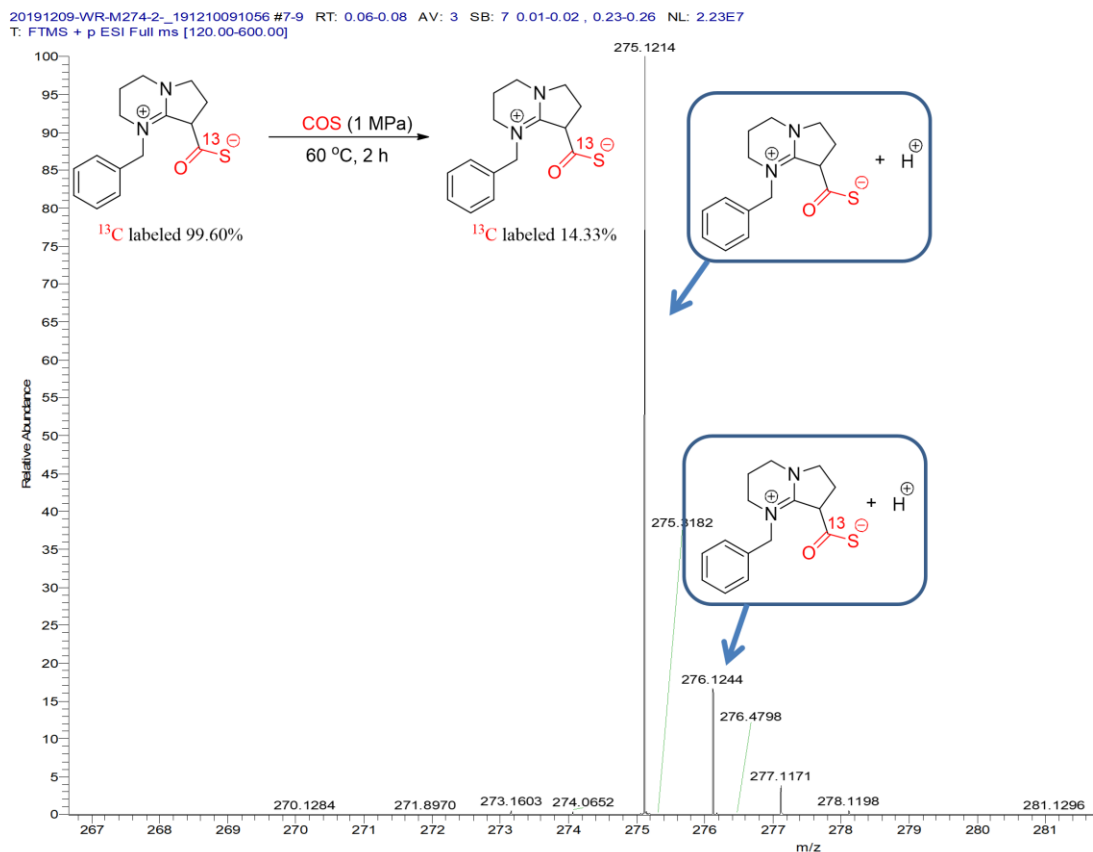

**Figure S16.** HRMS Spectra of the exchange process between THPE-<sup>13</sup>COS and free COS (1 MPa) at 60 °C for 2 hours

### 5.3 Monitoring the interaction between **2a** and LB-COX (X=O/S) adduct by <sup>1</sup>H-NMR experiments

#### Monitoring the interaction between **2a** and THPE-CO<sub>2</sub> adduct **1k**

In a glove box, a 1.0 mL vial containing a stirring bar was charged with allenamide **2a** (0.05 mmol), various concentrations of THPE-CO<sub>2</sub> adduct **1k** and DMSO-d<sub>6</sub> (0.5 mL). After 1 h with continuous stirring, the reaction mixture was detected by <sup>1</sup>H-NMR. From the data, the -NH- signal (δ 8.28 ppm) of **2a** gradually drift undergoes a modest upshift of 0.45 ppm upon addition of 1.0 equiv. of **1k** to this solution (Figure S17). <sup>1</sup>H-NMR experiments show that THPE-CO<sub>2</sub> adduct **1k** as base could activate allenamide.

#### Monitoring the interaction between **2a** and THPE-COS adduct **S1j**

In a glove box, a 1.0 mL vial containing a stirring bar was charged with allenamide **2a** (0.05 mmol), various concentrations of THPE-COS adduct **S1j** and CD<sub>3</sub>CN (0.5 mL). After 1 h with continuous stirring, the reaction mixture was detected by <sup>1</sup>H-NMR. From the data, the -NH- signal (δ 6.92 ppm) of **2a** completely

disappears, while the  $-H$  of  $-CHCO$  signal ( $\delta$  5.41 ppm) gradually drift undergoes a modest upshift of 0.11 ppm upon addition of 1.0 equiv. of THPE-COS adduct **S1j** to this solution (Figure S18).  $^1H$ -NMR experiments show that THPE-COS adduct **S1j** as base could activate allenamide.

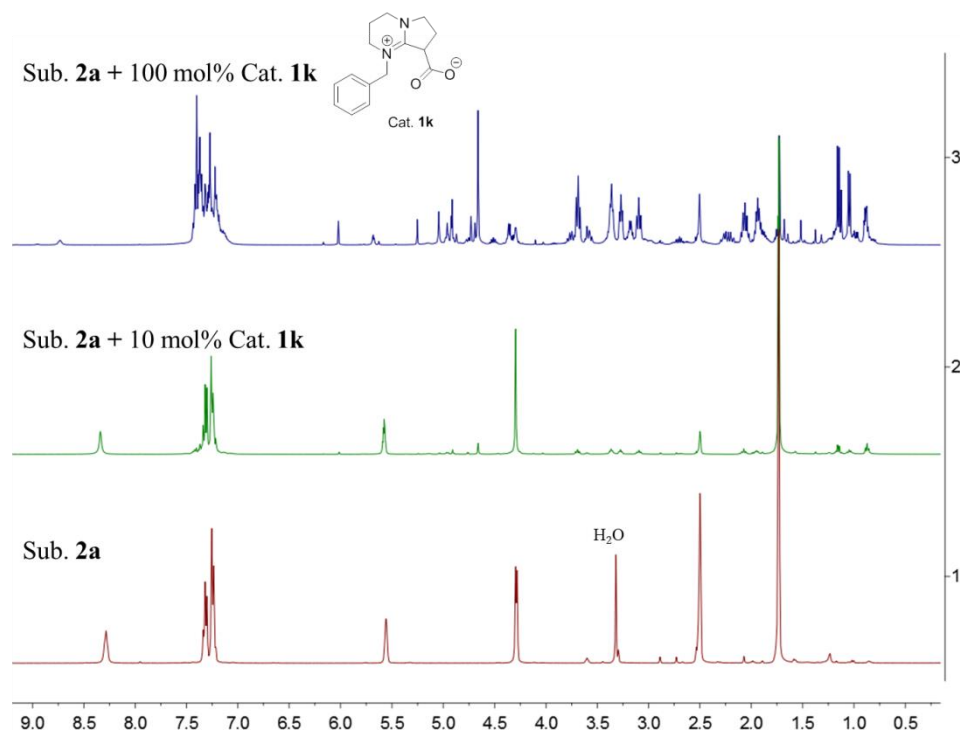

**Figure S17.** Monitoring the interaction between **2a** and THPE- $CO_2$  adduct **1k**

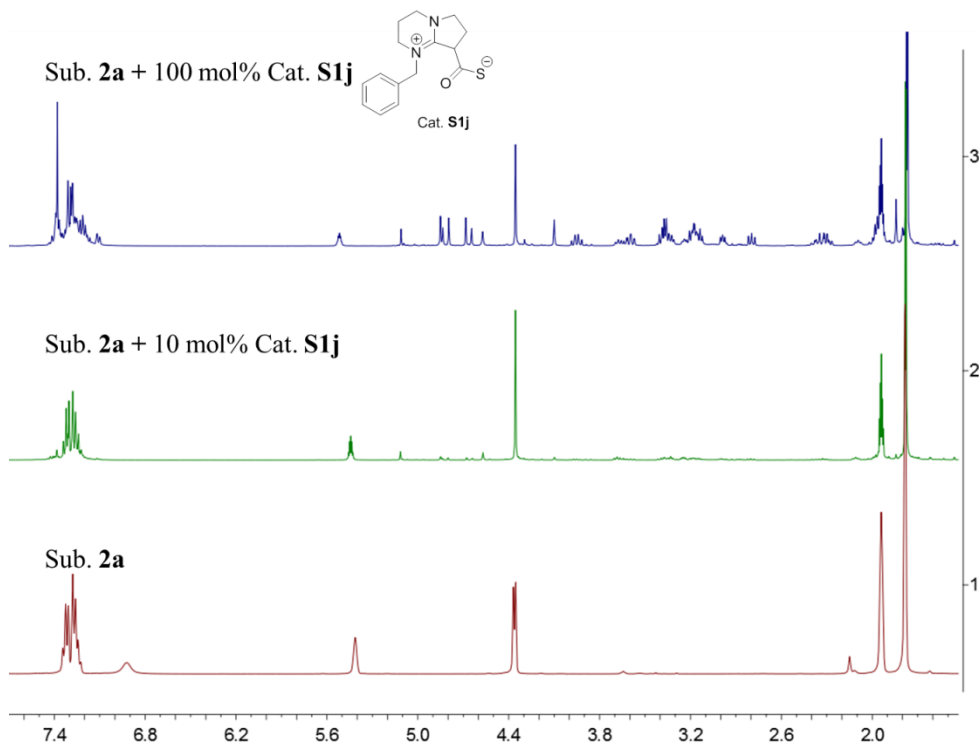

**Figure S18.** Monitoring the interaction between **2a** and THPE-COS adduct **S1j**

#### 5.4 The stability of THPE-COS adduct **S1j** under CO<sub>2</sub> atmosphere

In a glove box, a 10 mL Schlenk flask containing a stirring bar was charged with THPE-COS adduct **S1j** and CD<sub>3</sub>CN (0.5 mL). The flask was then evacuated and filled with CO<sub>2</sub> with a balloon and the reaction was stirred at 60 °C for 2 hours. The reaction mixture was detected by <sup>1</sup>H-NMR. THPE-COS adduct **S1j** was found to be very stable under CO<sub>2</sub> atmosphere by <sup>1</sup>H-NMR analysis (Figure S19).

#### 5.5 The stability of THPE-COS adduct **S1j** at 60 °C

<sup>1</sup>H-NMR (Figure S20) and <sup>13</sup>C -NMR (Figure S21) of THPE-COS adduct **S1j** were detected at 60 °C. THPE-COS adduct **S1j** was found to be stable at 60 °C by NMR analysis (Figure S20).

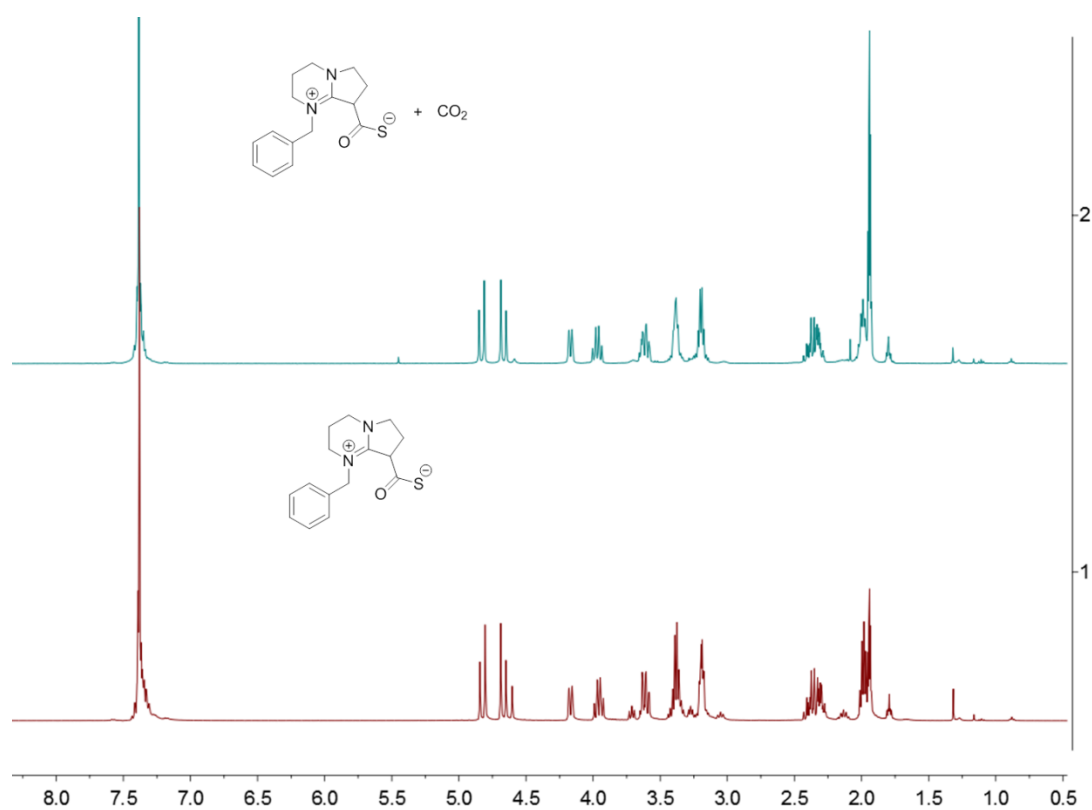

**Figure S19.** THPE-COS adduct **S1j** in the presence of CO<sub>2</sub> atmosphere

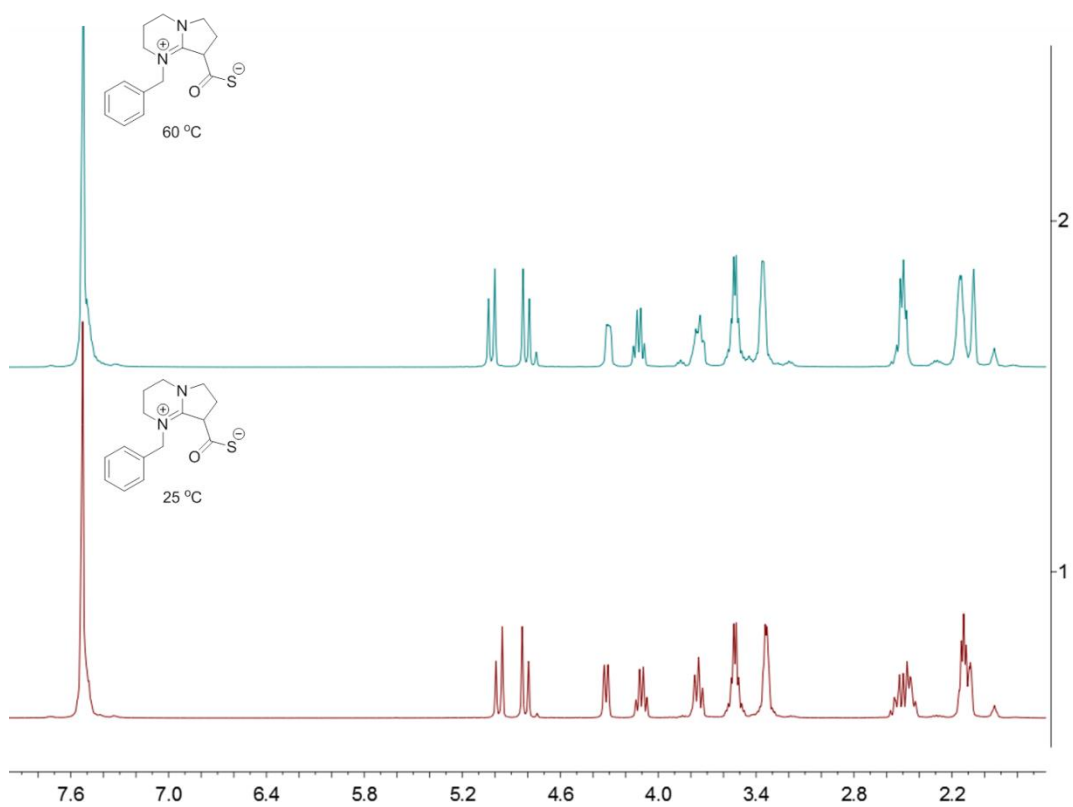

**Figure S20.** THPE-COS adduct **S1j** at 60 °C

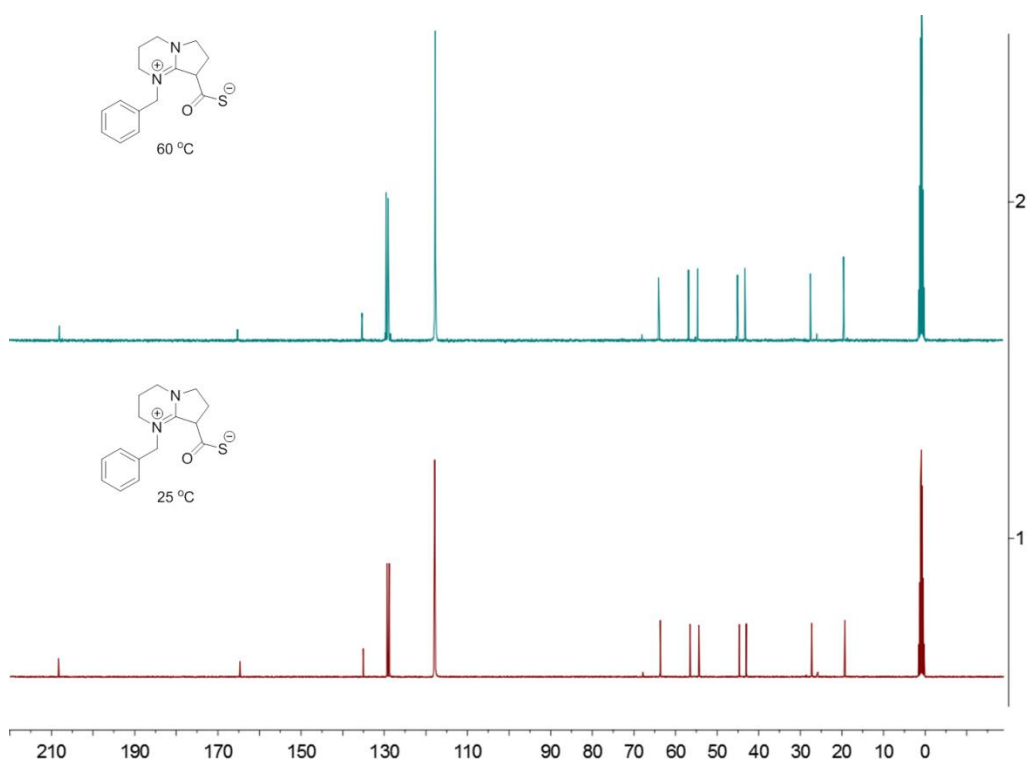

**Figure S21.** THPE-COS adduct **S1j** at 60 °C

## 6. NMR spectra

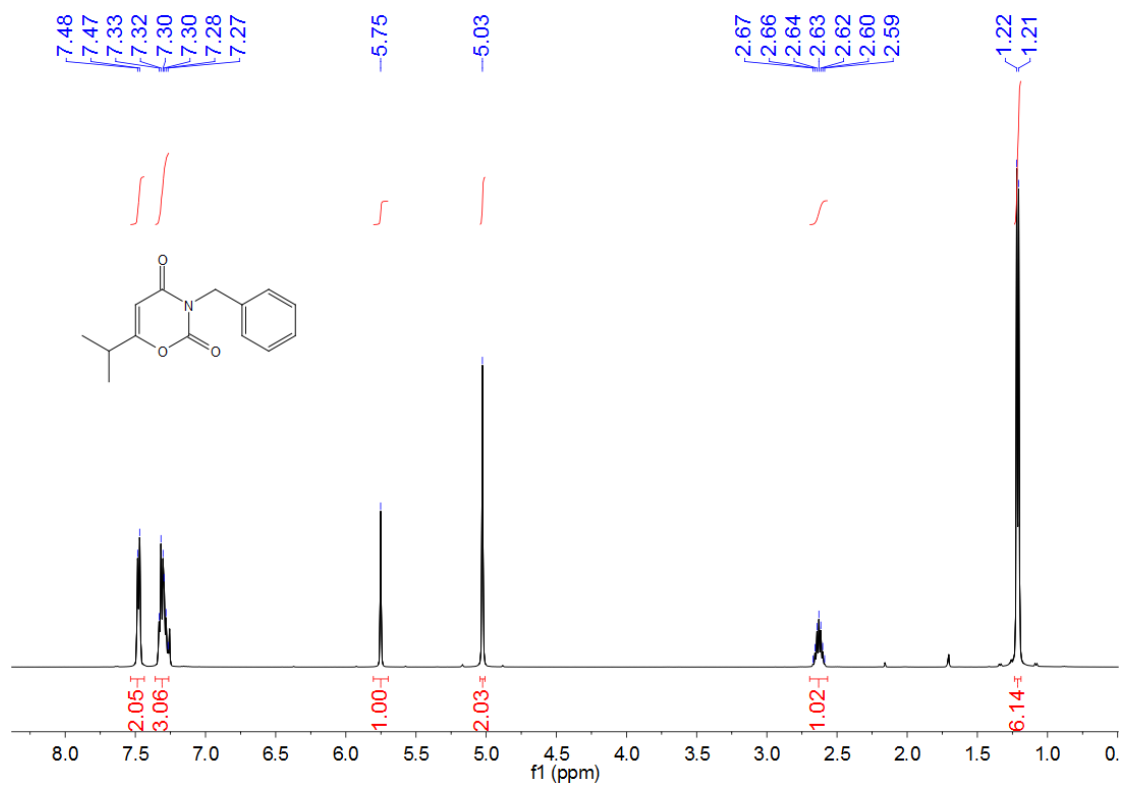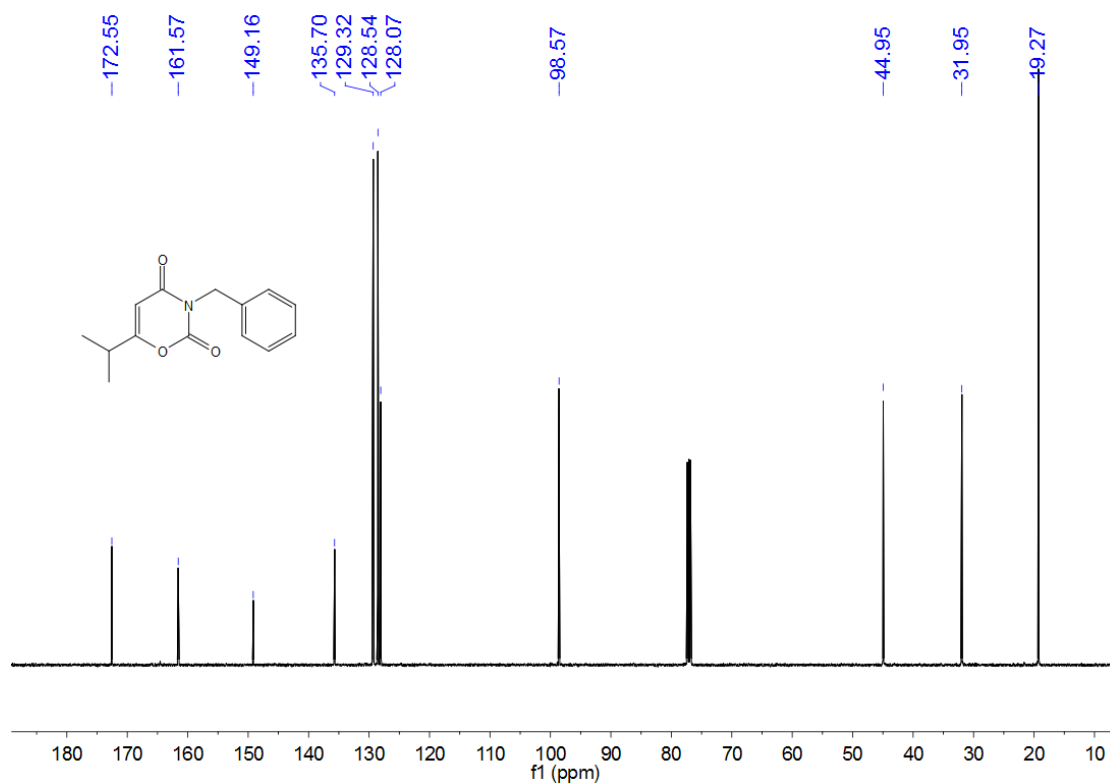

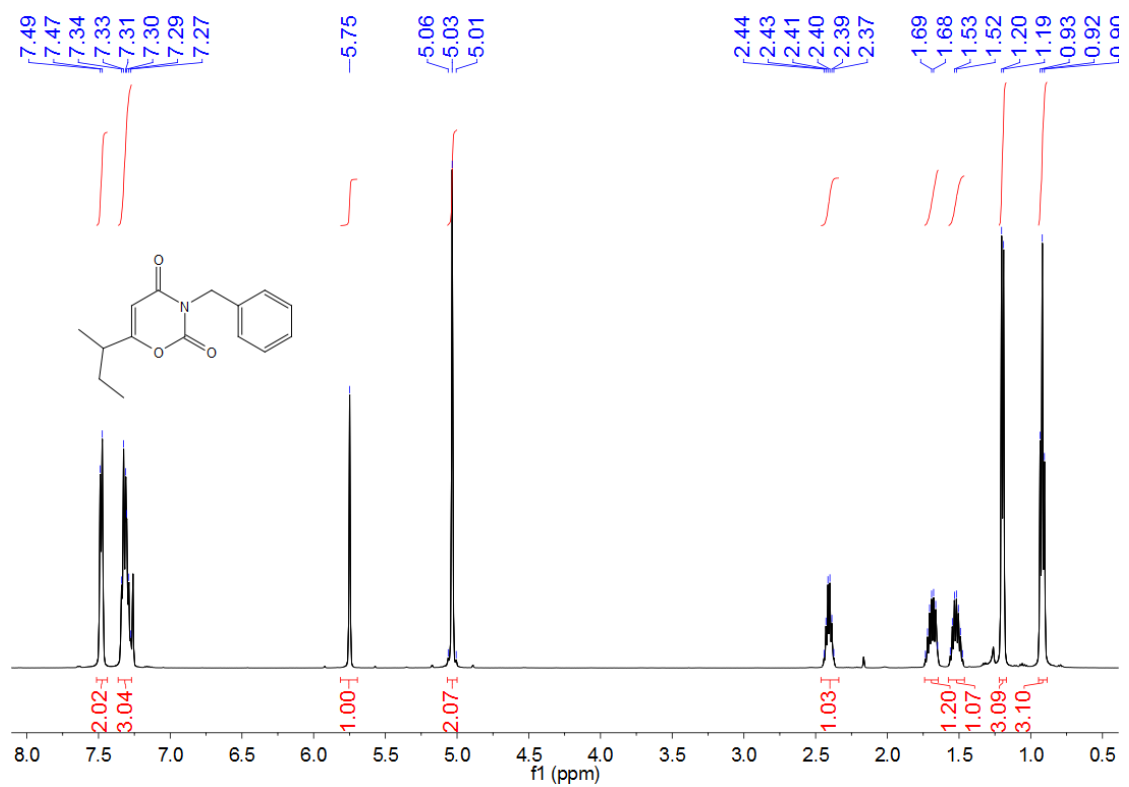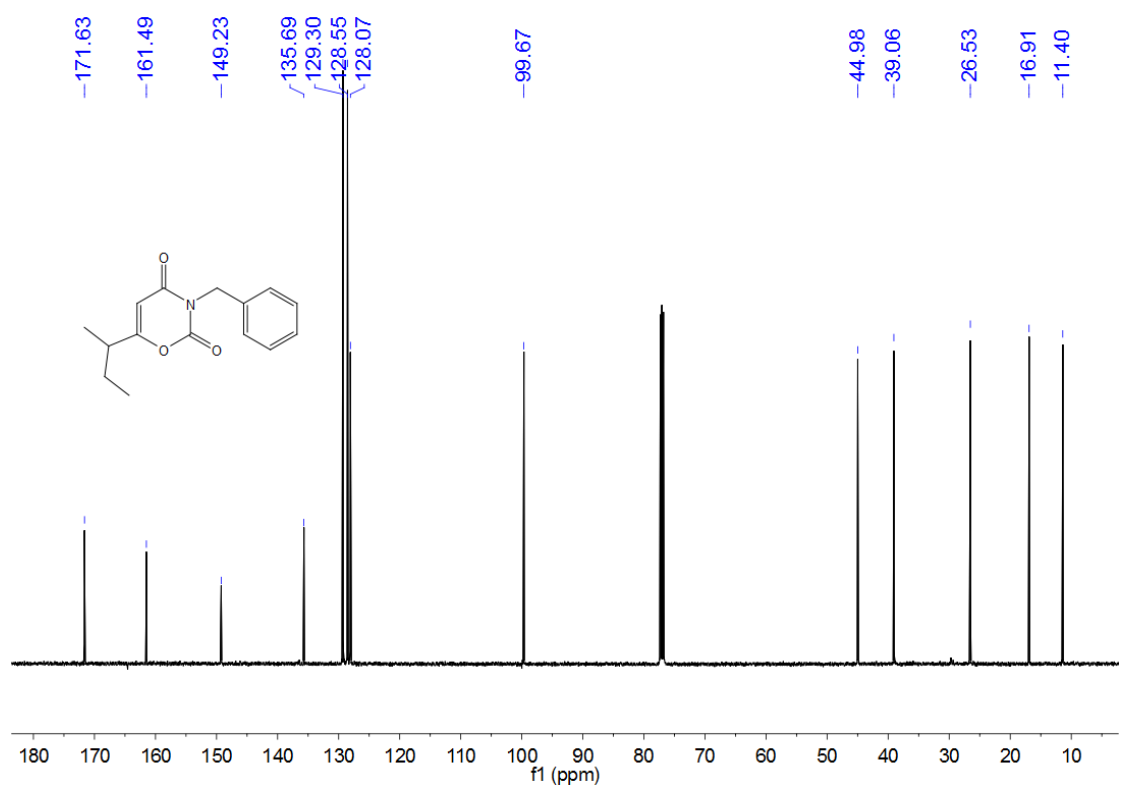

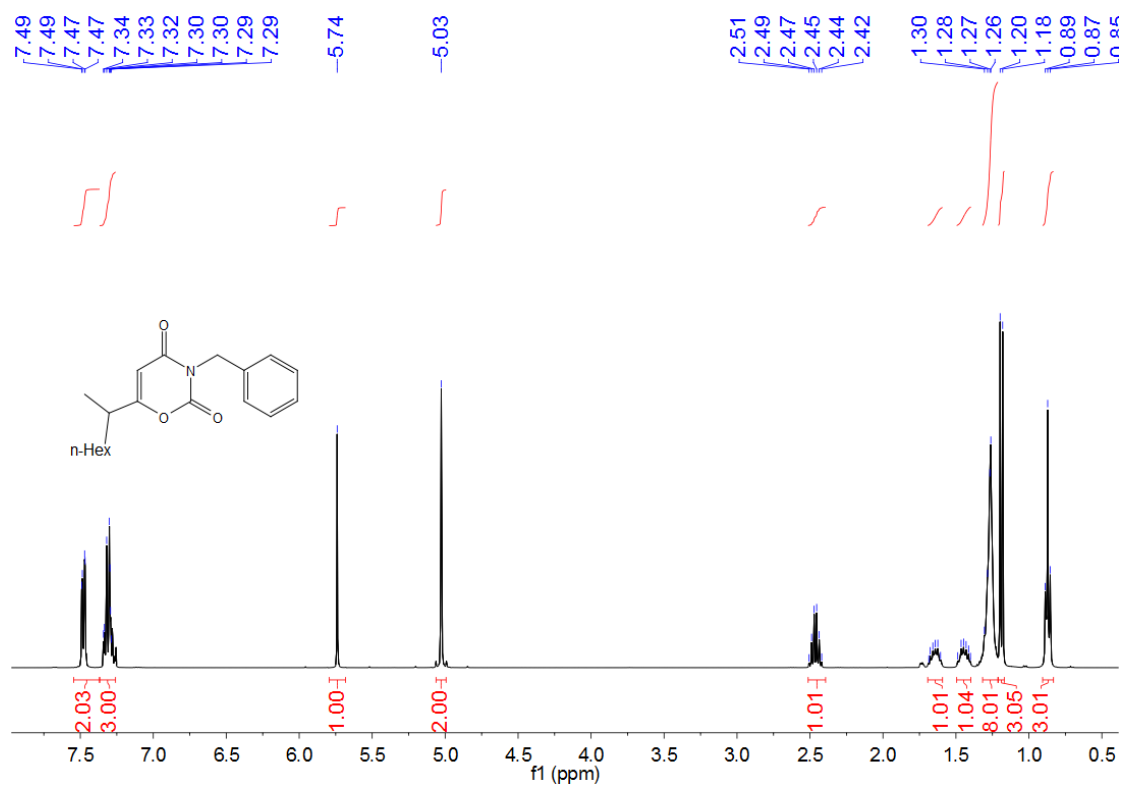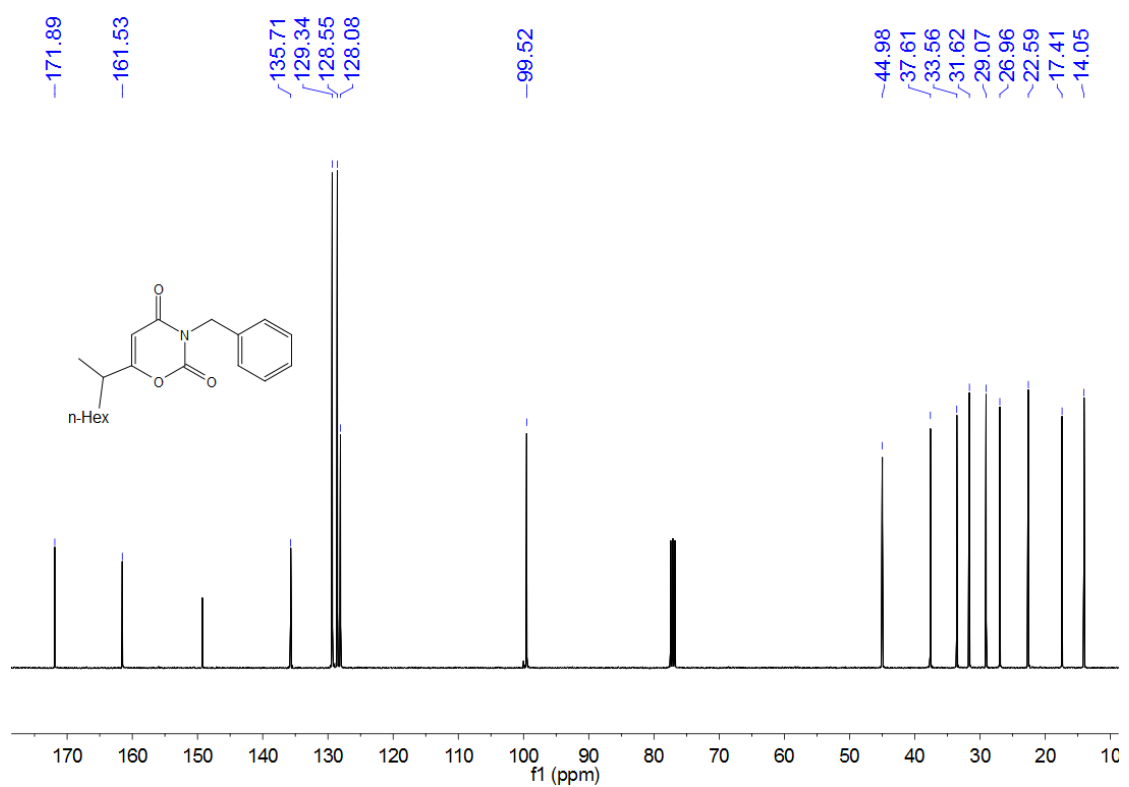

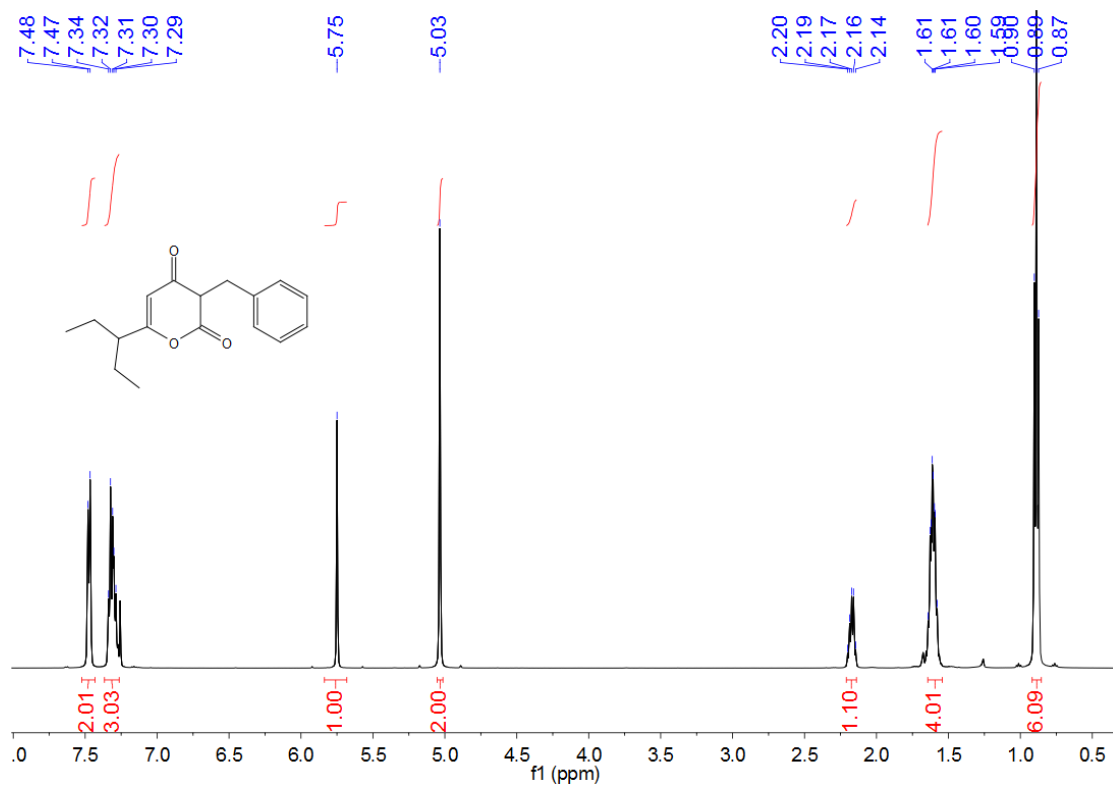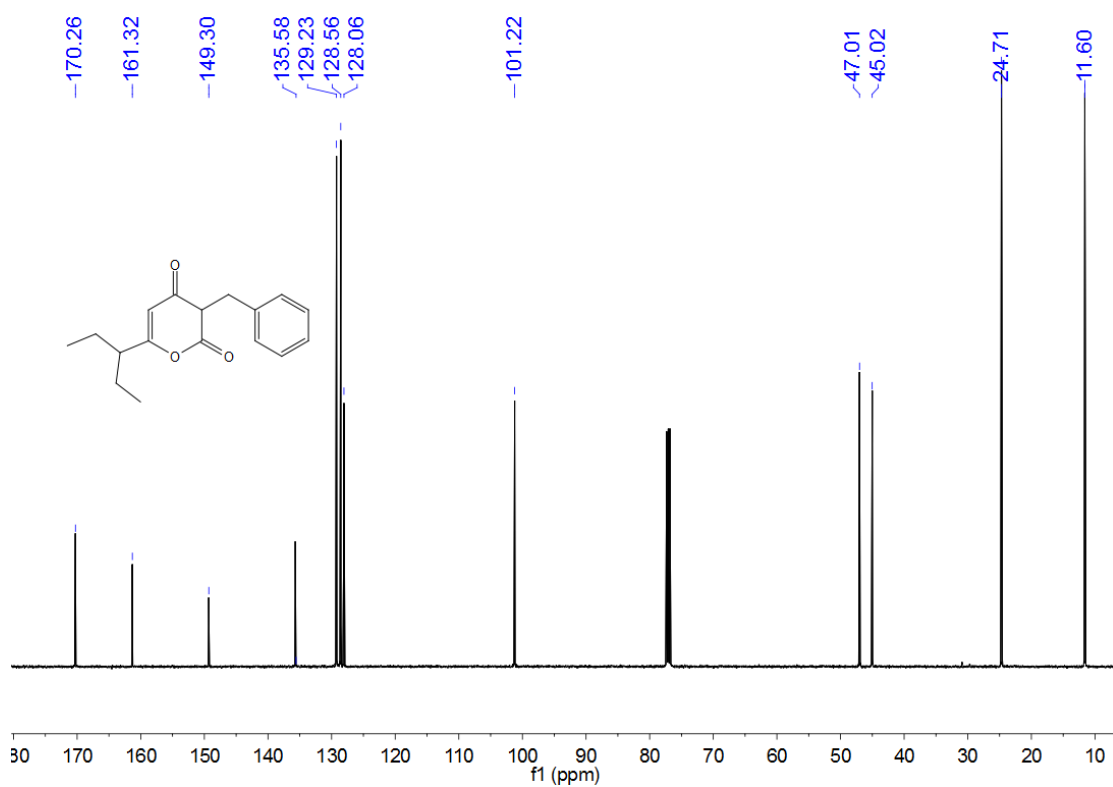



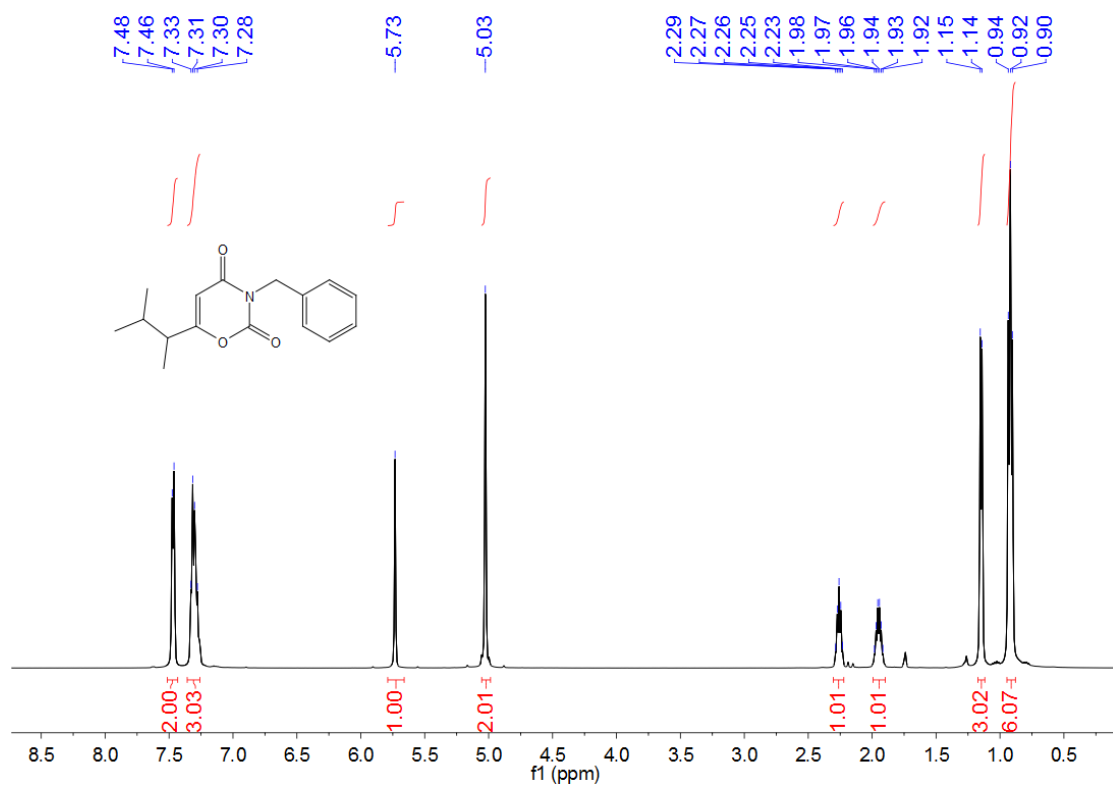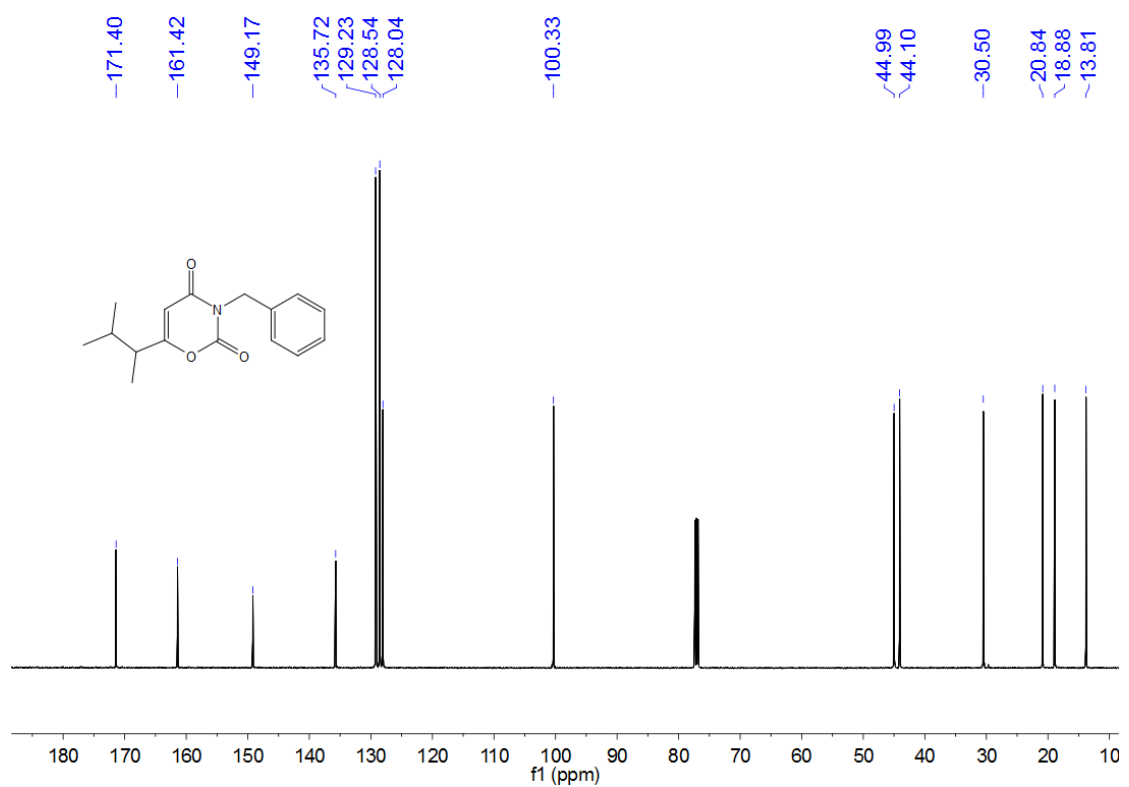

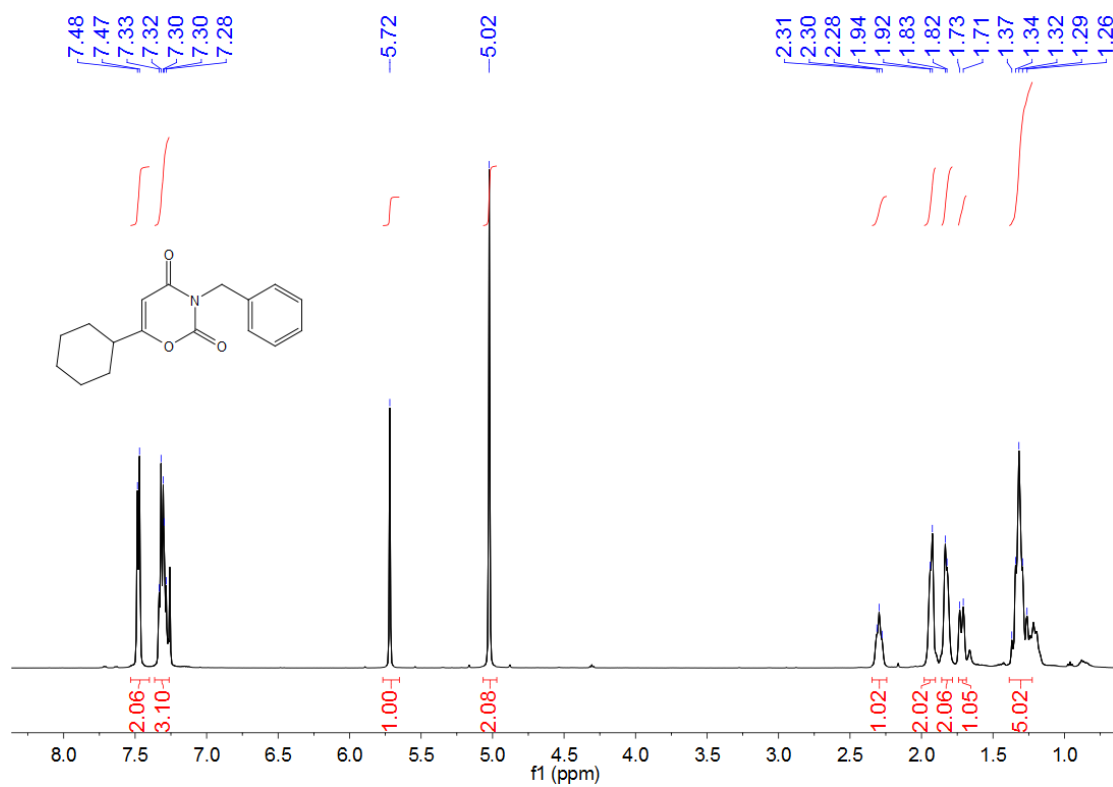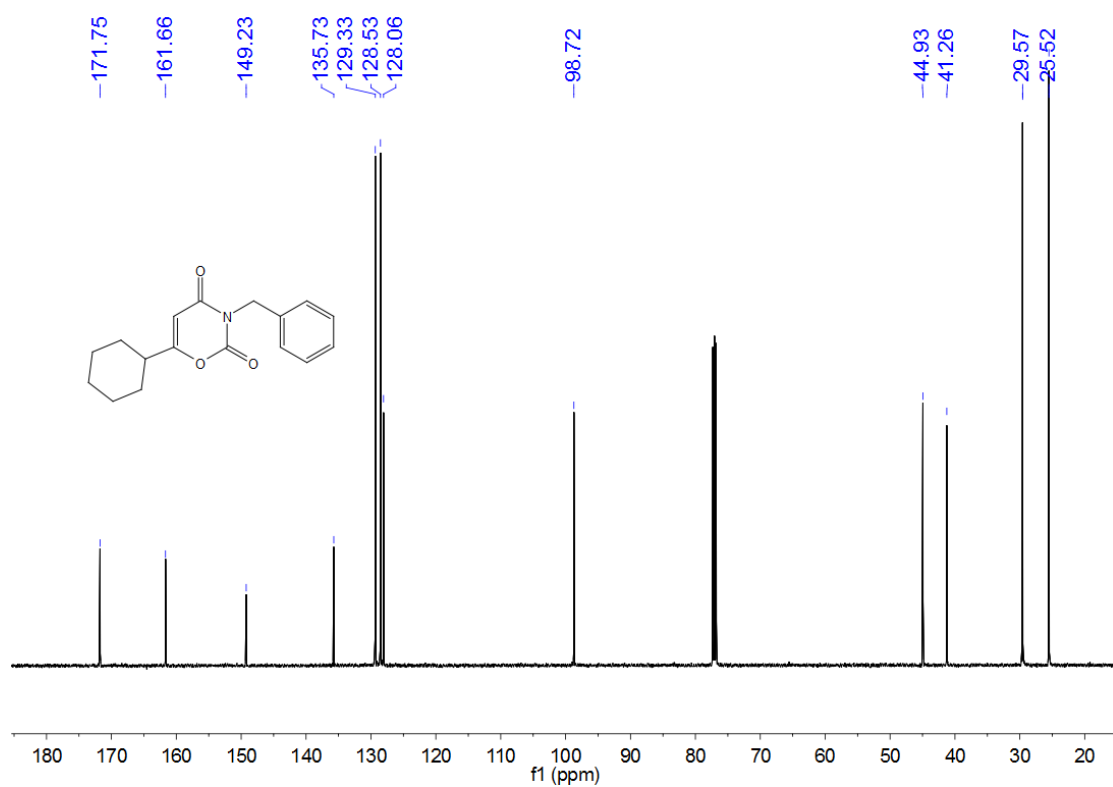

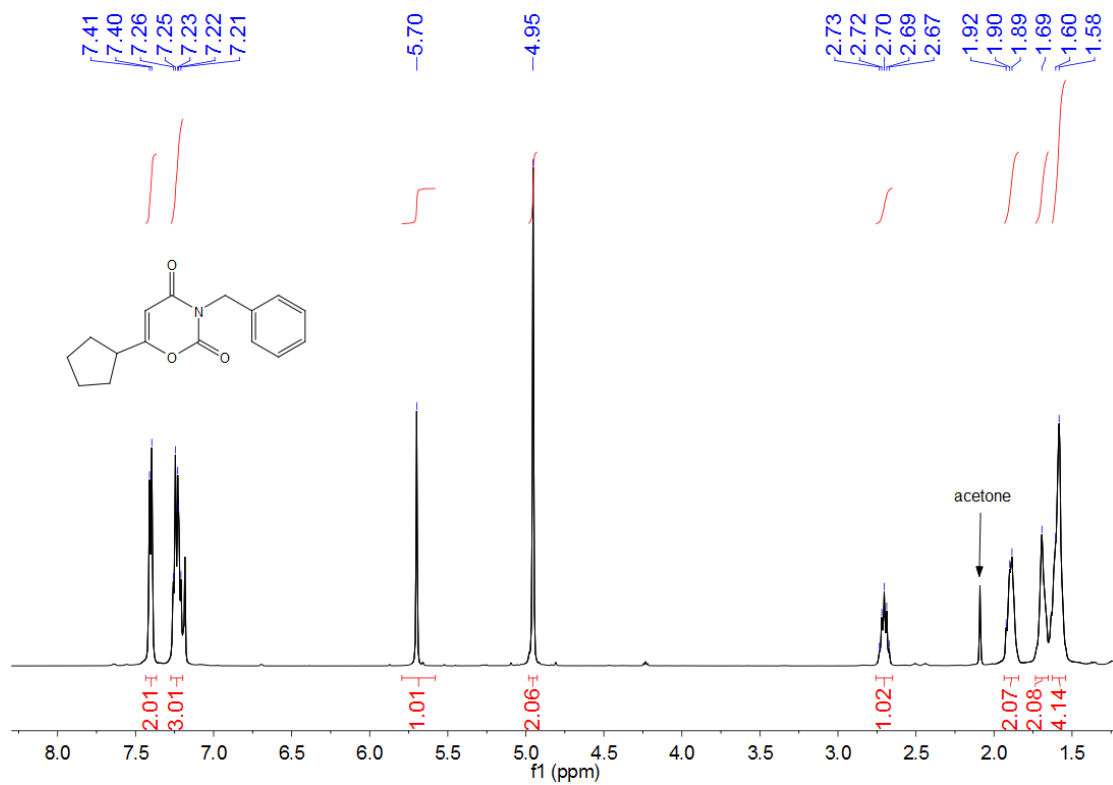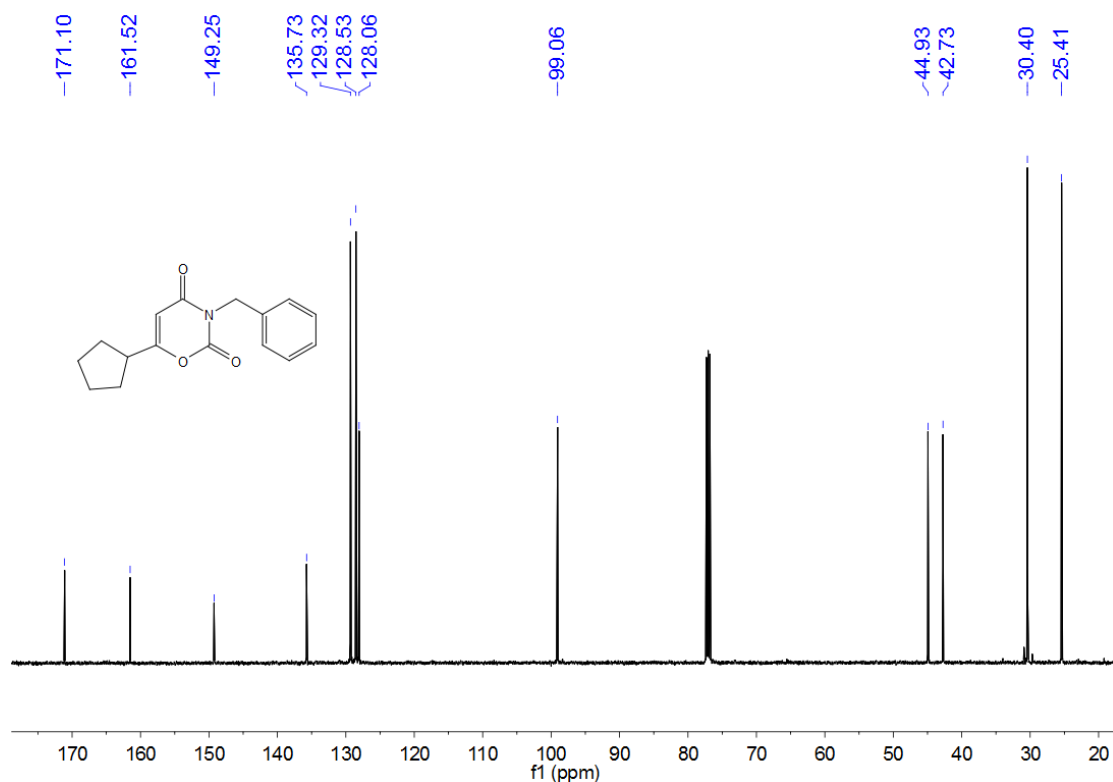

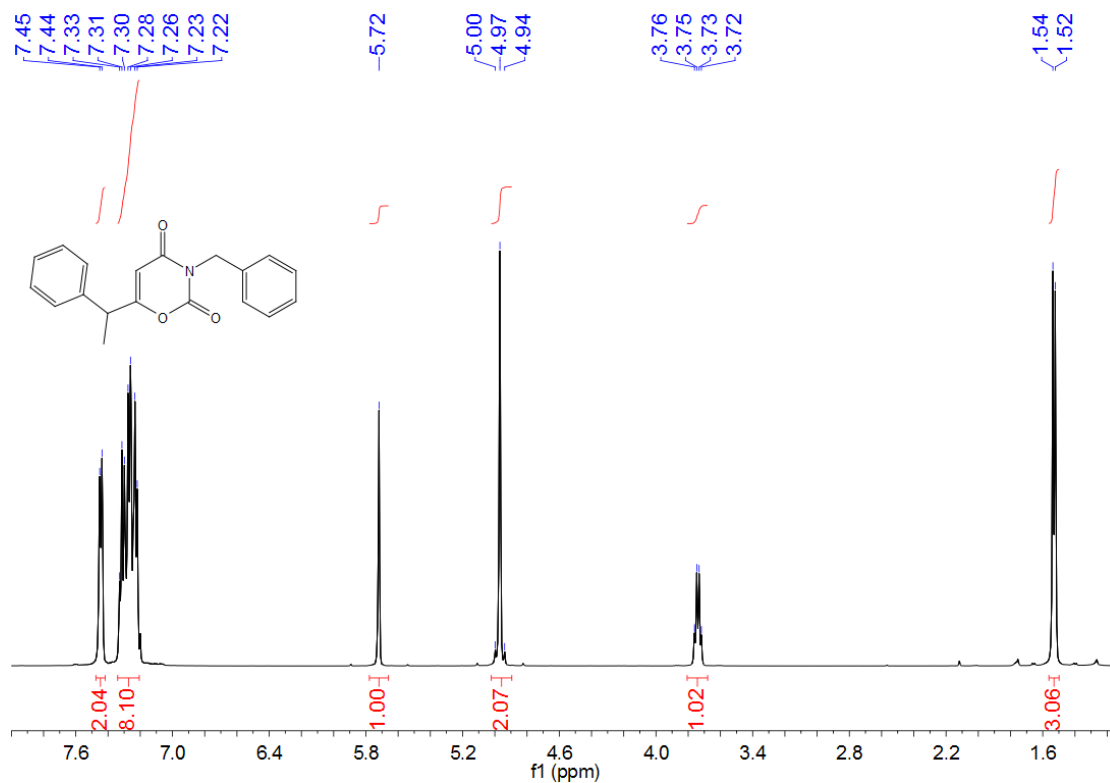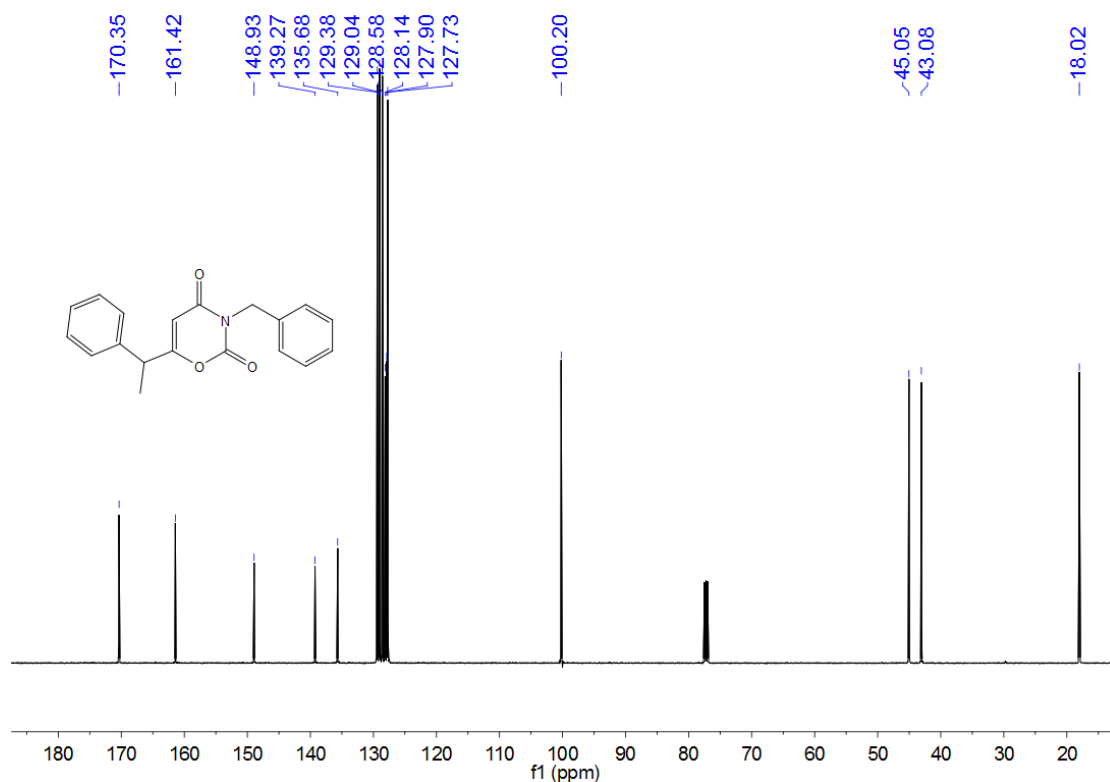

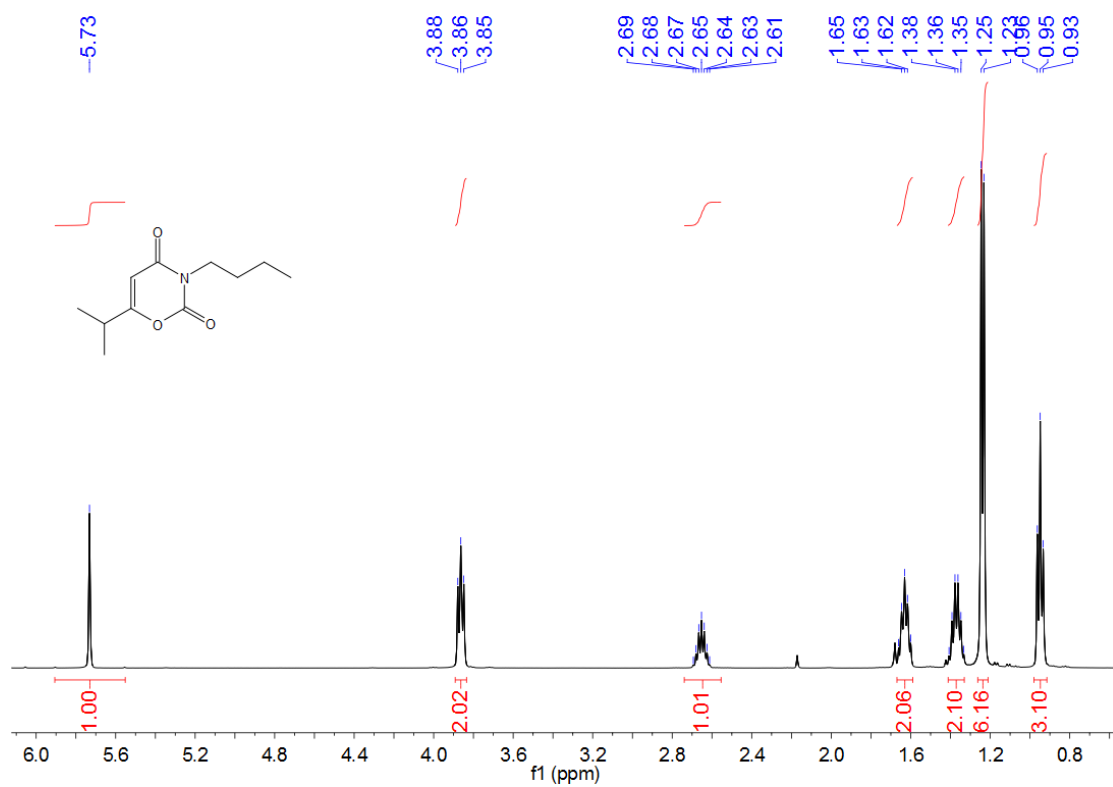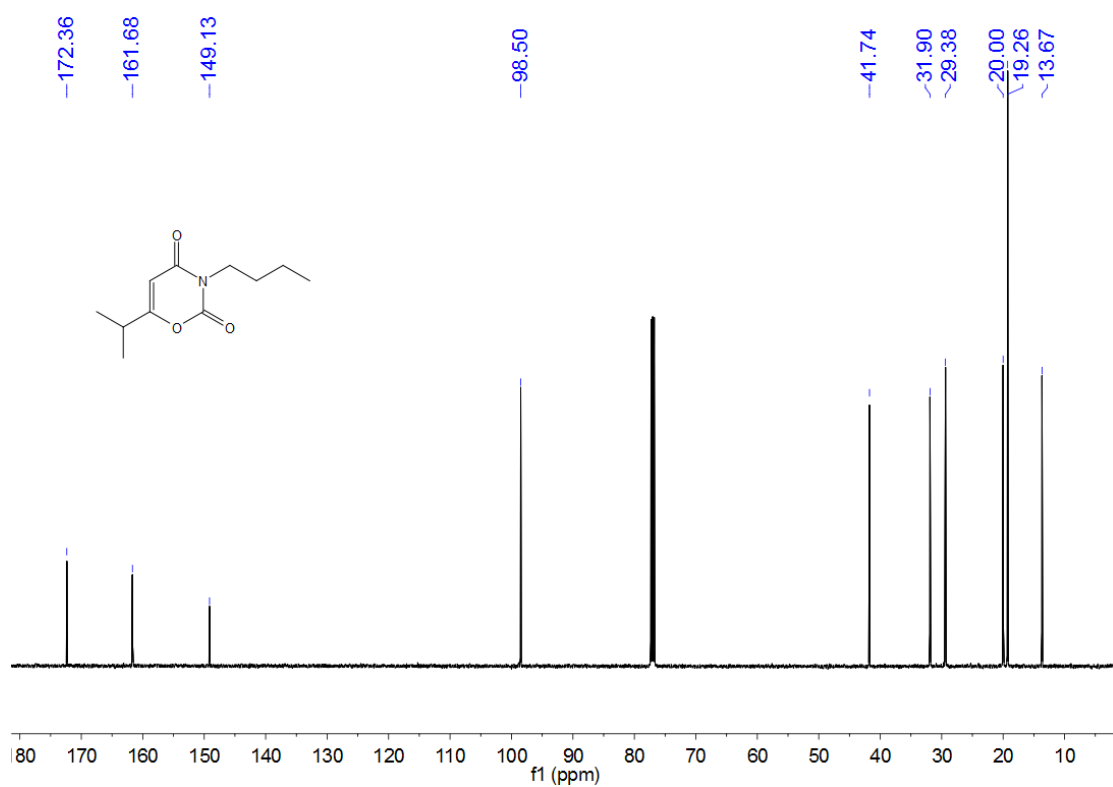

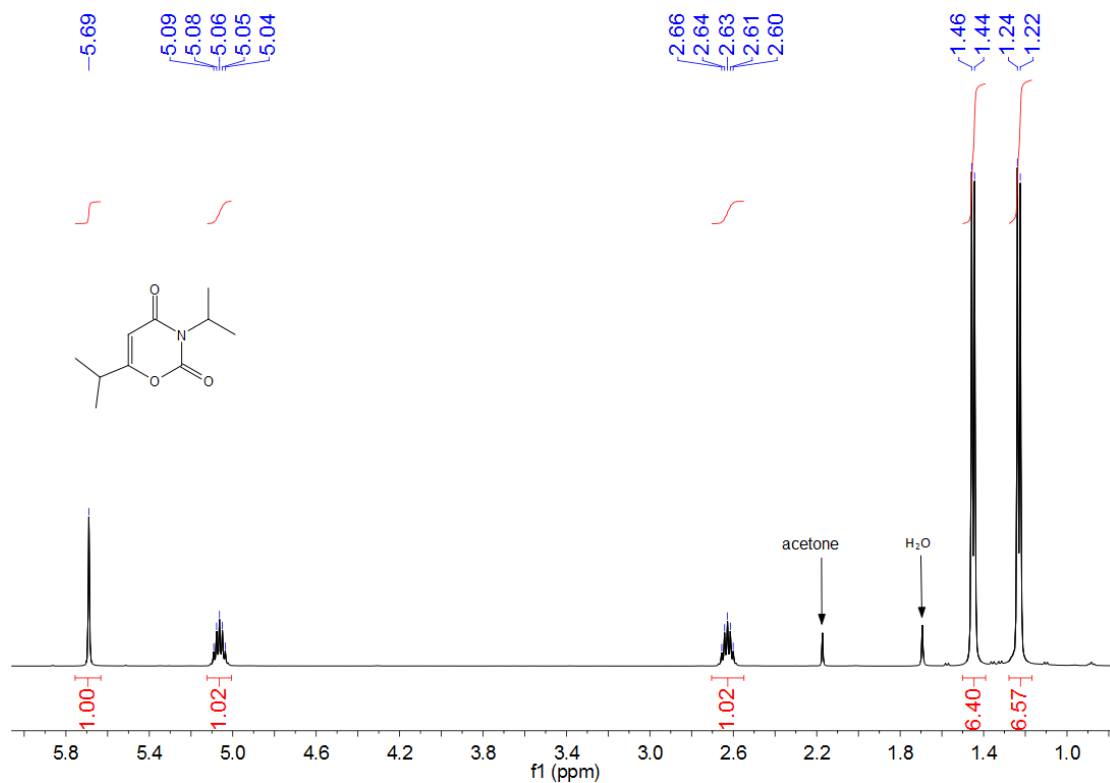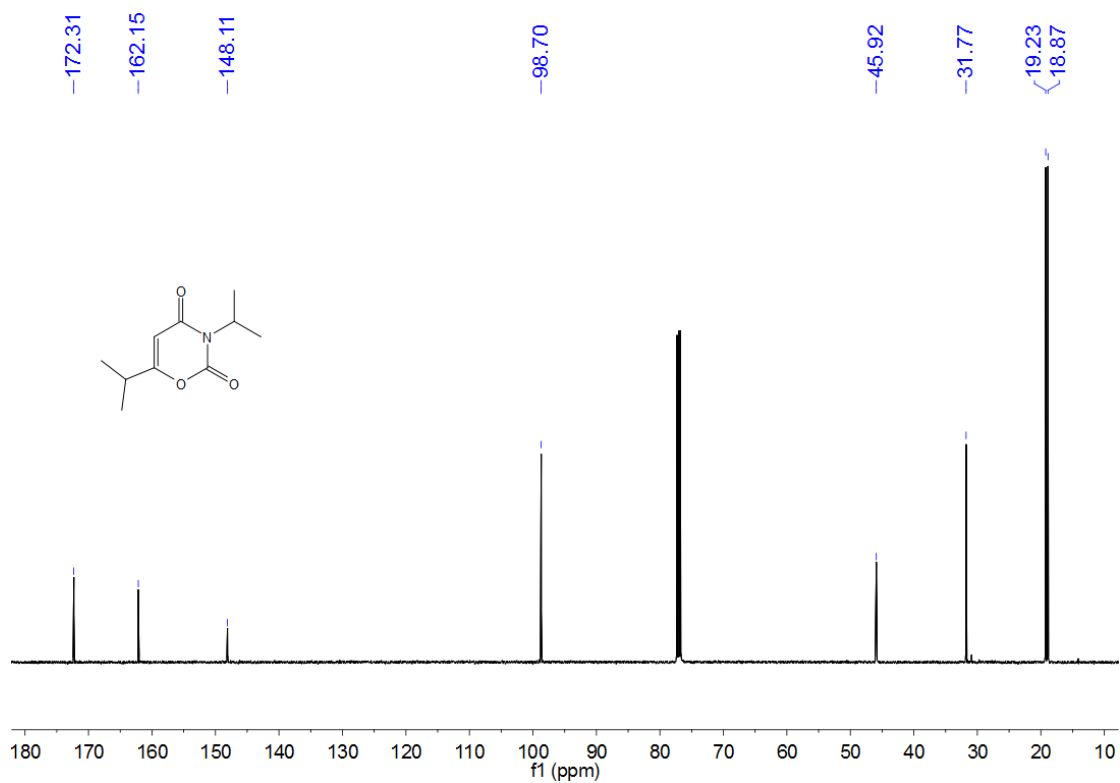

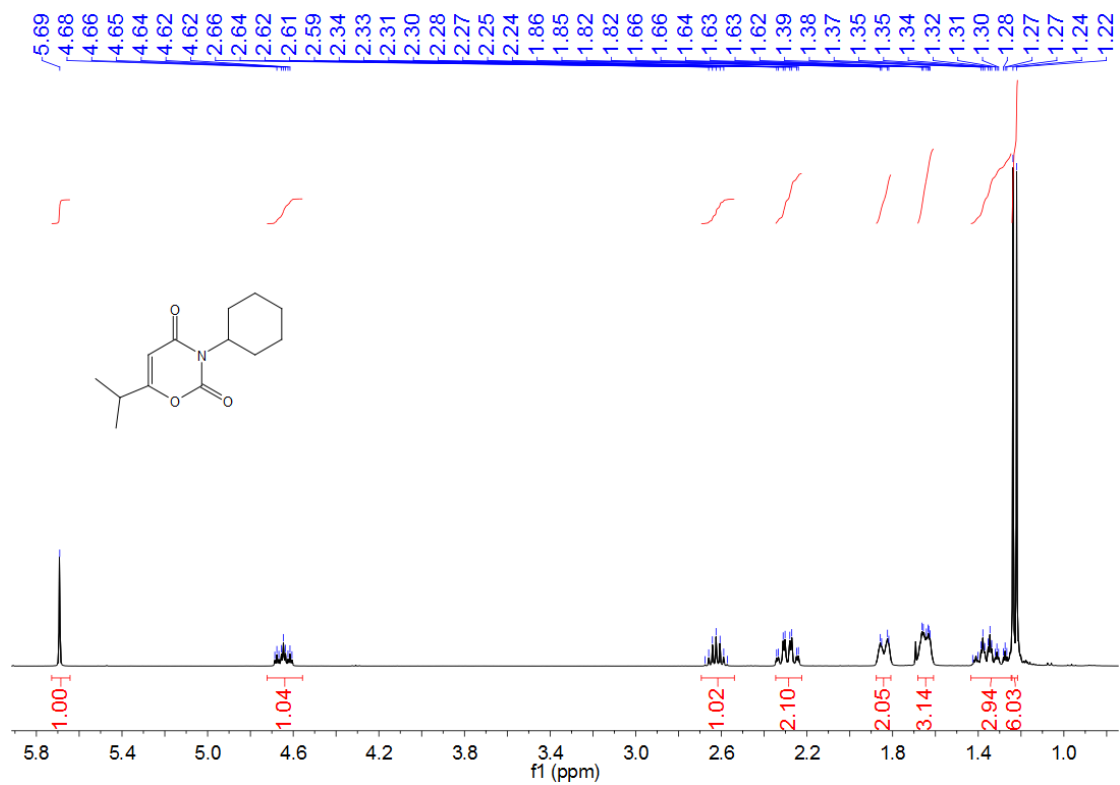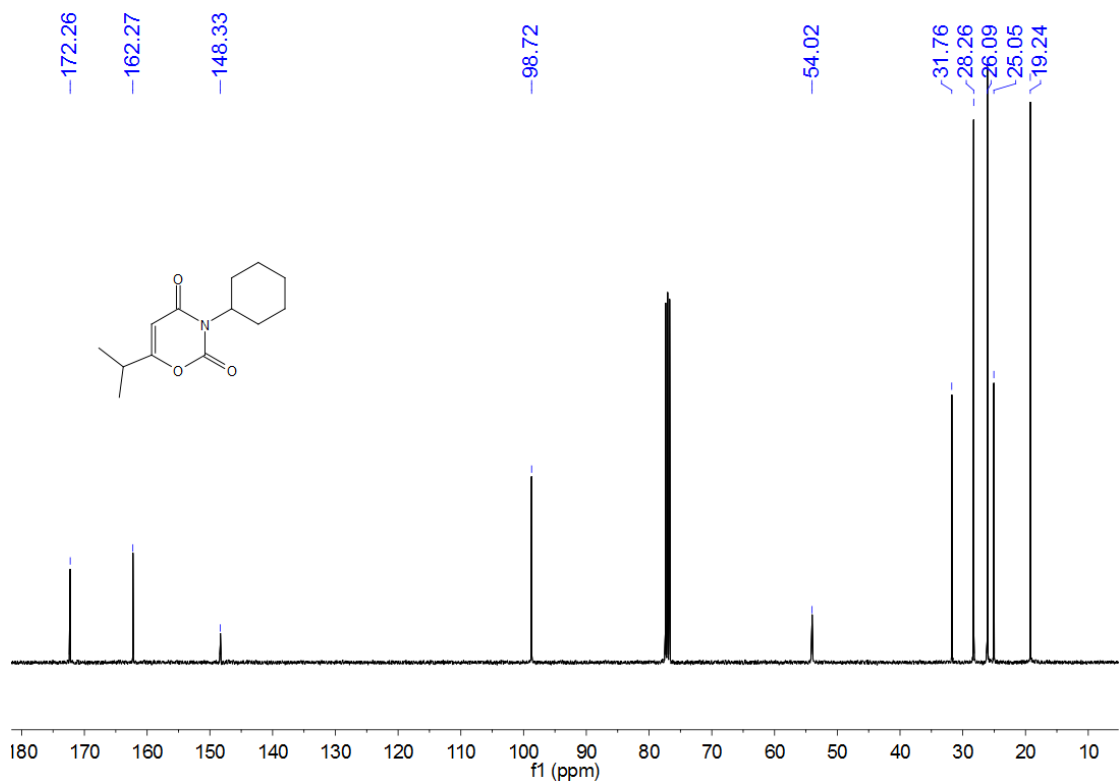

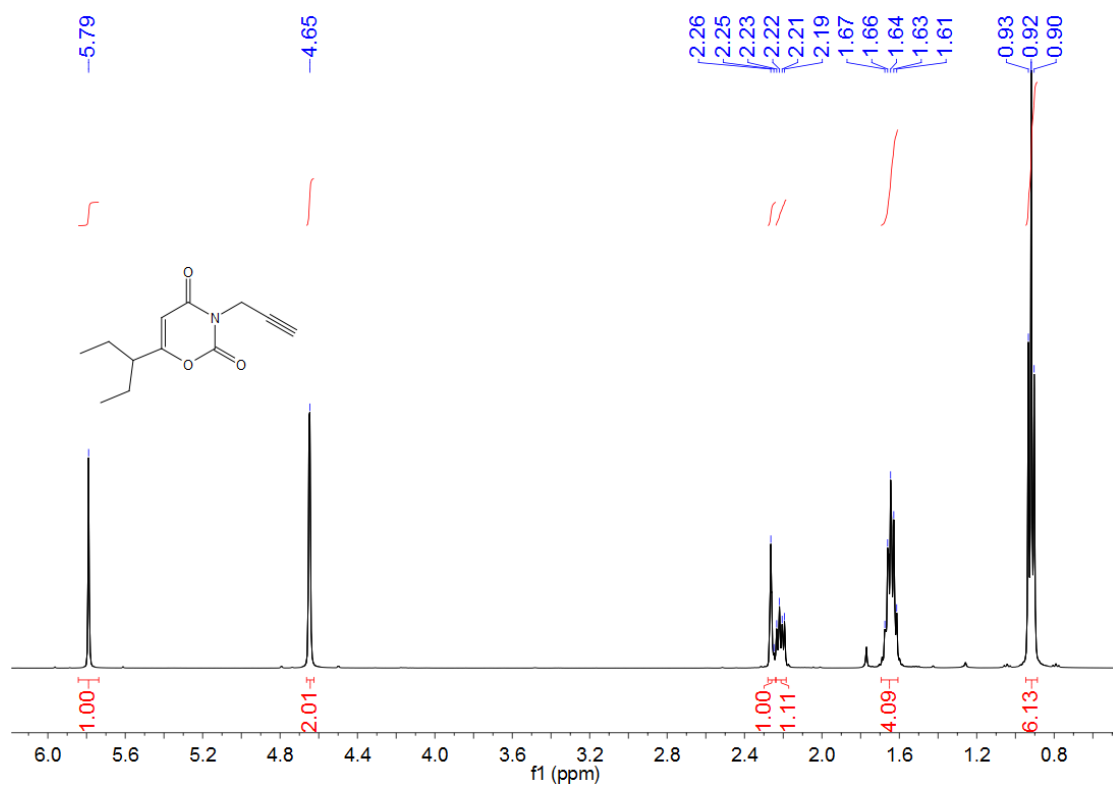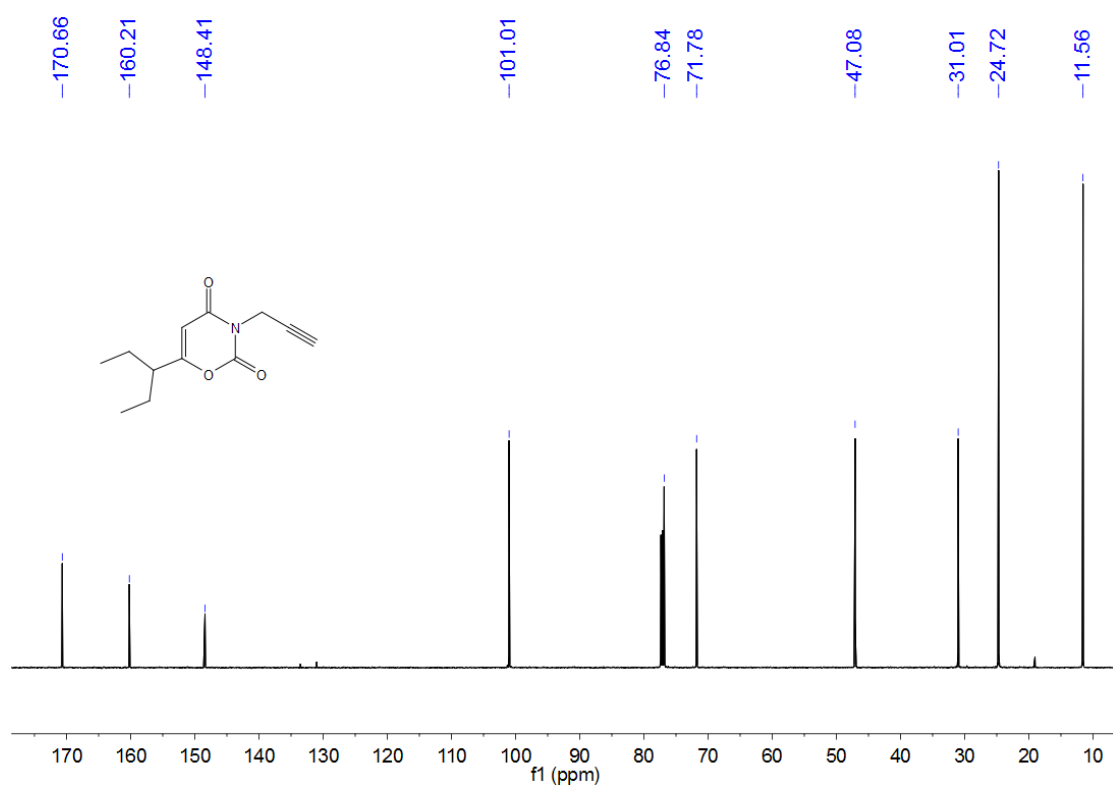



Oct30-2017  
zhangrui  
lvxiaobing

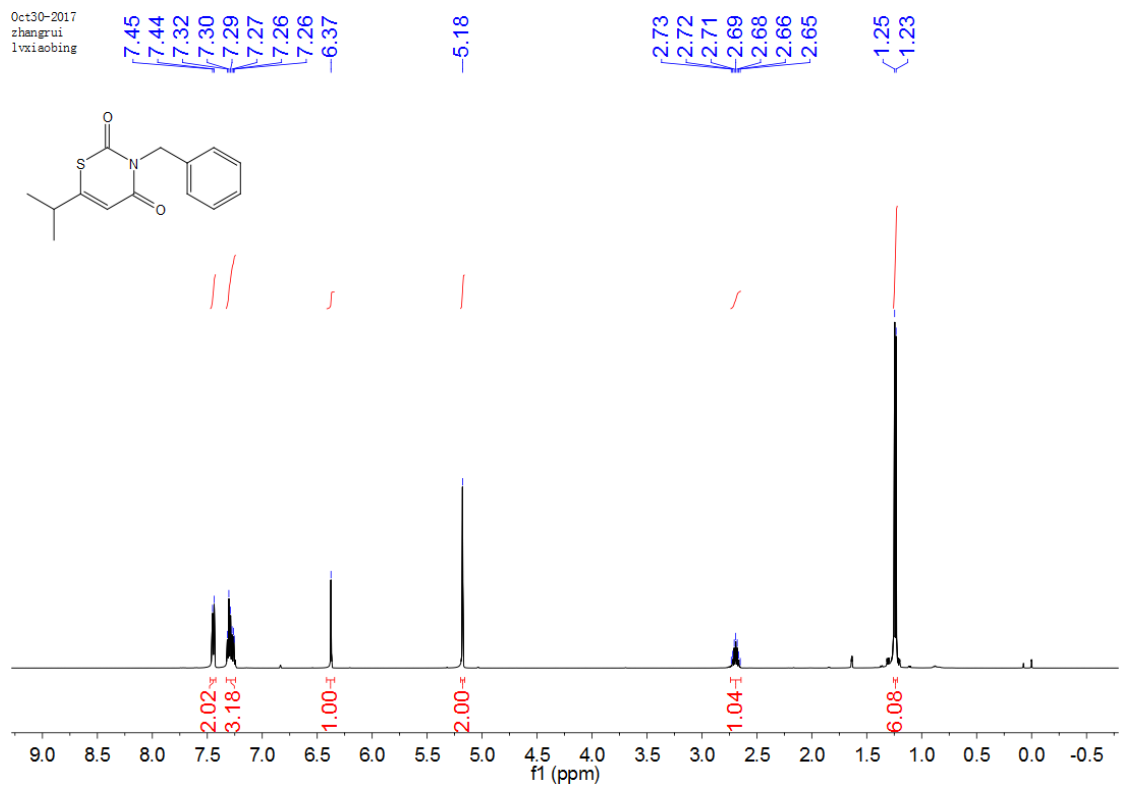

Oct30-2017  
zhangrui  
lvxiaobing lh

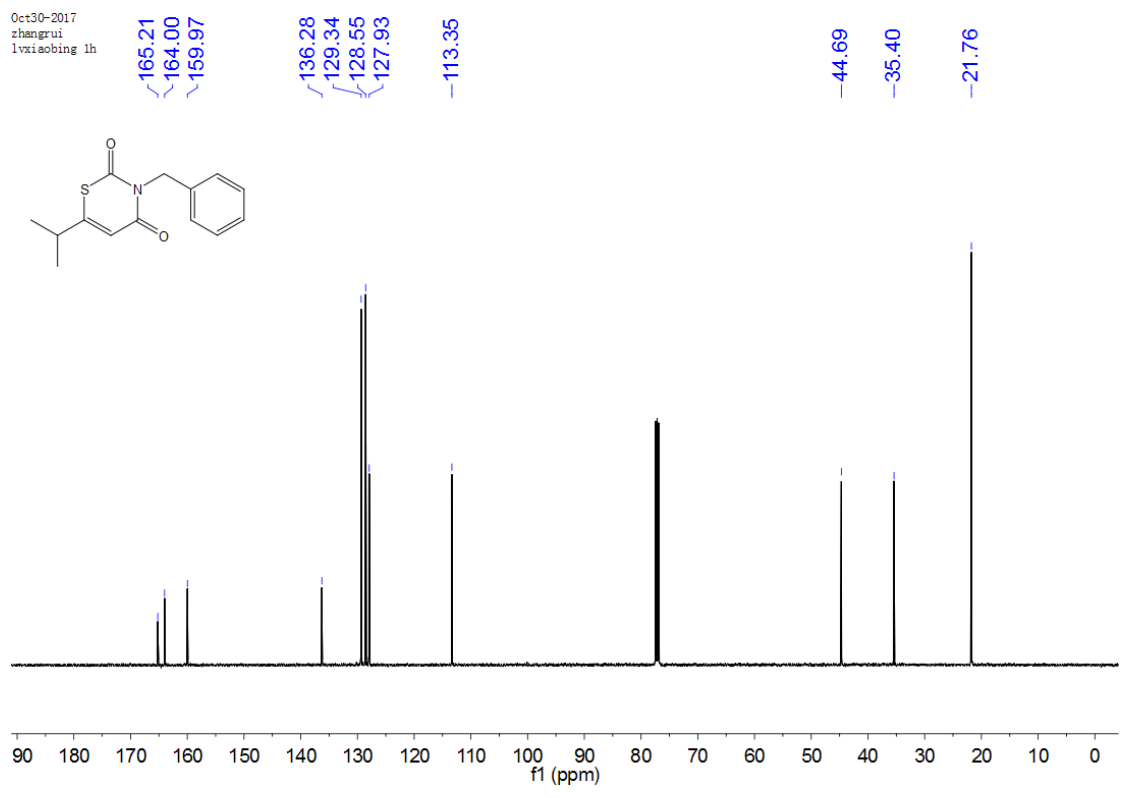

May14-2018  
zhangrui  
lvxiaobing lh

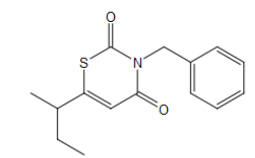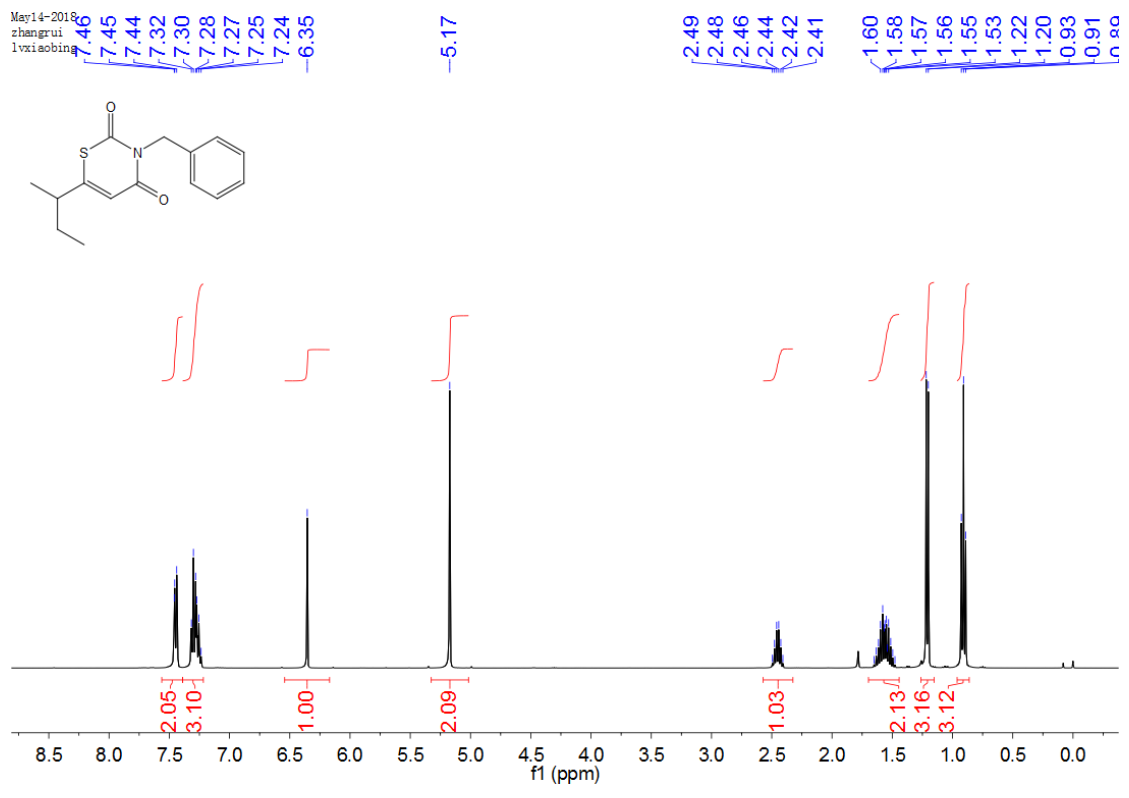

May14-2018  
zhangrui  
lvxiaobing lh

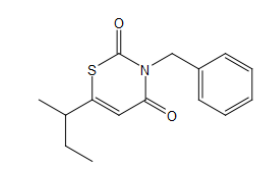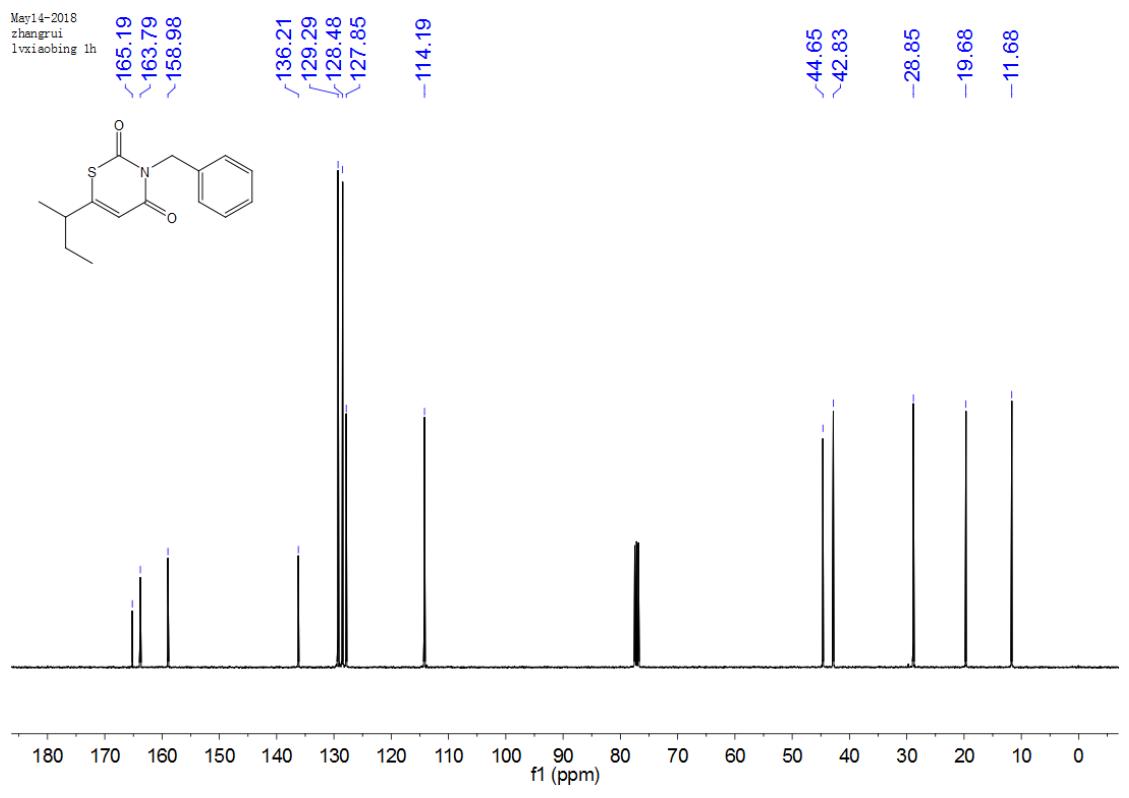

180524-87  
 zr-c-31  
 1H NMR in CDCl3

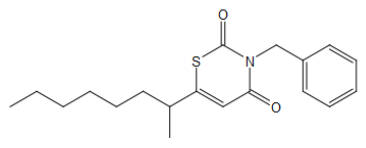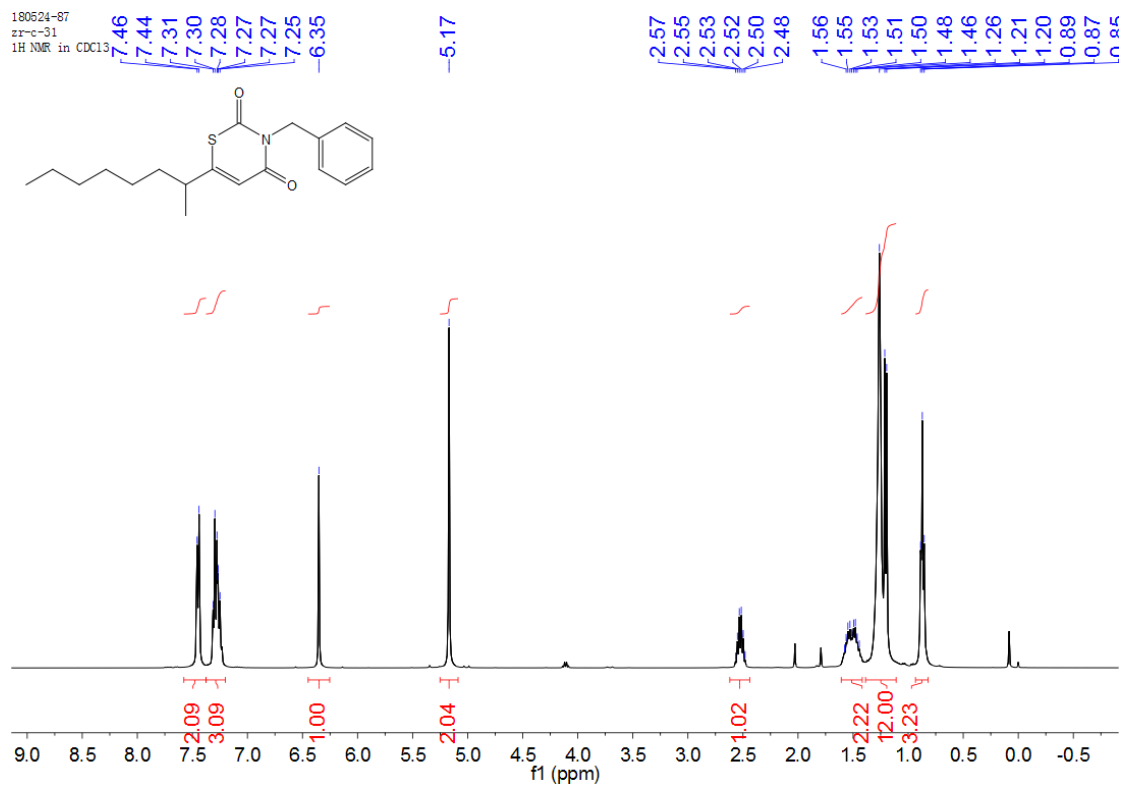

ZR-C-31-3C IM  
 zr-c-31-c  
 1H NMR in CDCl3

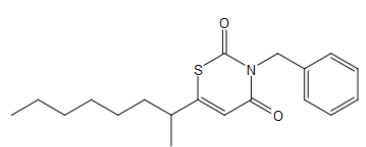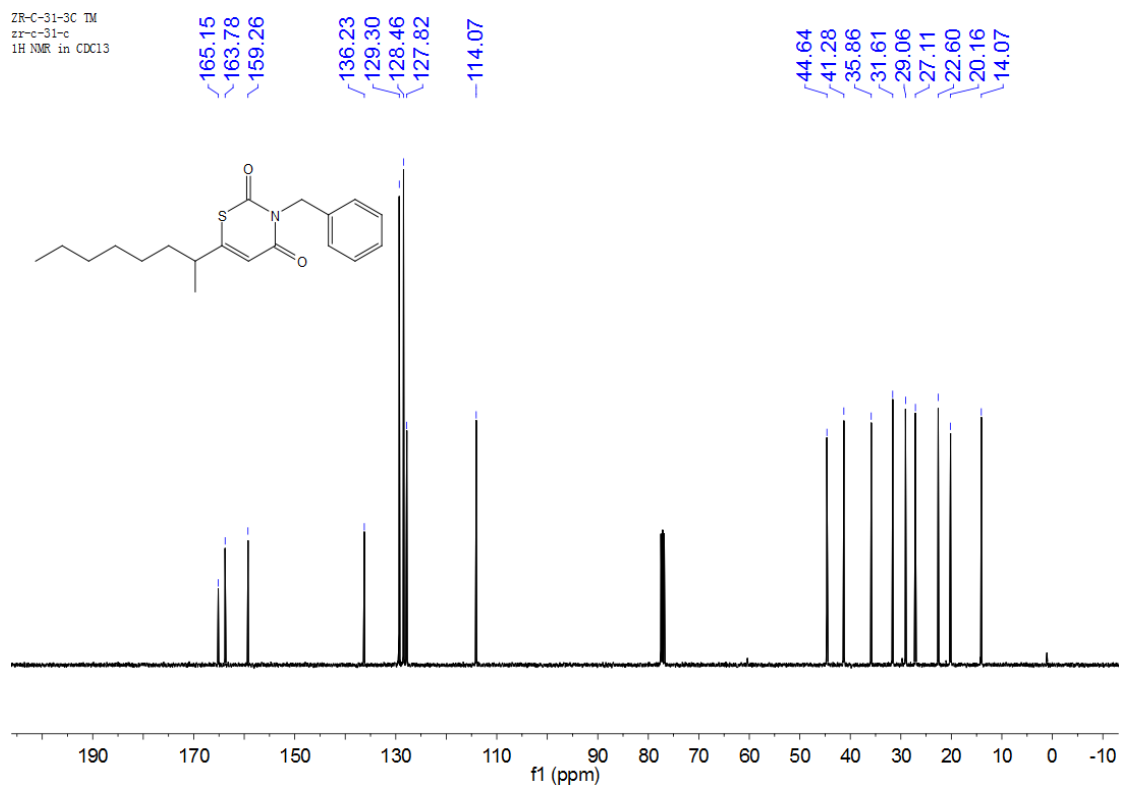

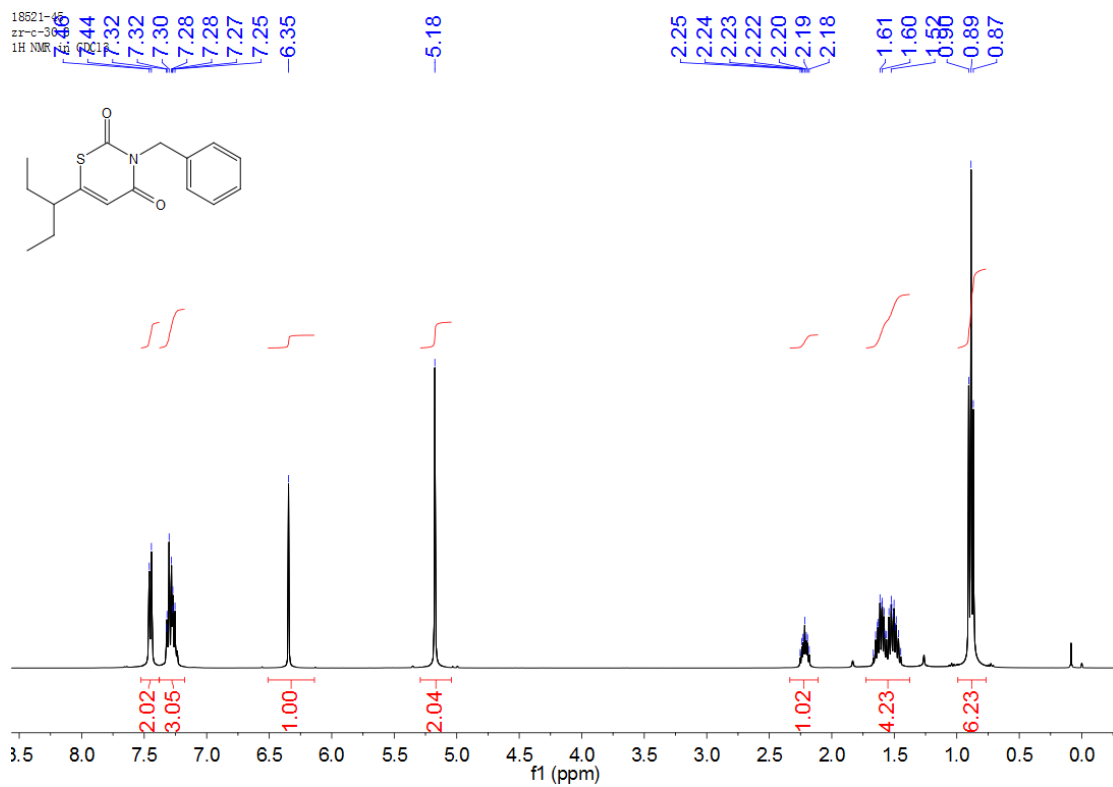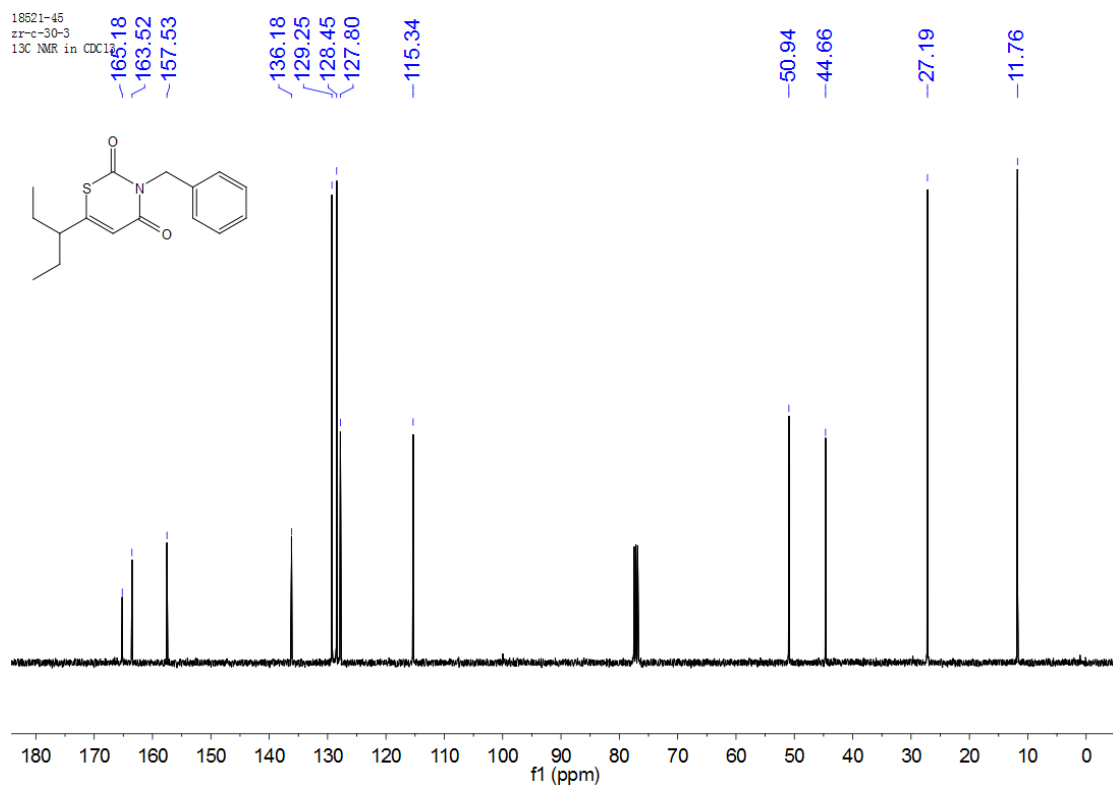

Jun22-2018  
zhongrui  
lvxiaobing lh

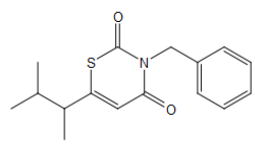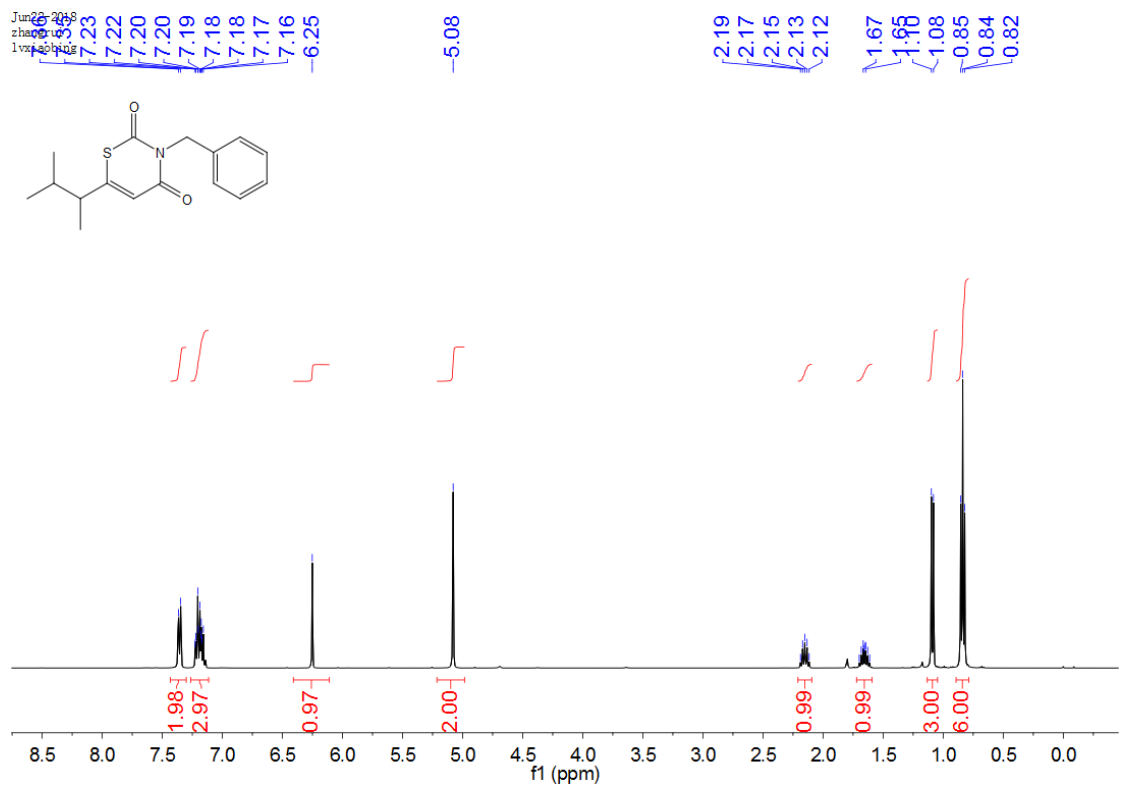

Jun22-2018  
zhongrui  
lvxiaobing lh

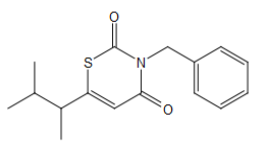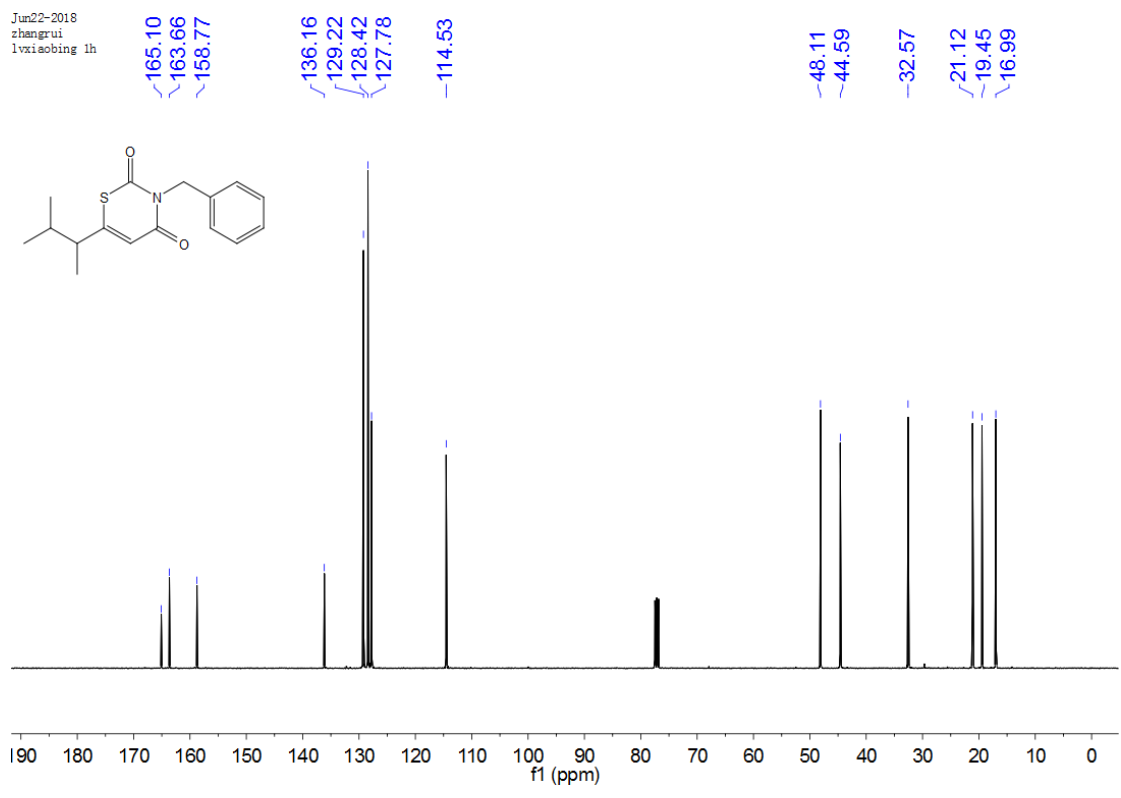

ZR-C-29 IM  
 zr-c-29-h tm  
 1H NMR in CDCl3

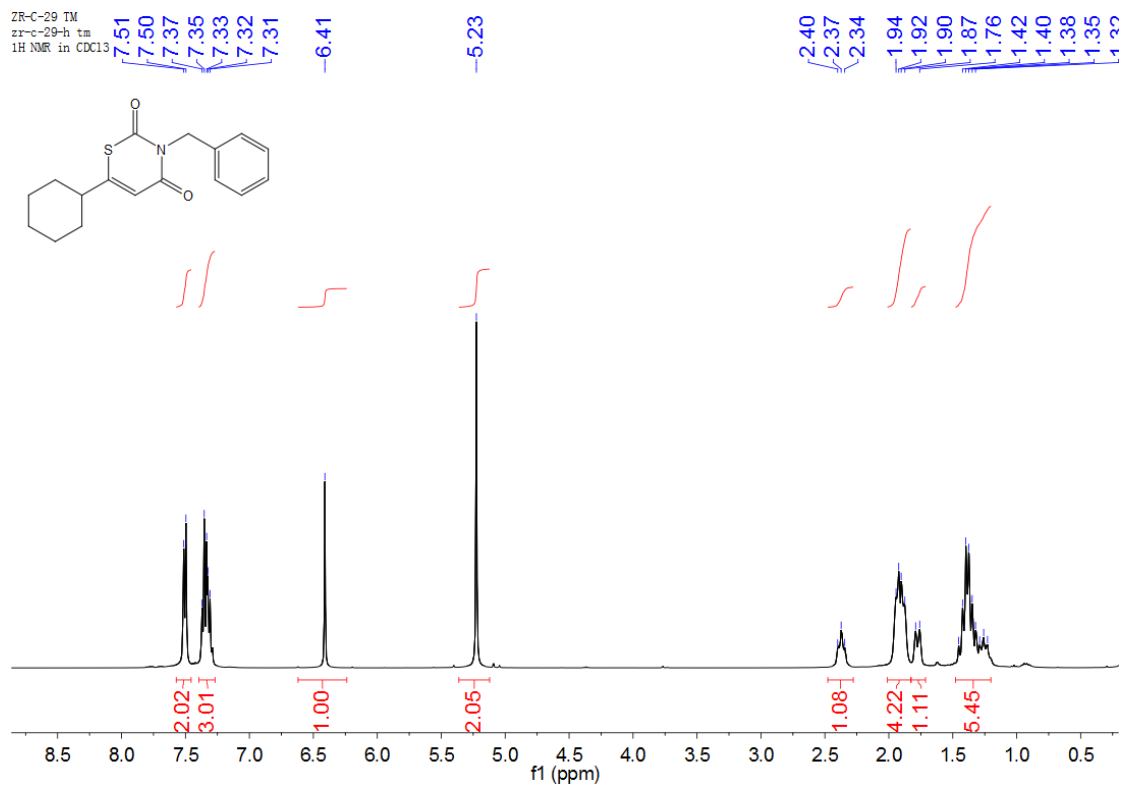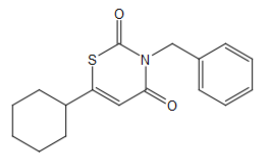

ZR-C-29 IM  
 zr-c-29-c tm  
 1H NMR in CDCl3

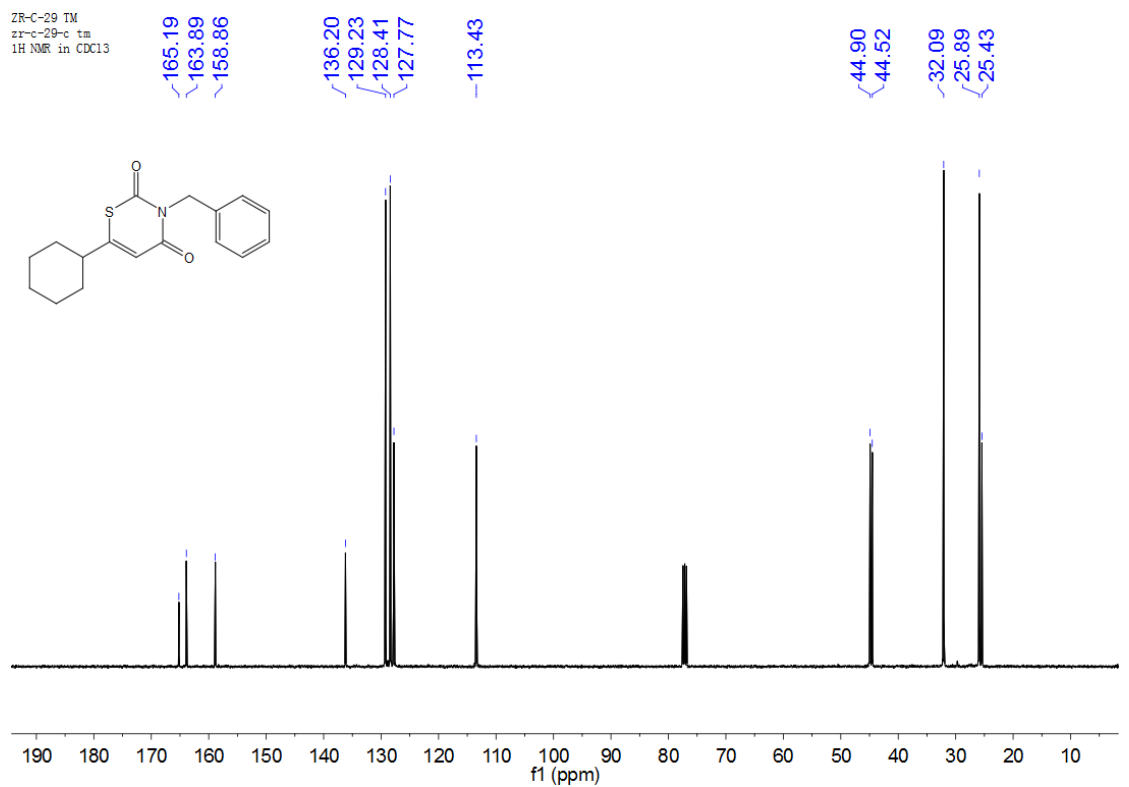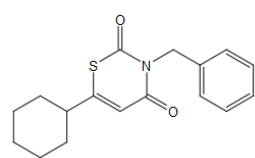

Jun15-2018  
zhangrui  
lvxiaobing

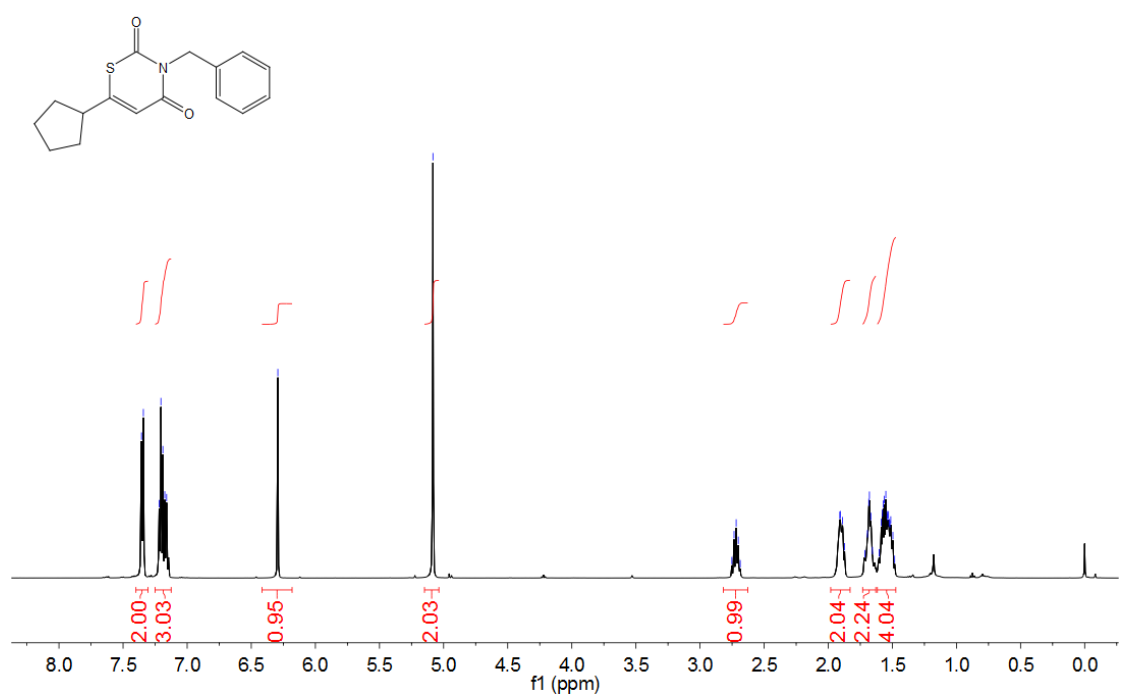

Jun15-2018  
zhangrui  
lvxiaobing

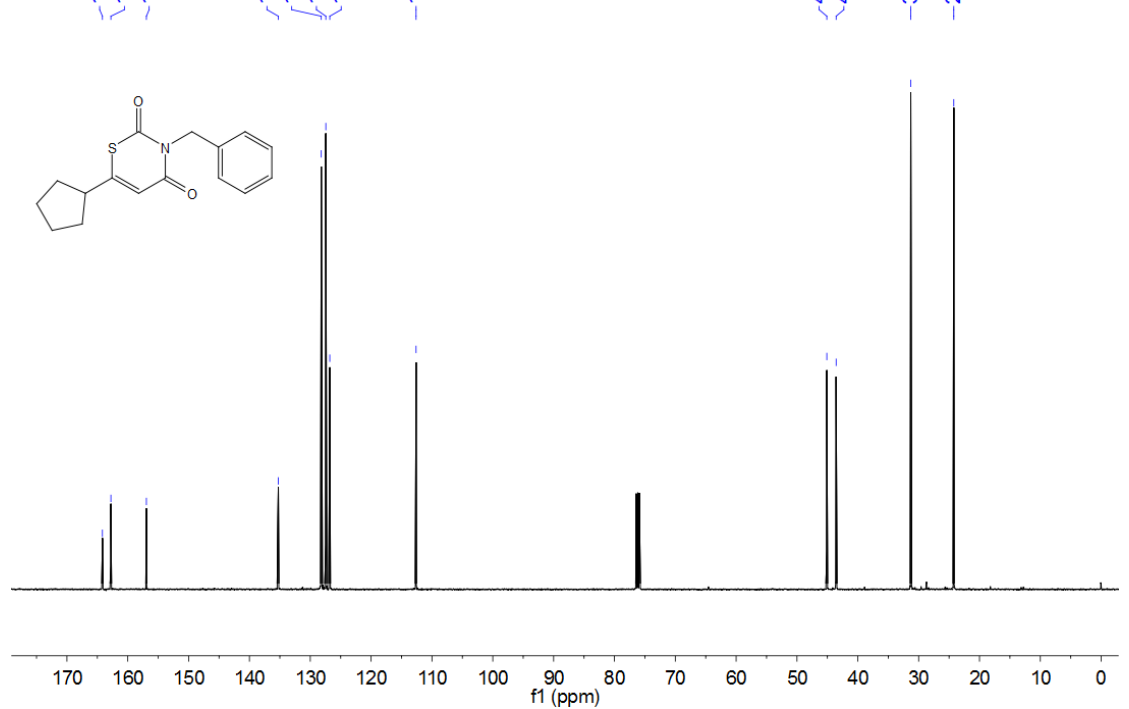

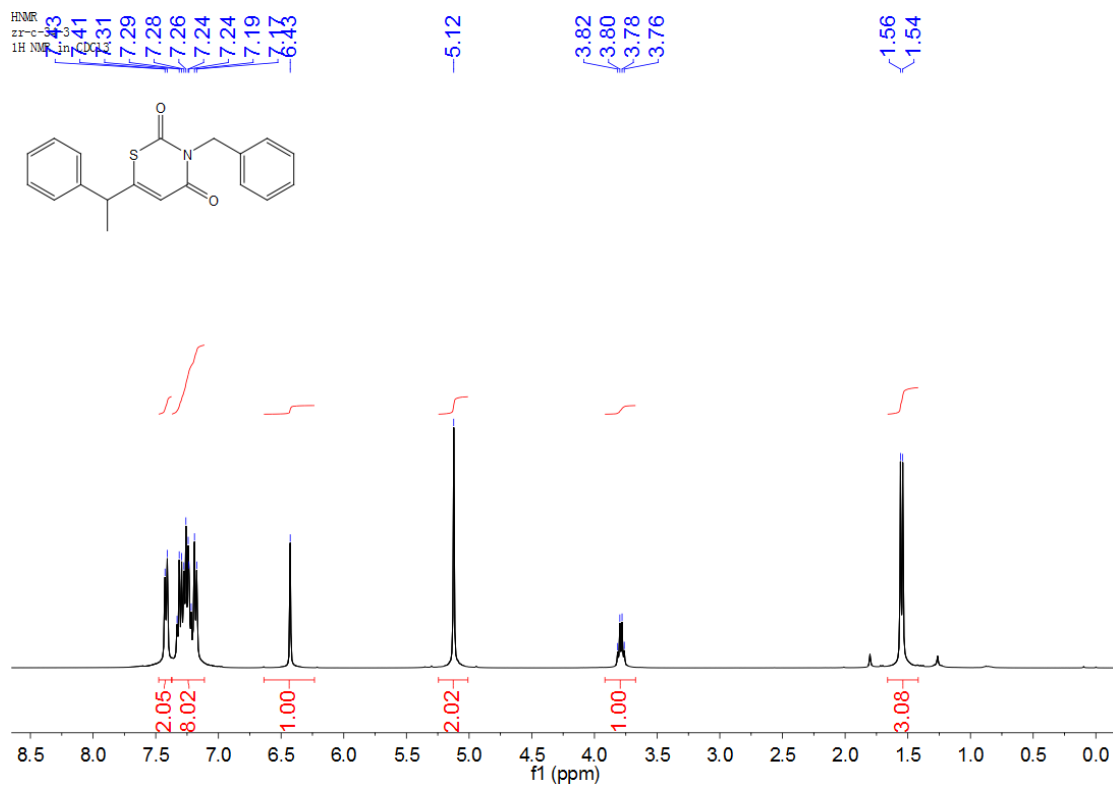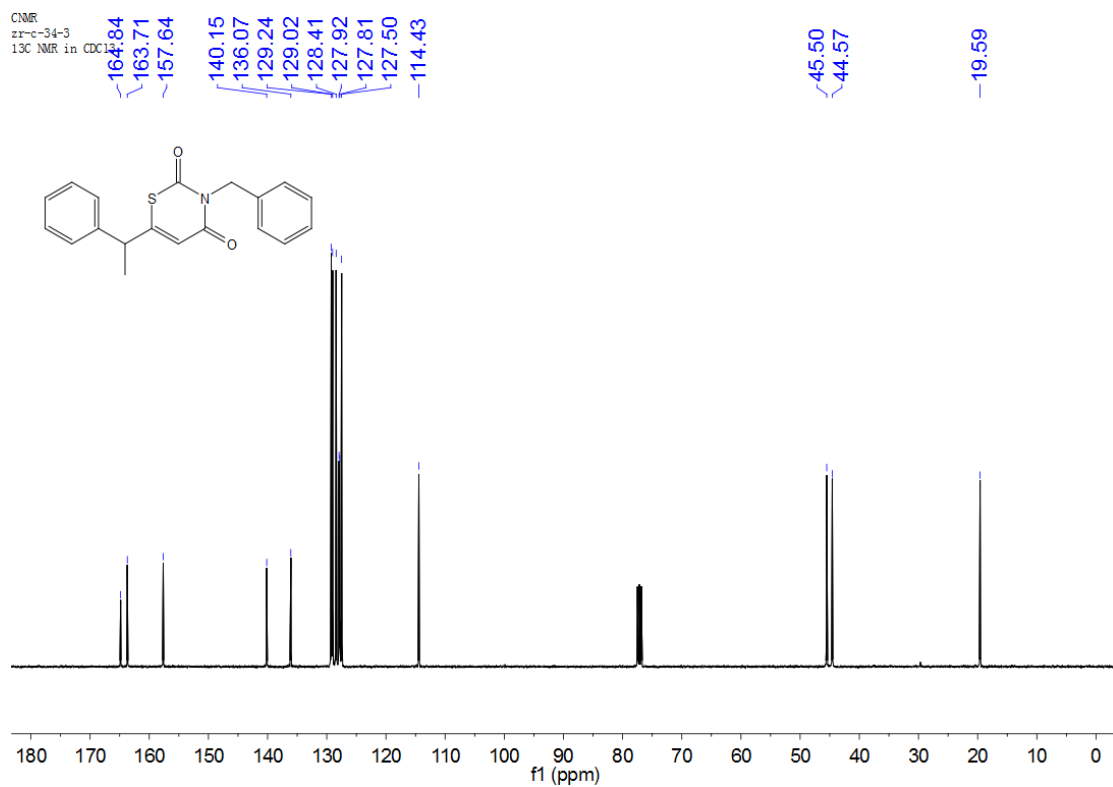



Nov24-2017  
zhang rui  
lv xiao bing

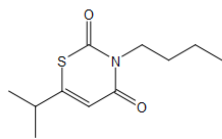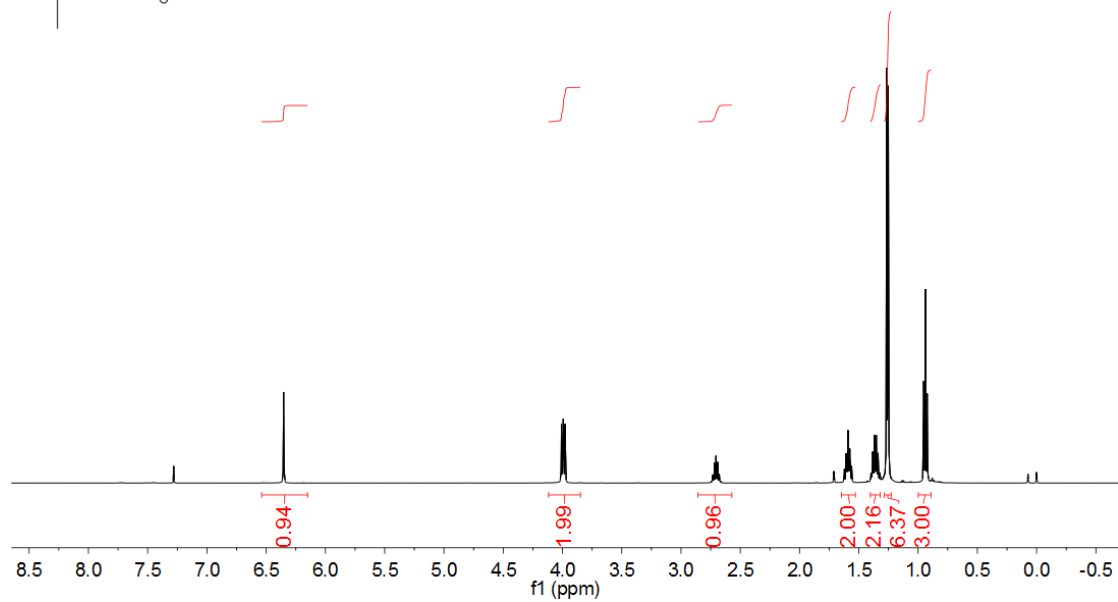

Nov24-2017  
zhang rui  
lv xiao bing

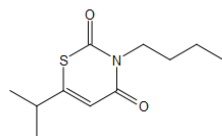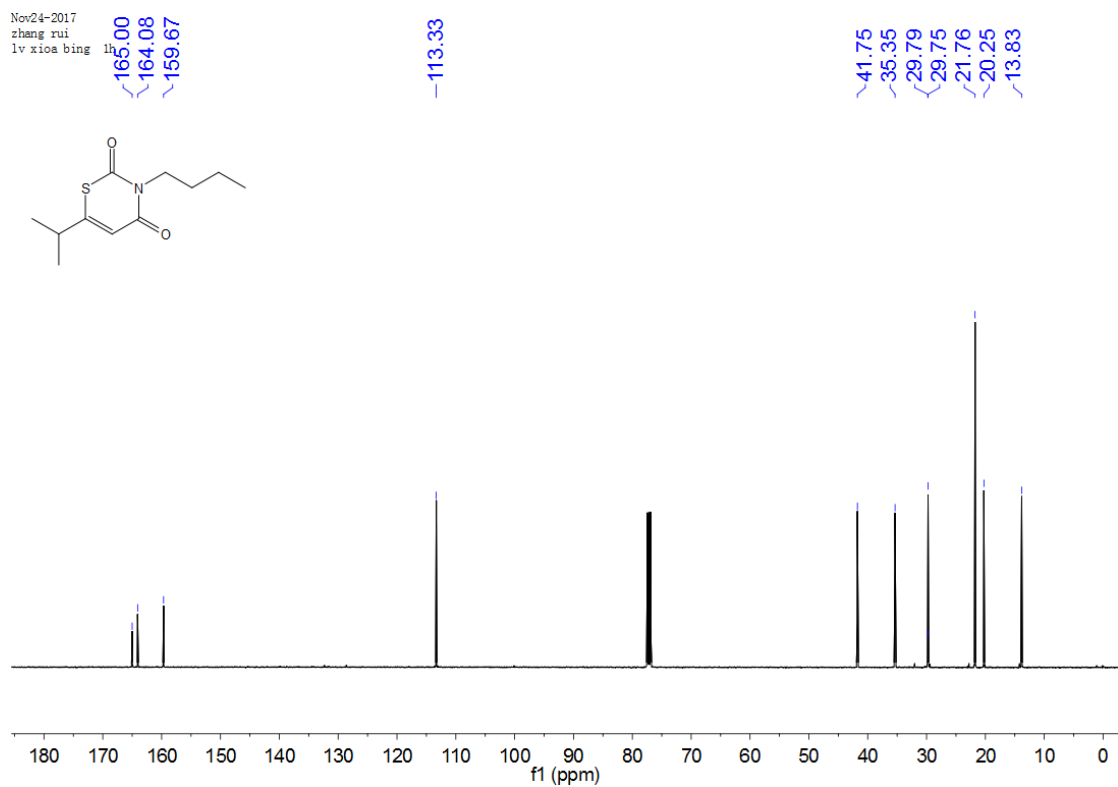

May14-2018  
zhangrui  
lvxiaobing

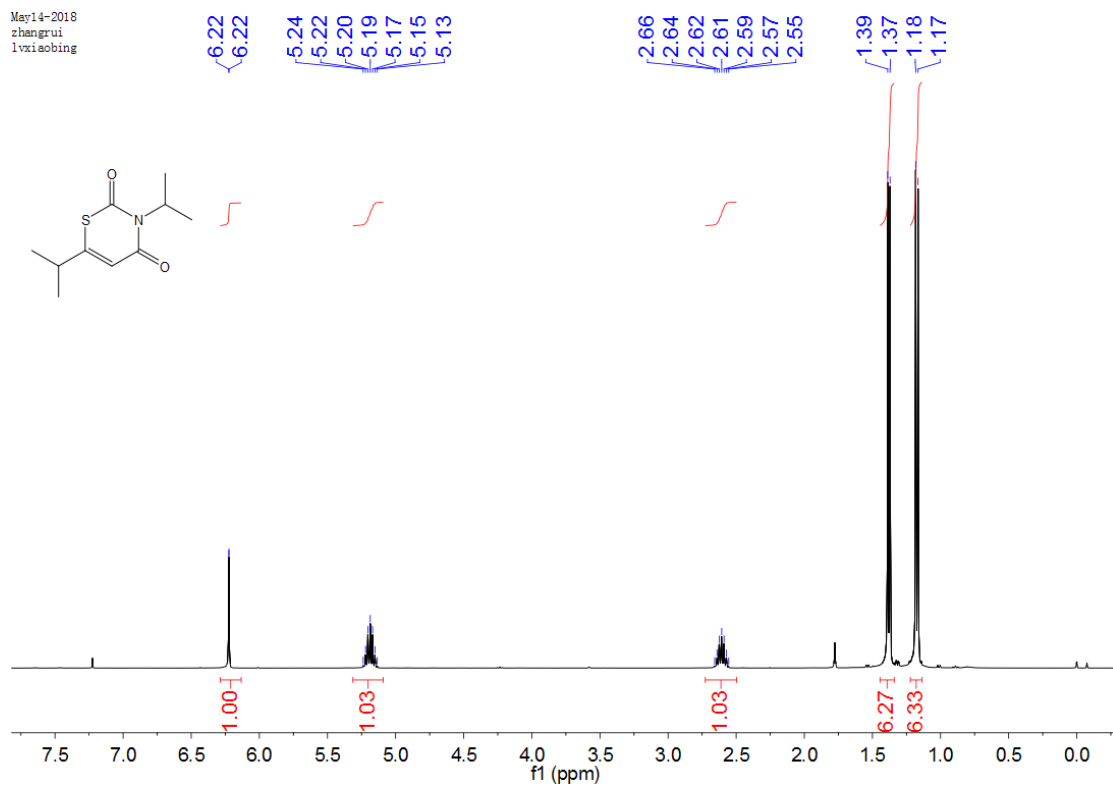

May14-2018  
zhangrui  
lvxiaobing lh

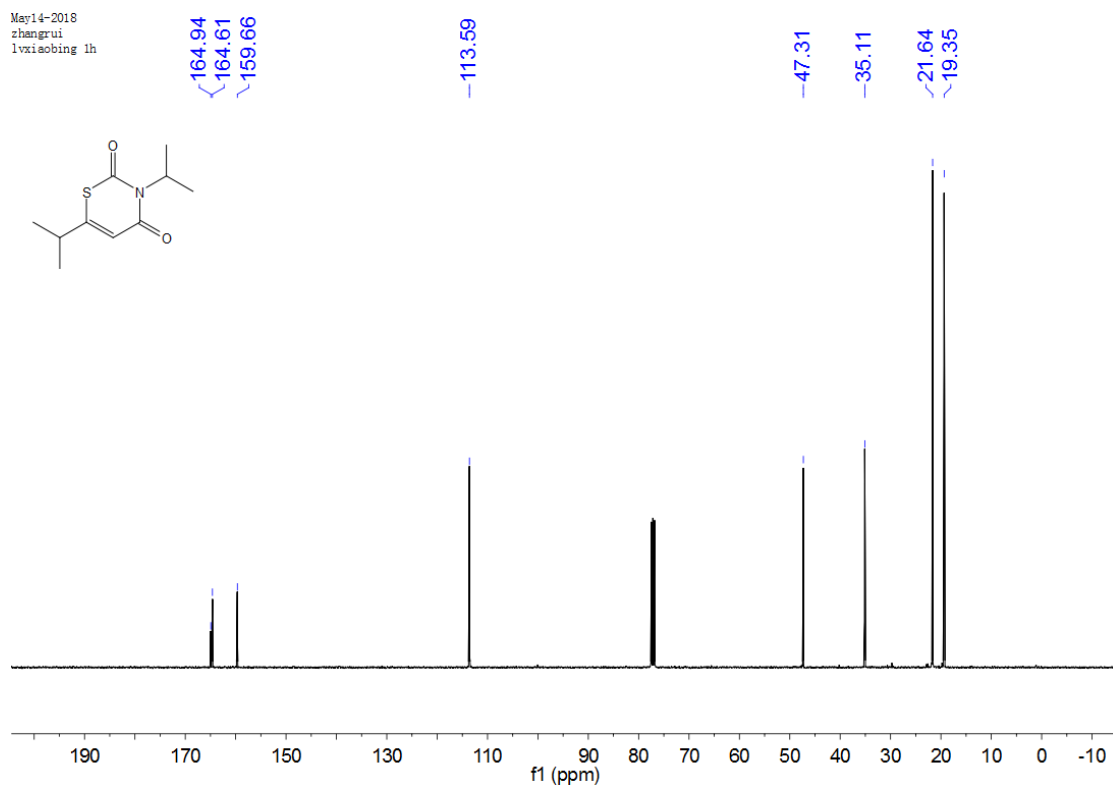

May14-2018  
 zhangrui  
 lvxiaobing lh

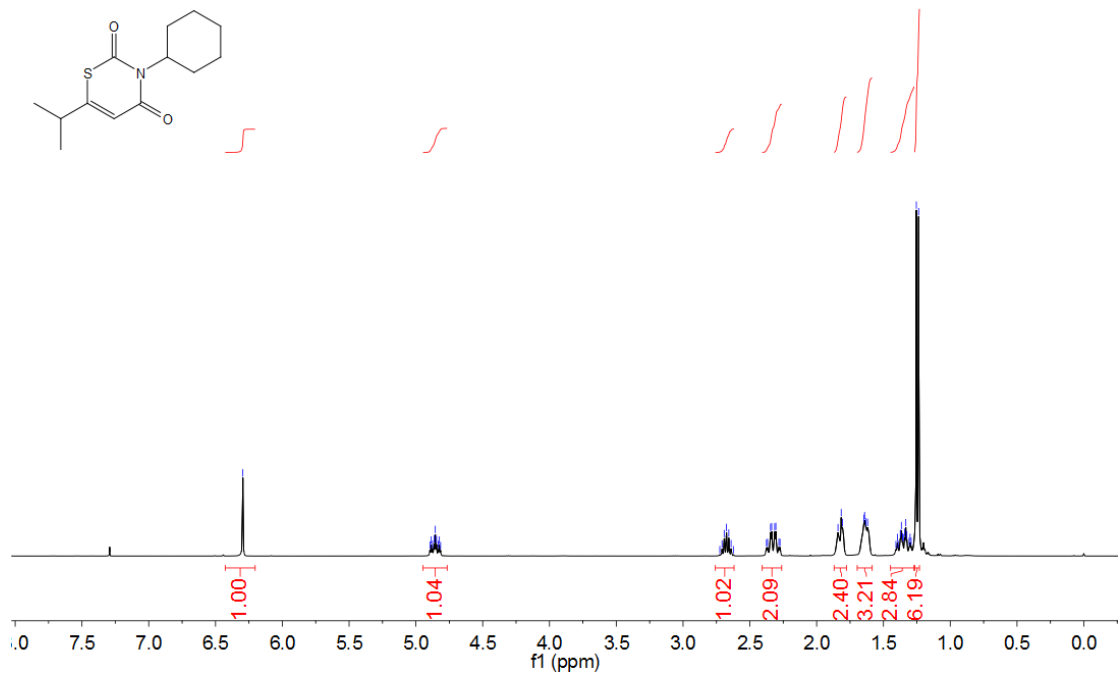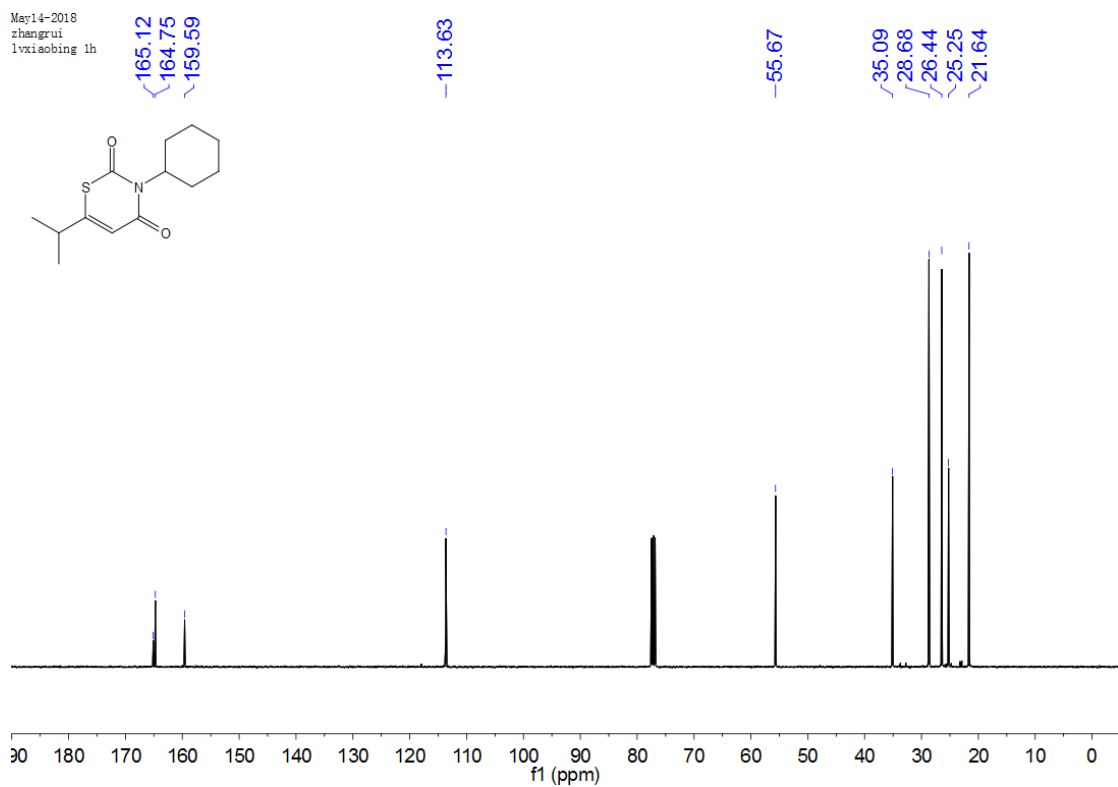

HMR  
zr-c-35-2  
1H in CDCl3

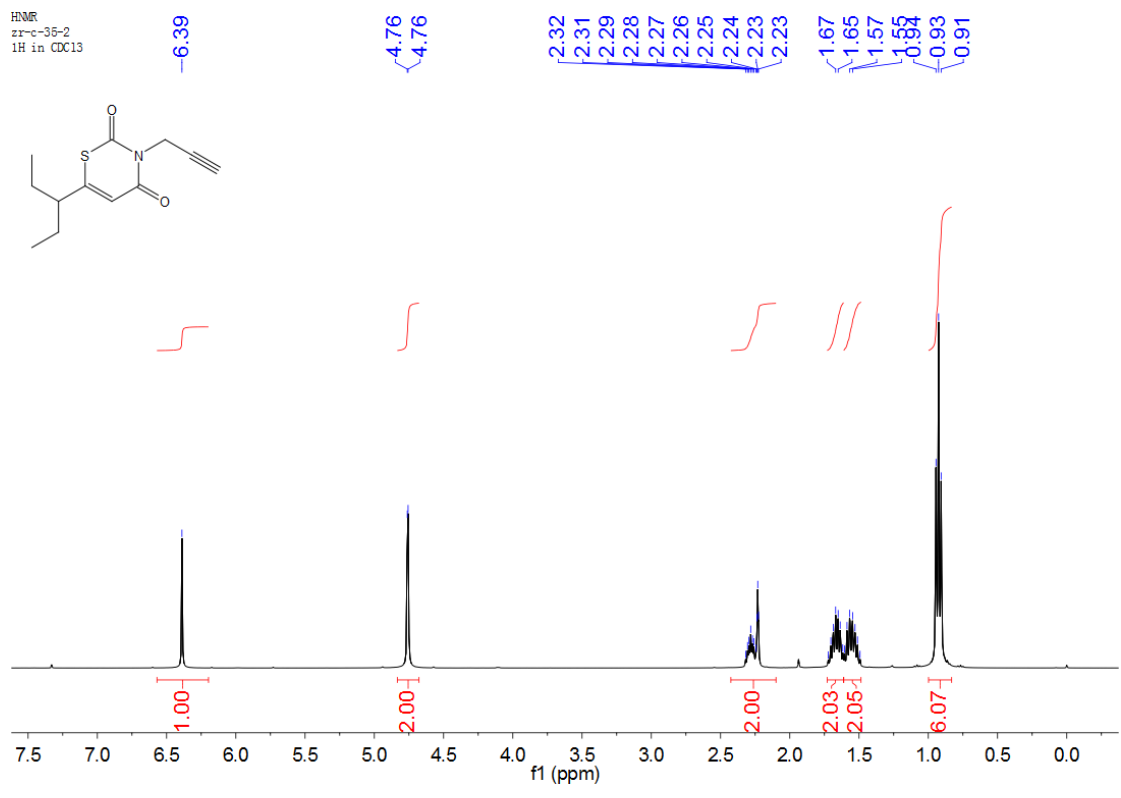

CNR  
zr-c-35-2  
13C in CDCl3

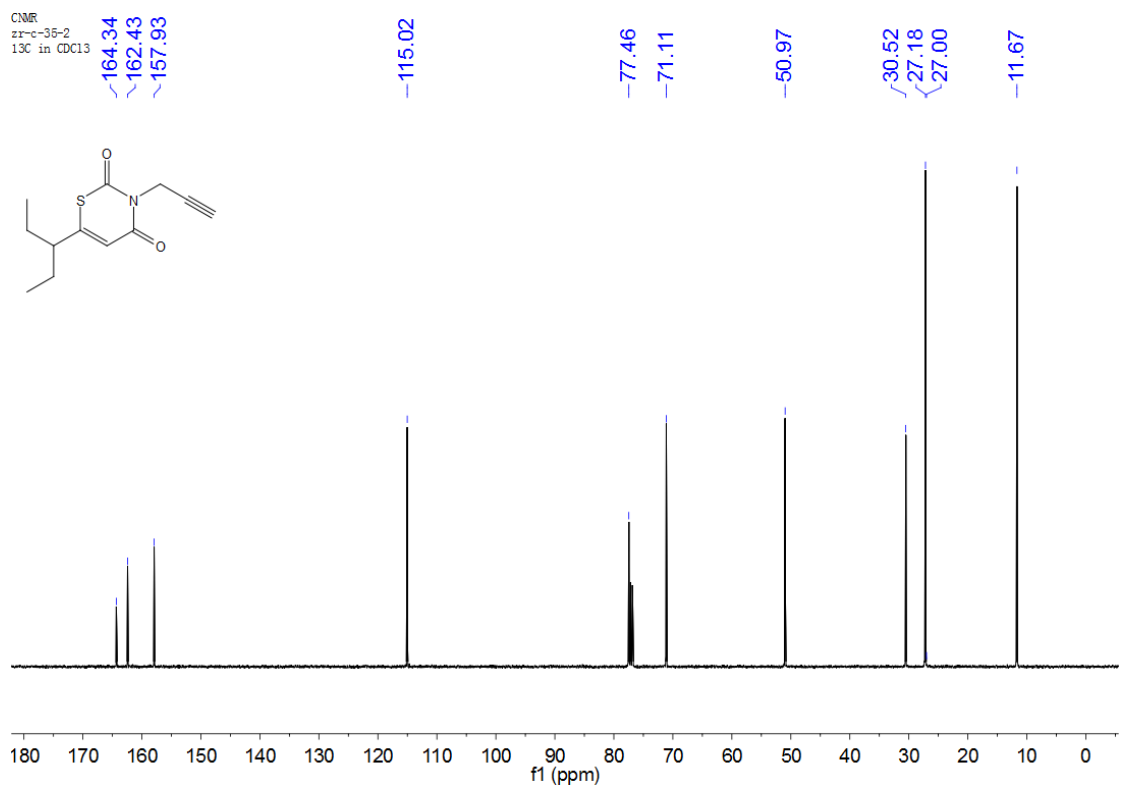

Nov22-2017  
zhang rui  
lv xiao bin

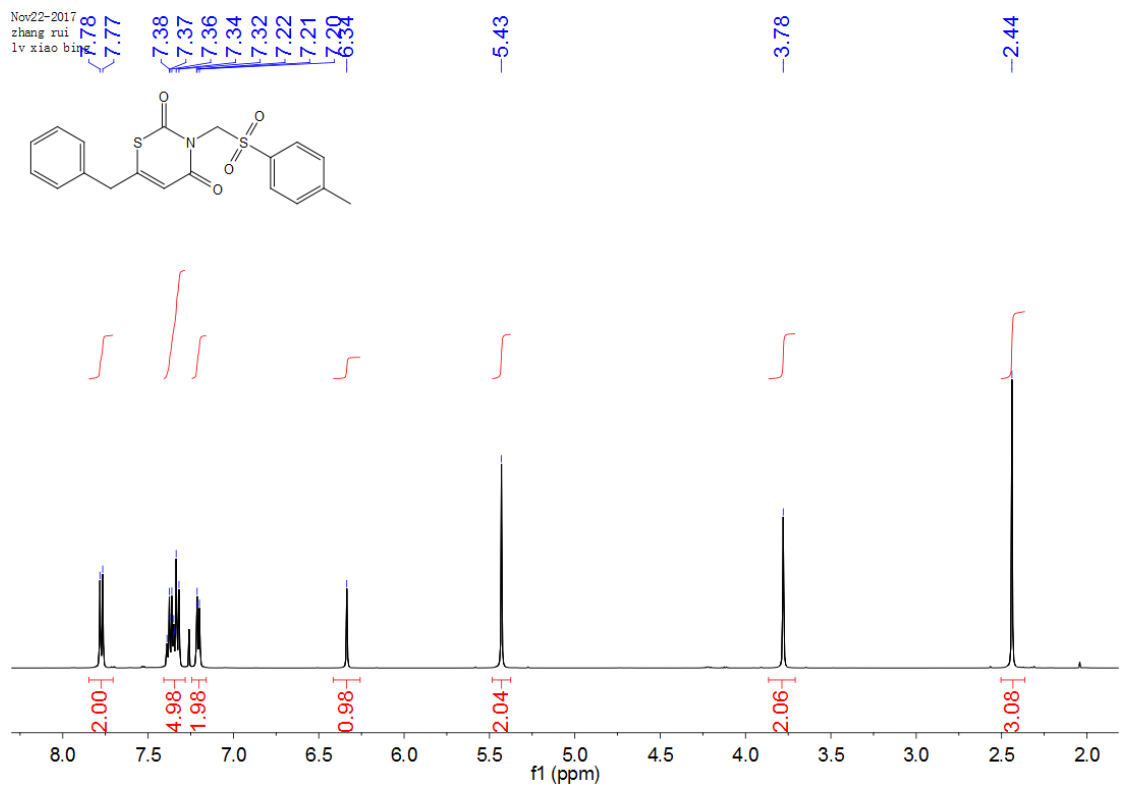

Nov23-2017  
zhangrui  
lvxiaobing lh

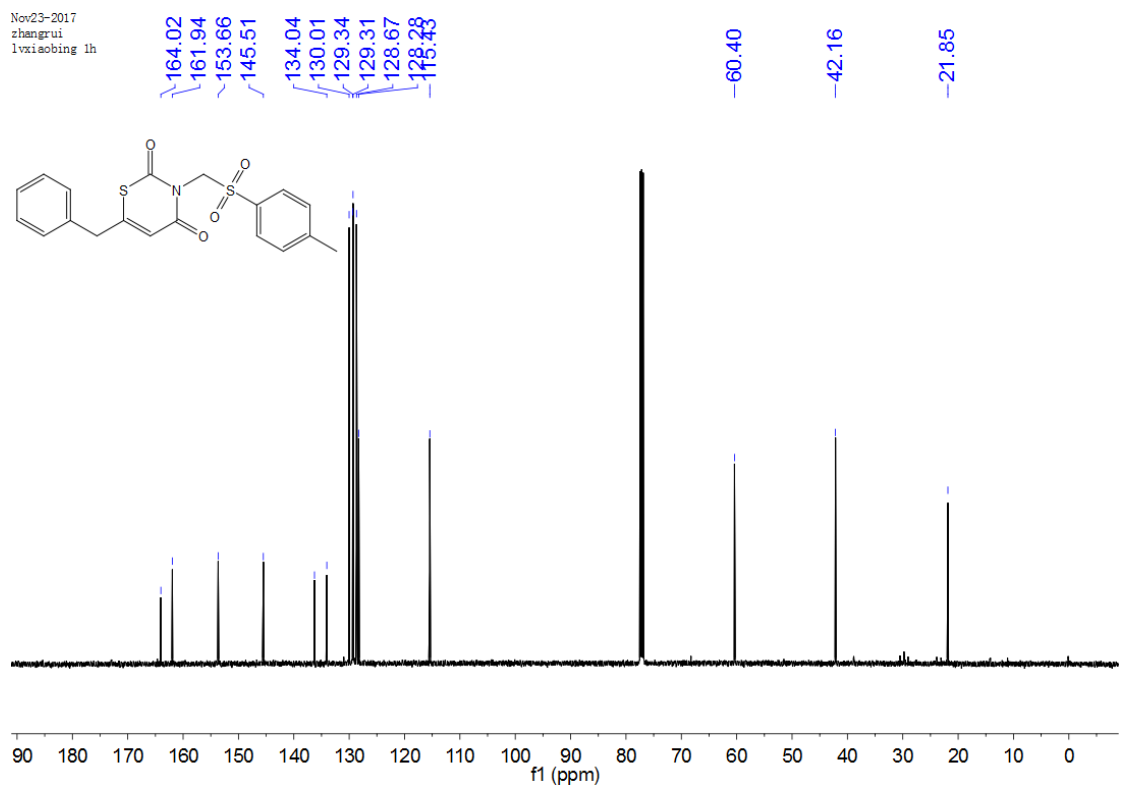

Nov17-2017  
 zhangrui  
 lvxiaobing lh

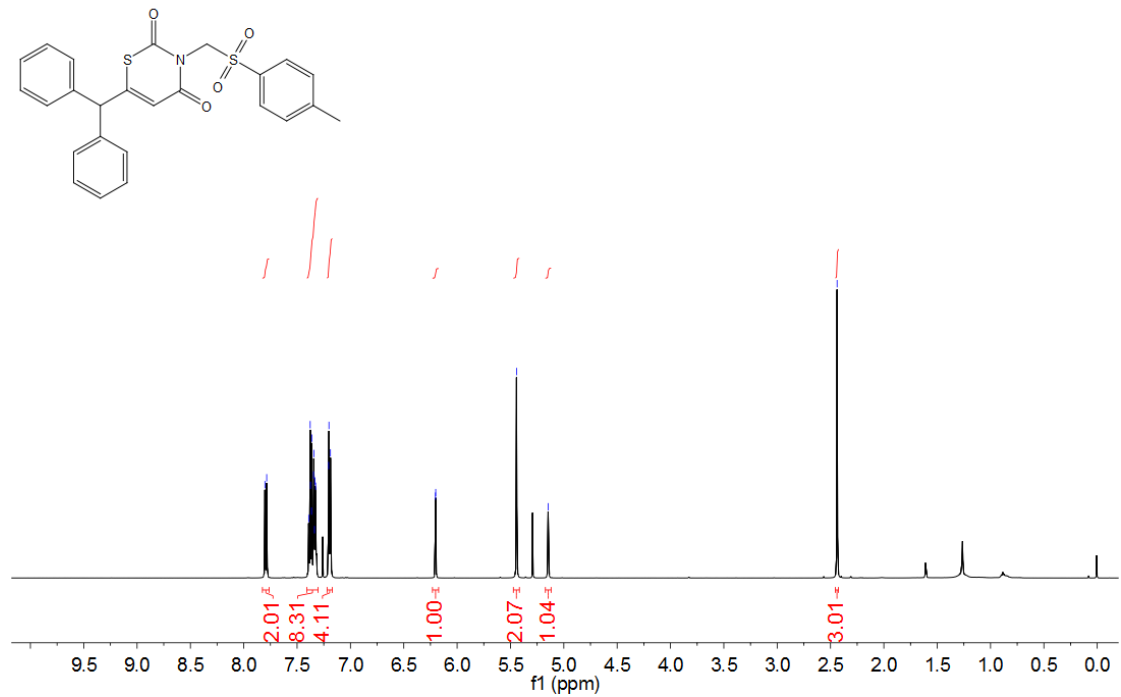

Nov17-2017  
 zhangrui  
 lvxiaobing lh

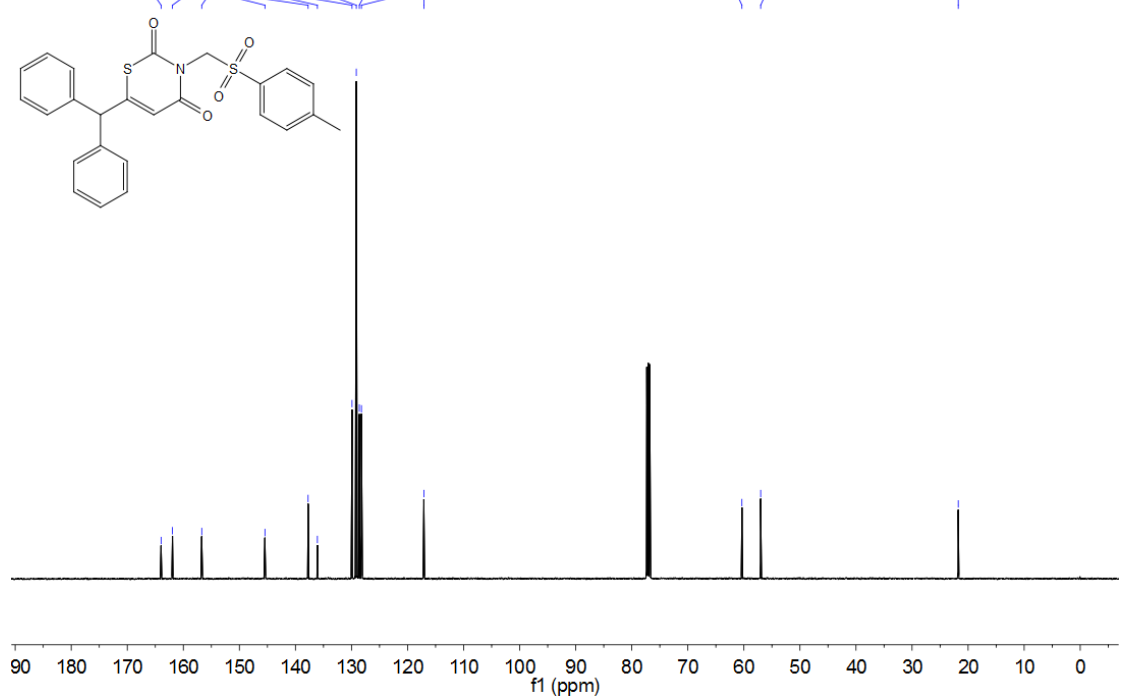

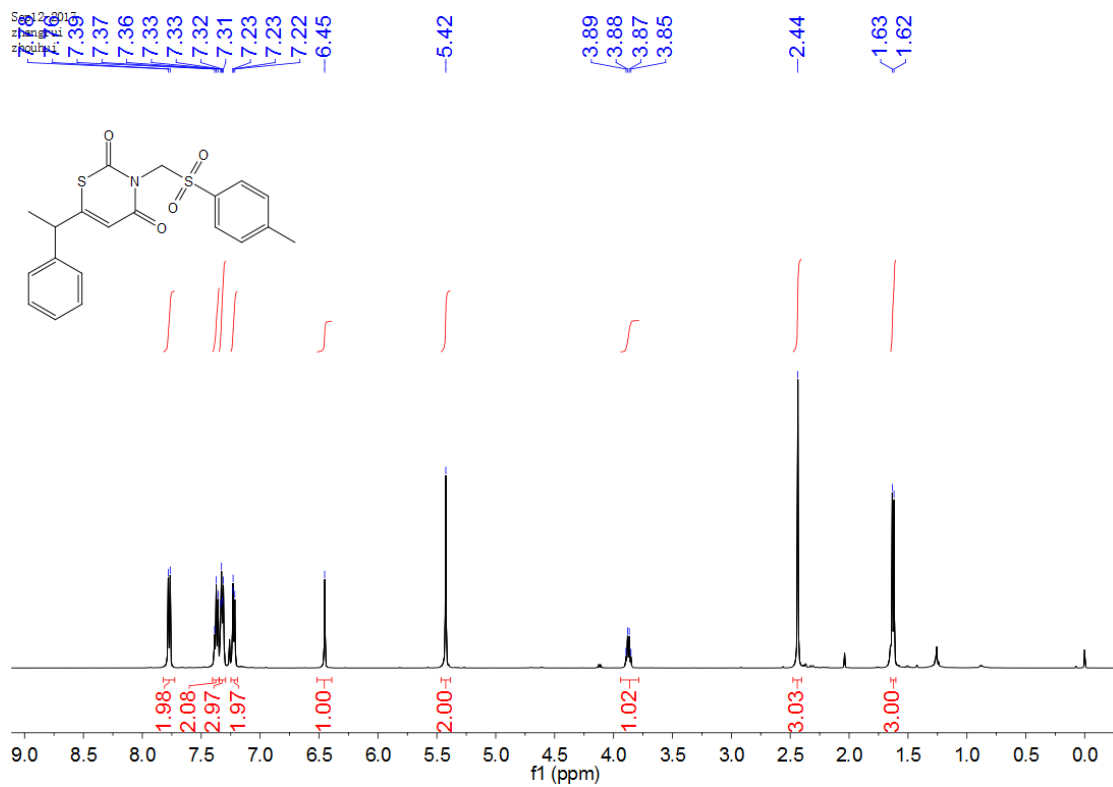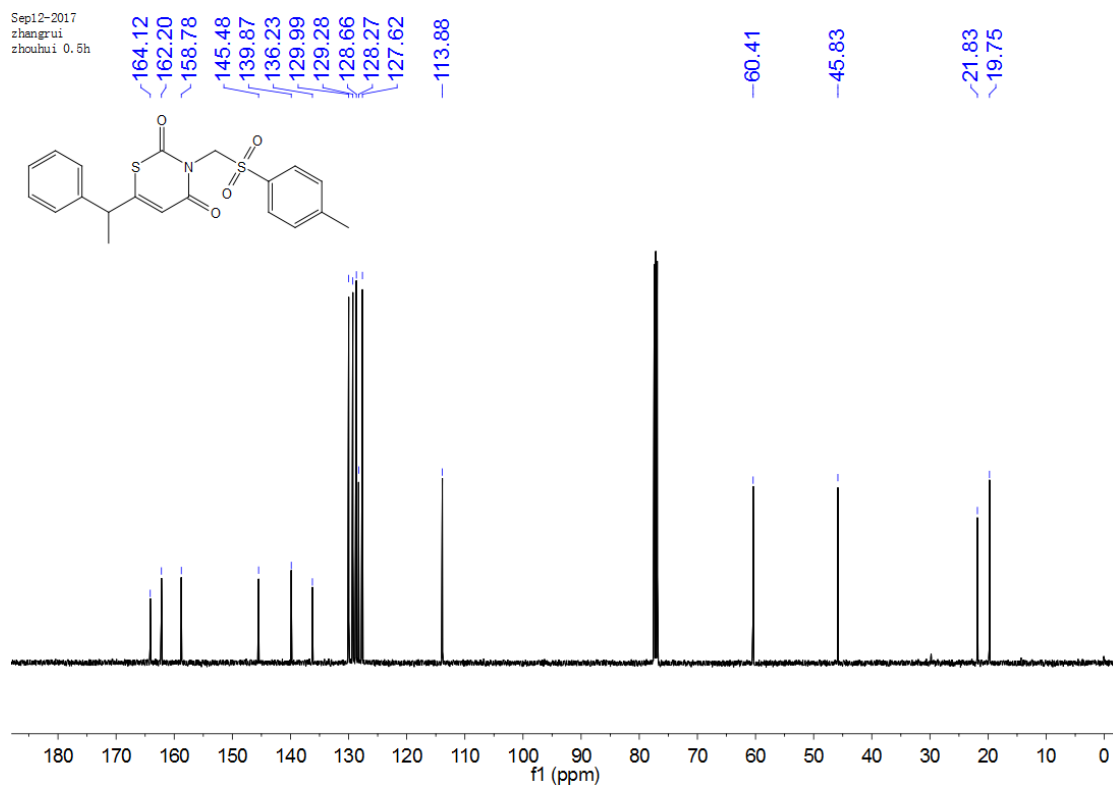

Jun28-2018  
zhangrui  
lvxiaobing lh

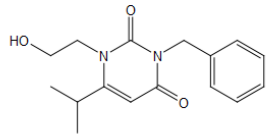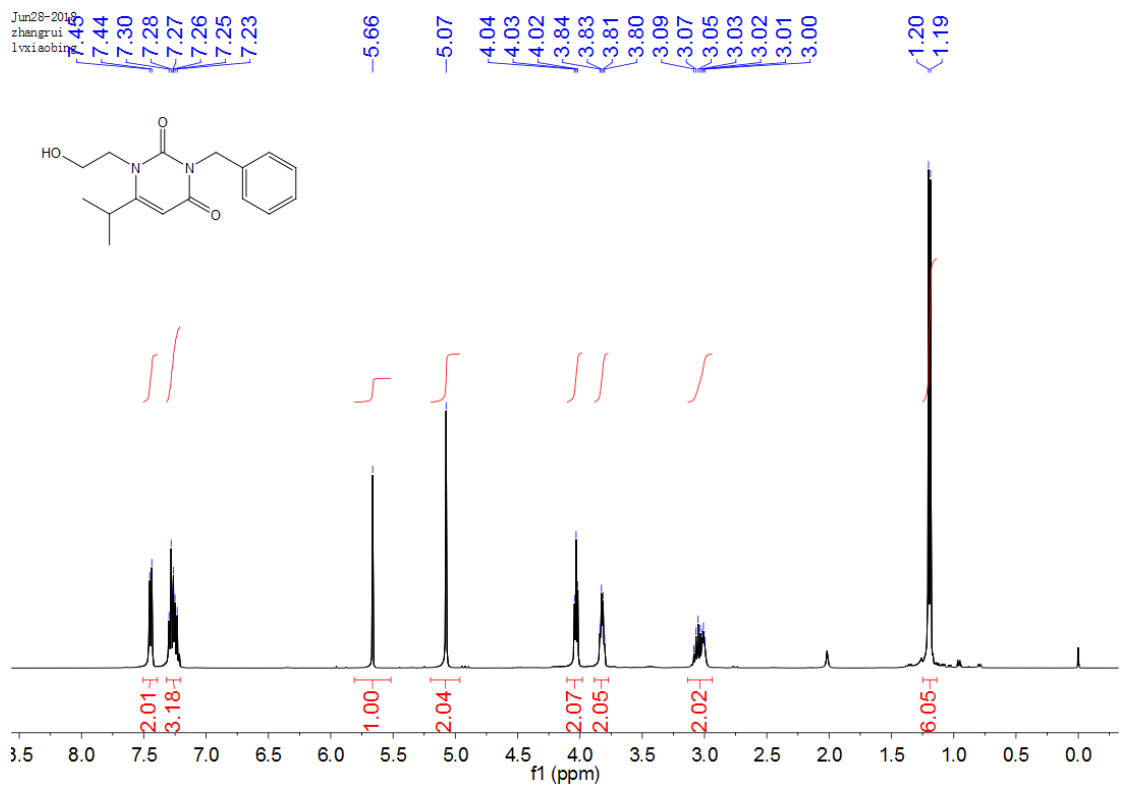

Jun28-2018  
zhangrui  
lvxiaobing lh

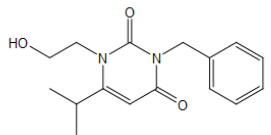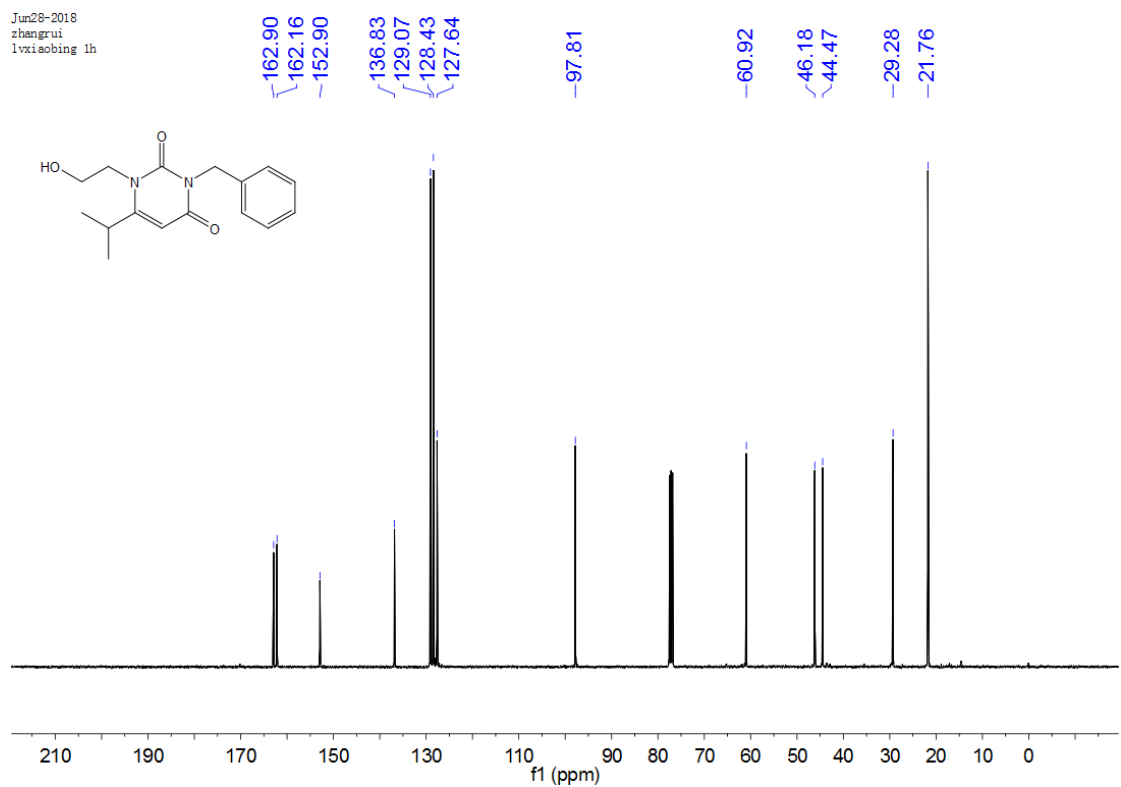



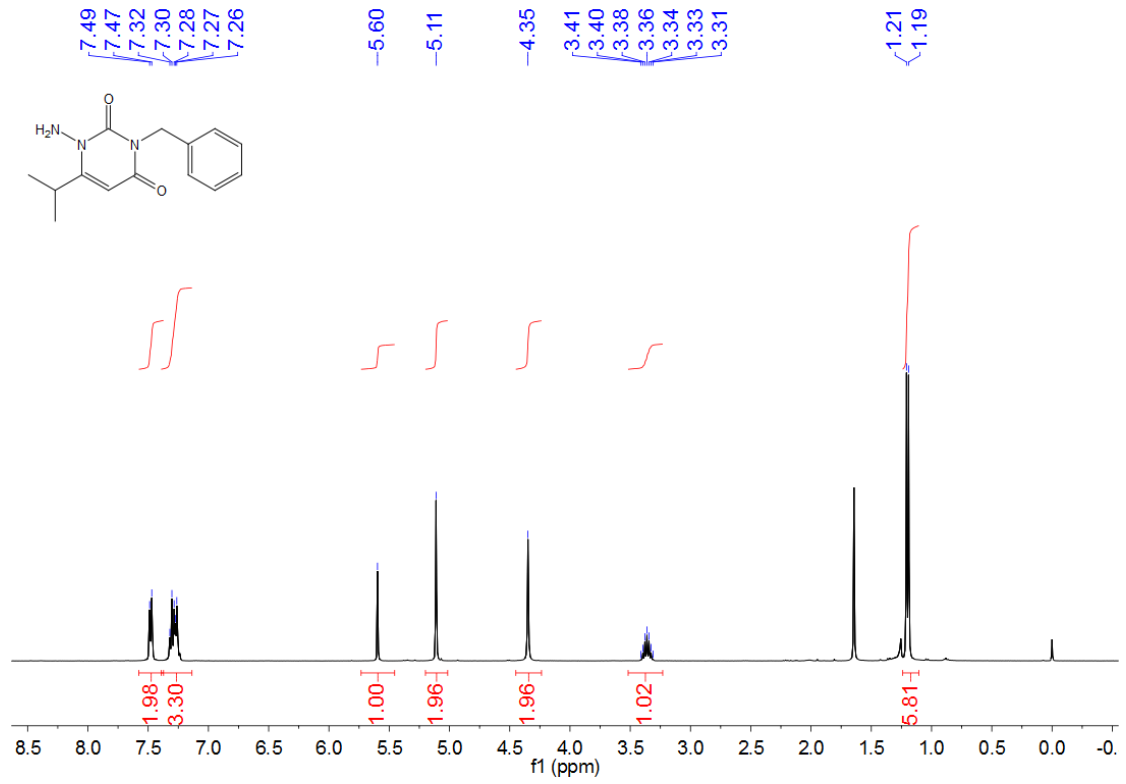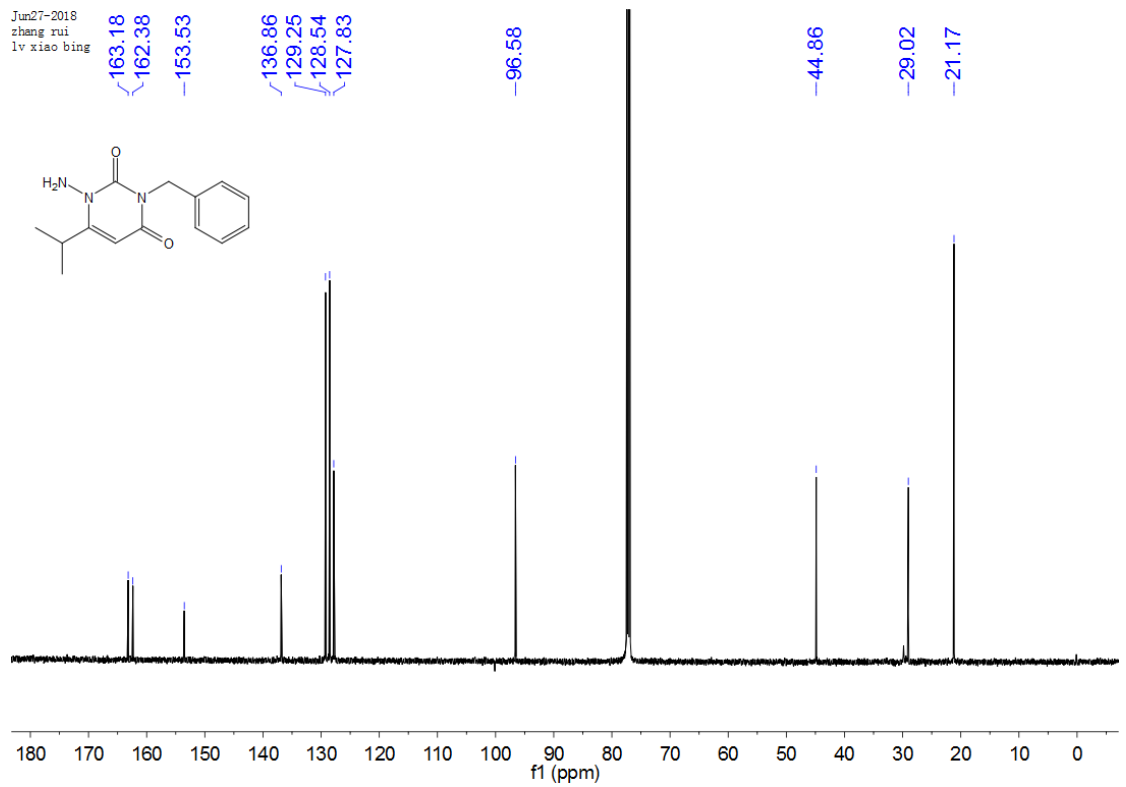

ZR-C-45-1-2  
 ZR-C-45-1  
 1H in CDCl3

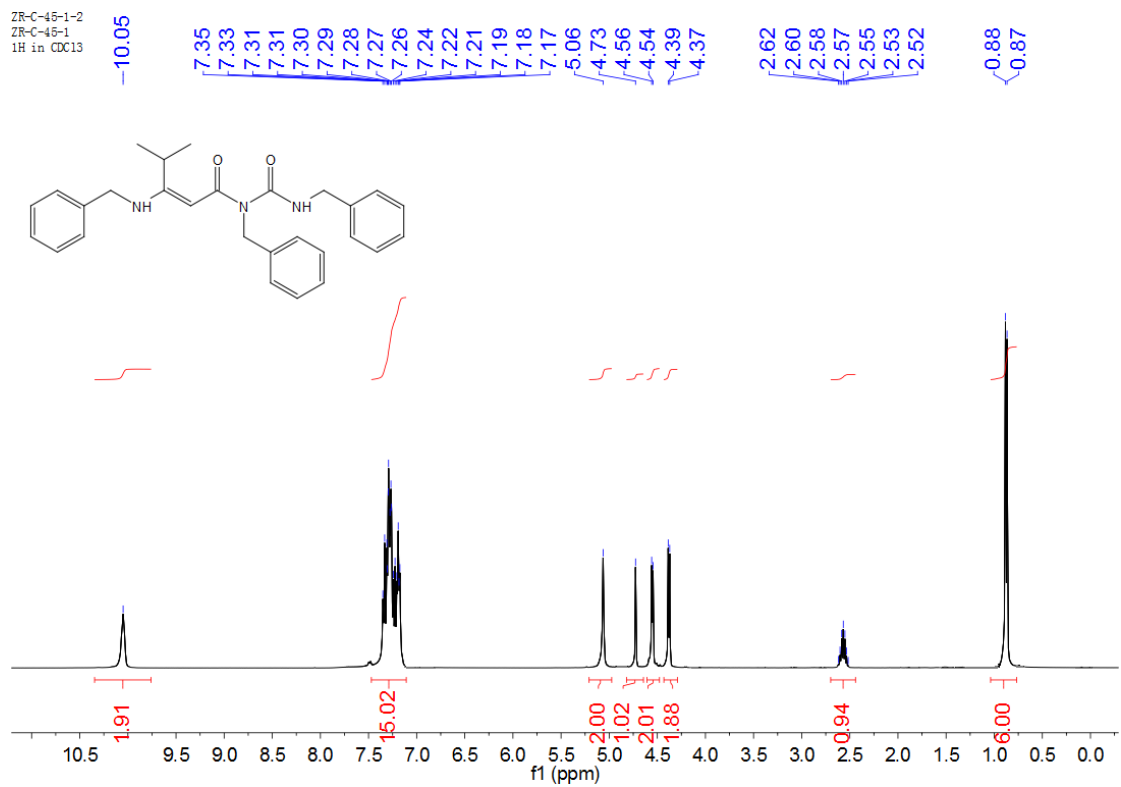

NMR  
 zr-c-45-1  
 13C in CDCl3

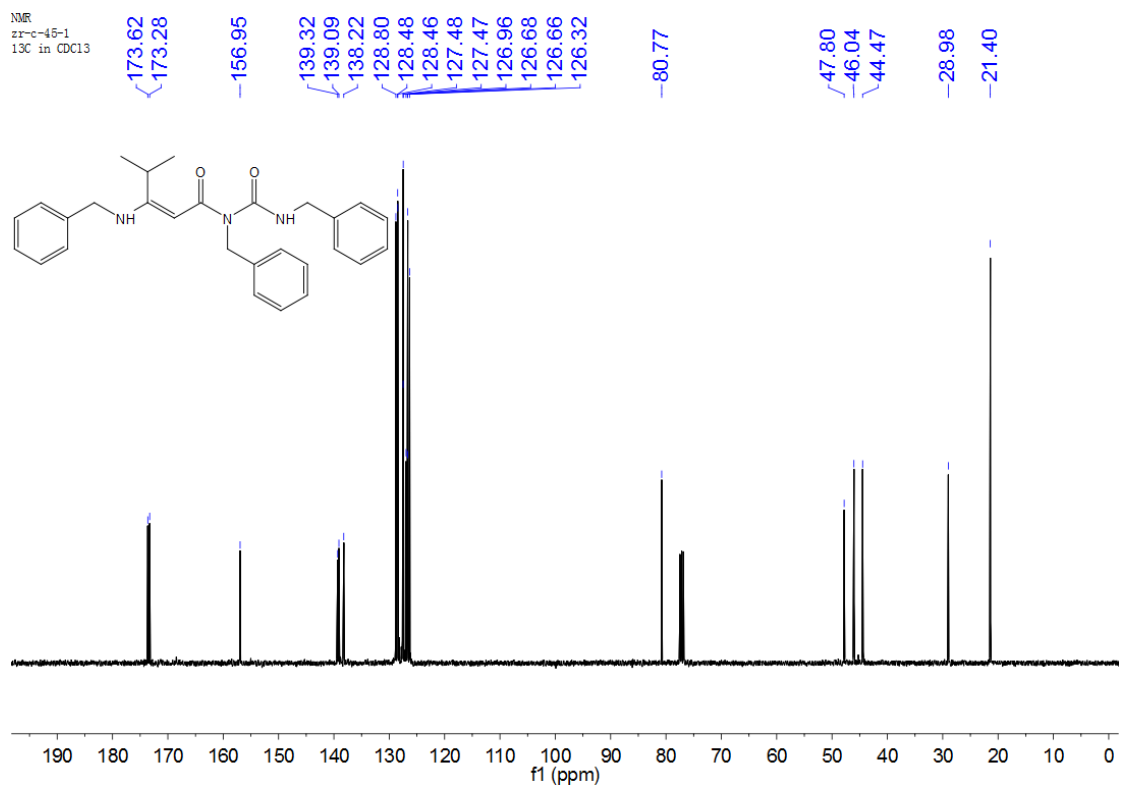

180706-26  
ZR-C-45-2  
1H in CDCl3

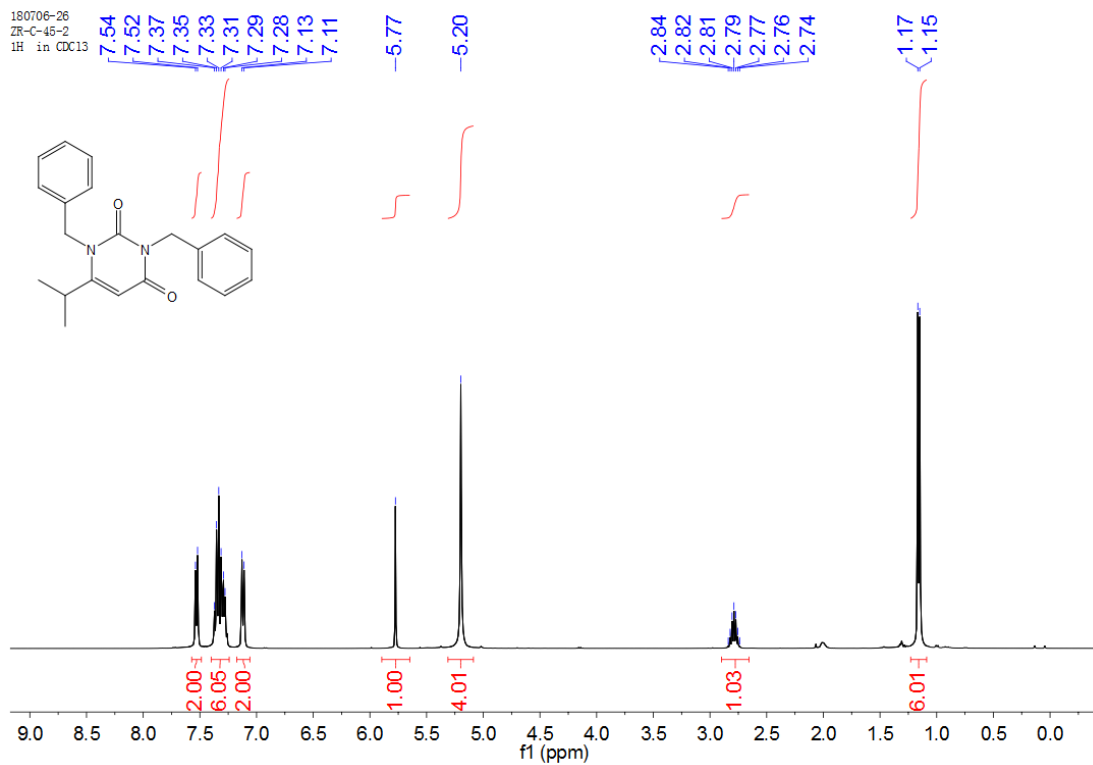

NMR  
ZR-C-45-2  
13C in CDCl3

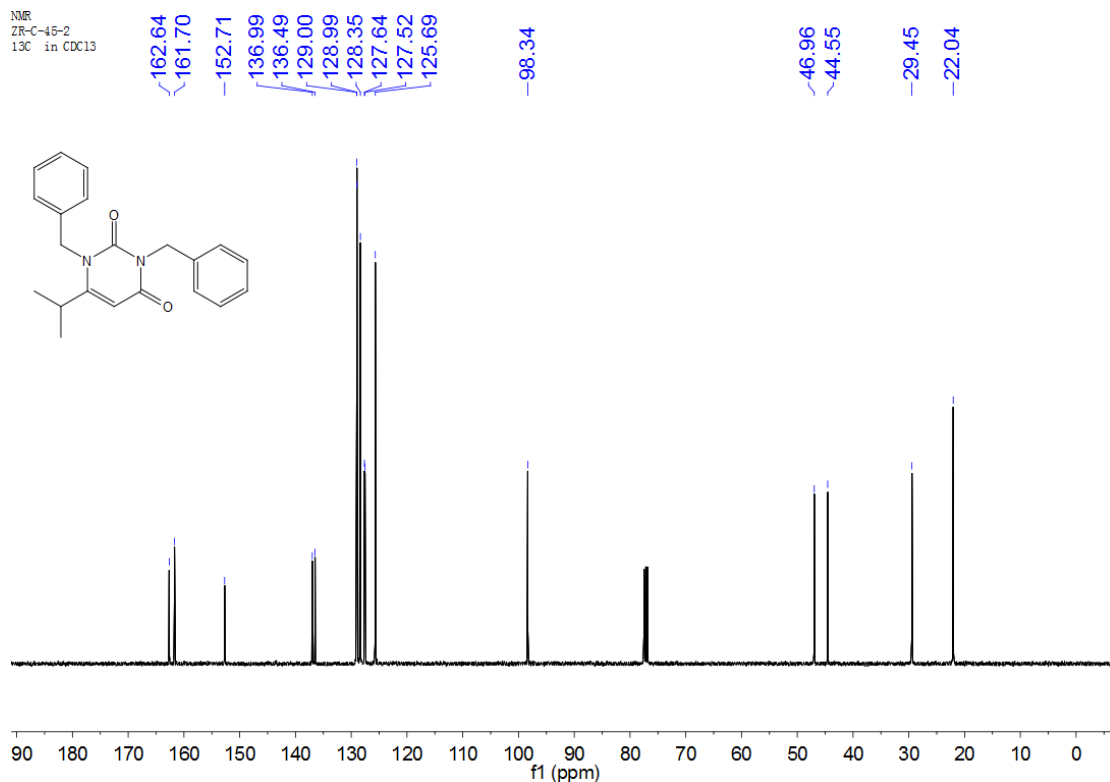

ZR-C-44-2H TM  
zr-c-44-2  
1H In CDCl3

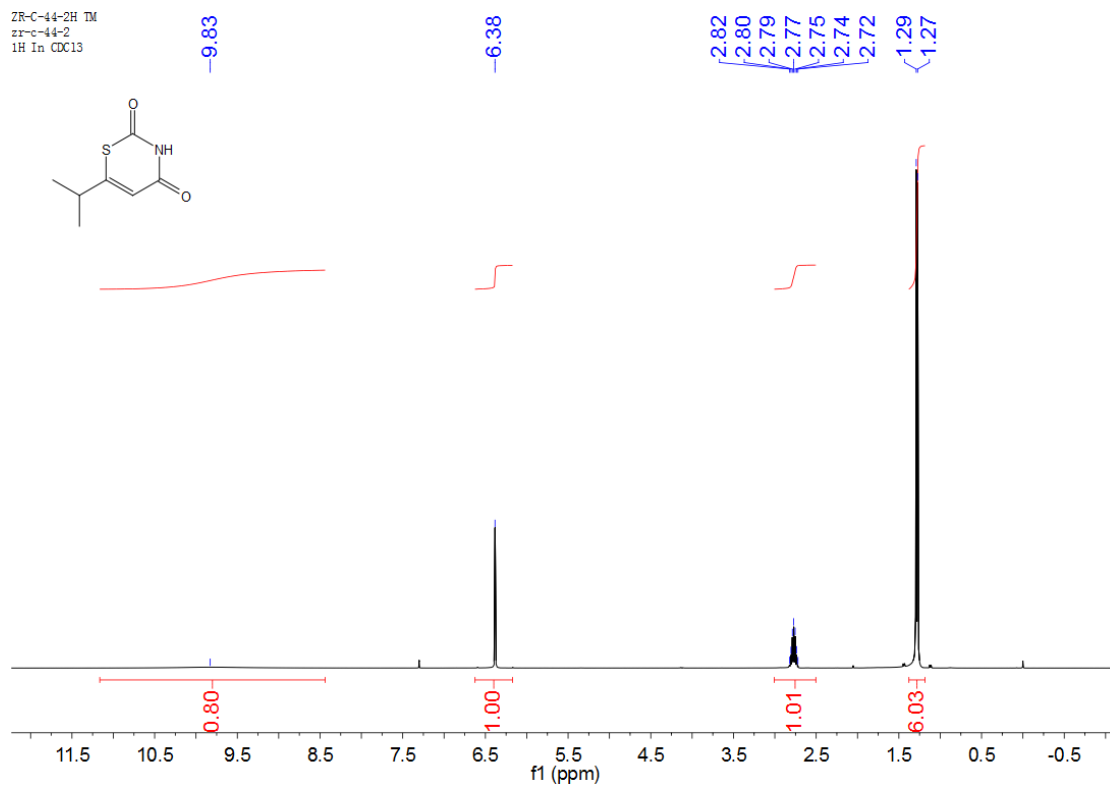

Jul10-2018  
zhengrui  
lvxiaobing lh

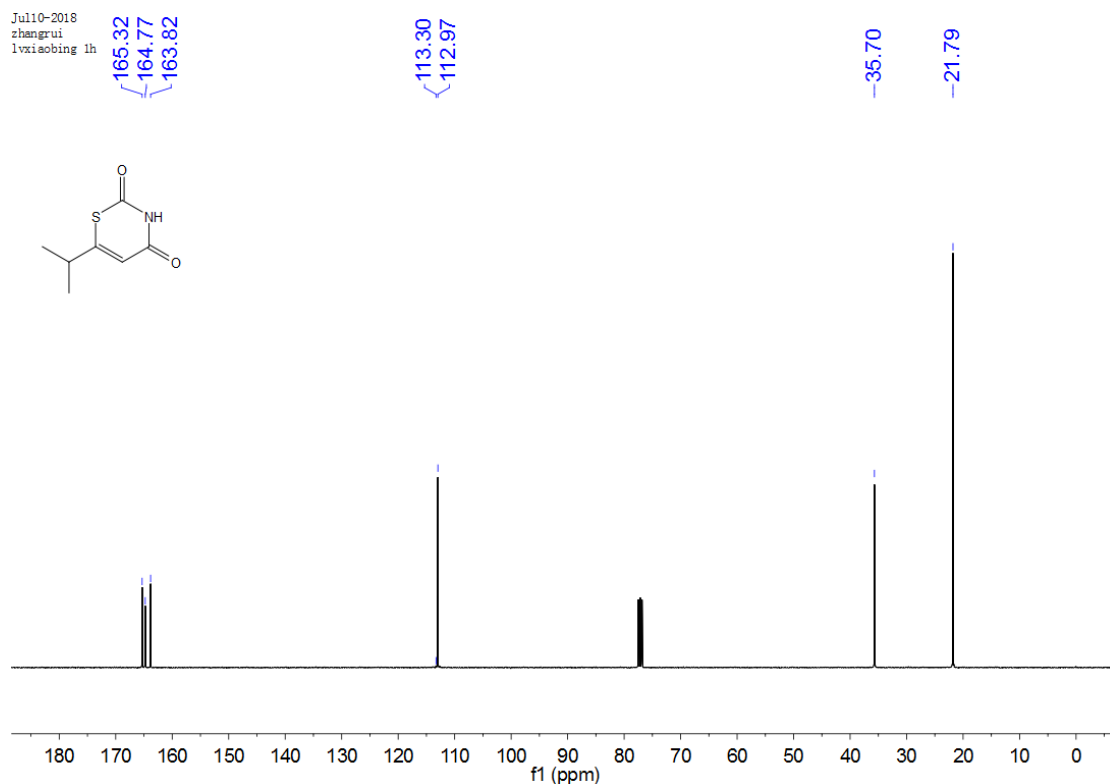

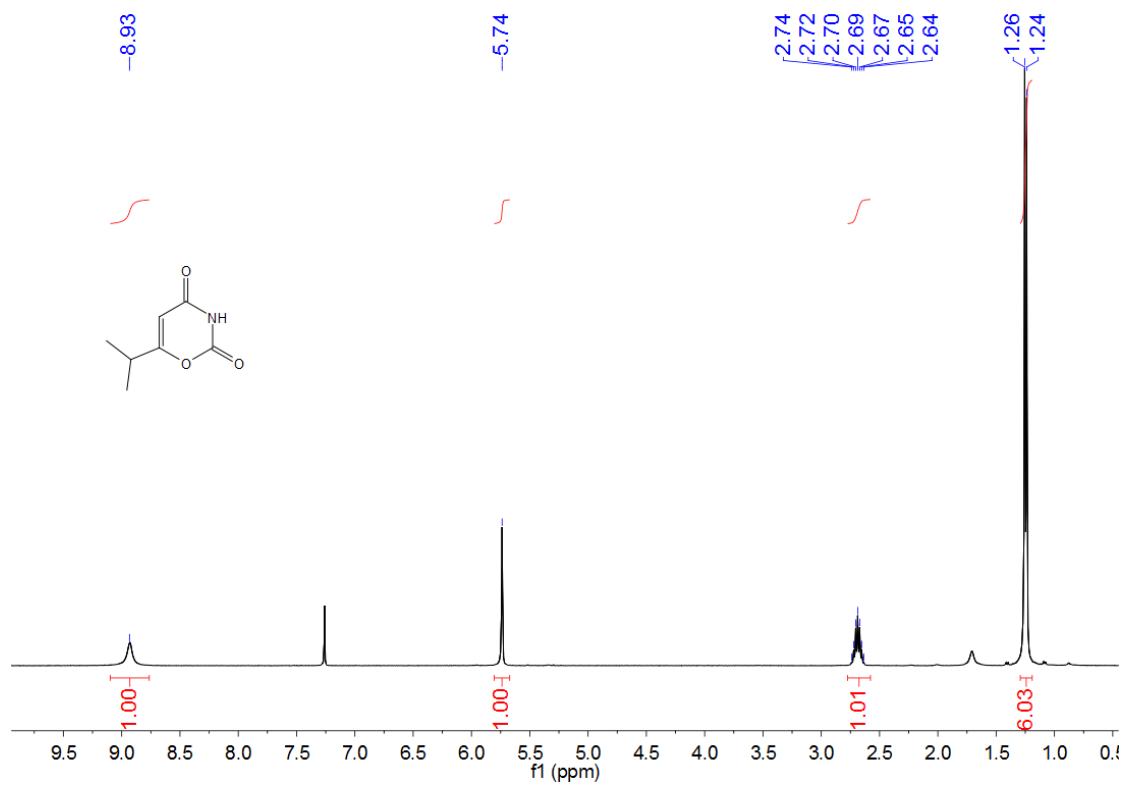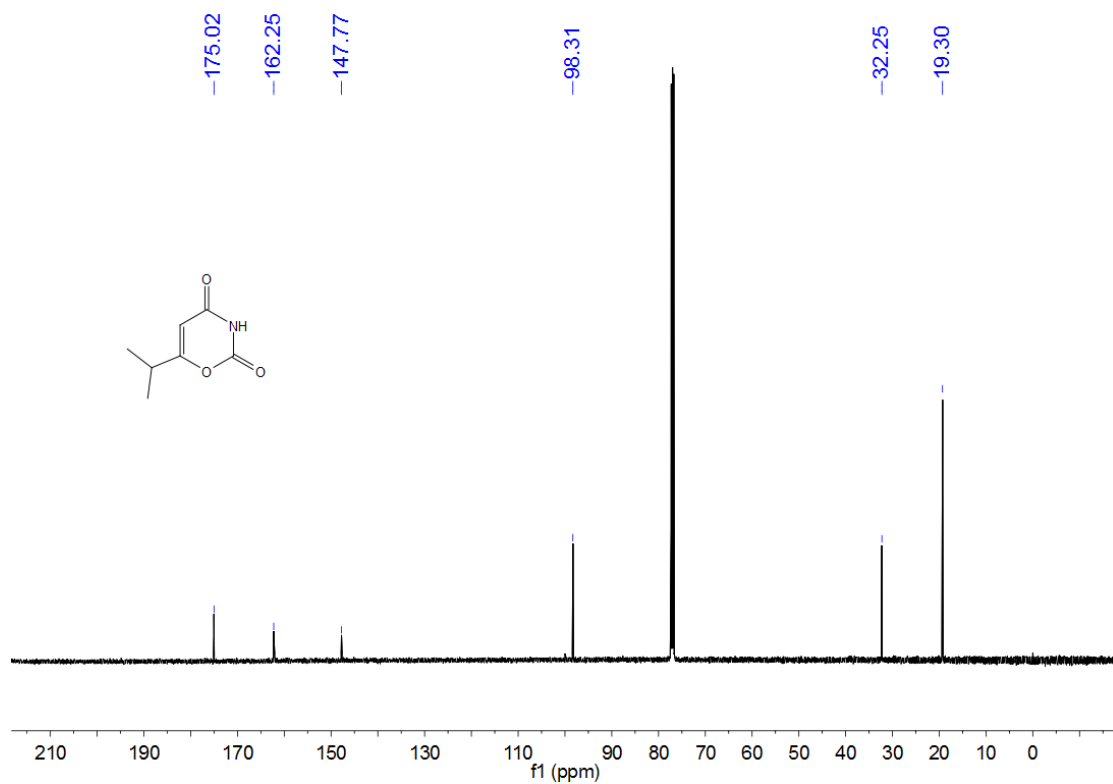

## 7. References

[S1] M. Hans, J. Wouters, A. Demonceau and L. Delaude, *Eur. J. Org. Chem.*, 2011, 7083–7091.

[S2] Y.-B. Wang, D.-S. Sun, H. Zhou, W.-Z. Zhang and X.-B. Lu, *Green Chem.*, 2015, 17, 4009–4015

[S3] H. Zhou, R. Zhang, H. Zhang, S. Mu, X.-B. Lu *Catal. Sci. Technol.* 2019, 9, 1457-1463.

[S4] SHELXTL PC; Siemens Analytical X-ray Instruments, Madison, WI, 1993.

[S5] Sheldrick, G. M. SHELXTL Structure Determination Programs, version 5.0, PC; Siemens Analytical Systems, Madison, WI, 1994.
